# Supplementary material for: De novo assembly and comparative analysis of the transcriptome of embryogenic callus formation in bread wheat (Triticum aestivum L.)
Source: BMC Plant Biol. 2017 Dec 19;17:244. doi: 10.1186/s12870-017-1204-2 (PMC5735865; doi:10.1186/s12870-017-1204-2)
Supplement: Supplementary file 7 — Information of DEGs in the comparisons between stages in IMEs and MEs. (XLSX 319 kb) [file 12870_2017_1204_MOESM7_ESM.xlsx]

## Sheet: IME6 vs. IME3
#ID	FDR	log2FC	regulated
comp120934_c0	6.53659e-06	-1.54815	down
comp126349_c0	0.00407639	1.38974	up
comp128901_c0	1.07085e-07	1.53185	up
comp128978_c0	1.7547e-06	1.09764	up
comp134128_c0	2.02763e-10	-1.53448	down
comp136525_c0	1.91069e-13	1.56506	up
comp142930_c0	9.44699e-08	1.18656	up
comp100214_c0	1.11523e-11	5.40443	up
comp101052_c0	0	7.29853	up
comp101361_c0	0.00540527	1.71143	up
comp101769_c0	8.88373e-06	4.55305	up
comp102086_c0	0.00565582	2.43713	up
comp102148_c0	1.5743e-13	1.8393	up
comp102660_c1	0.00915944	2.52939	up
comp103838_c0	1.55631e-05	3.51056	up
comp104211_c0	1.75321e-05	4.49672	up
comp104388_c0	2.44654e-09	1.92232	up
comp104996_c0	0.000550732	4.1764	up
comp106000_c0	3.23134e-09	5.09858	up
comp107353_c0	0.00567028	2.22536	up
comp107572_c0	4.36563e-10	1.3331	up
comp107758_c0	0.000137374	4.31317	up
comp107846_c0	0.00044422	1.48965	up
comp108558_c0	3.93377e-05	1.00702	up
comp108824_c0	5.12408e-06	1.30021	up
comp108955_c0	0.00020955	1.06856	up
comp109605_c0	0.000202489	1.01778	up
comp109727_c0	1.75321e-05	4.49672	up
comp109977_c0	8.60254e-11	2.95069	up
comp110904_c0	1.75321e-05	4.49672	up
comp111179_c0	1.17421e-08	5.02081	up
comp112536_c0	0	6.79023	up
comp112721_c0	0.00531805	2.58361	up
comp113000_c0	1.17779e-05	1.75897	up
comp113078_c0	0	2.96758	up
comp113512_c1	1.47586e-08	1.66356	up
comp113682_c0	0.0060585	1.7349	up
comp113682_c1	2.24801e-08	4.9803	up
comp113766_c0	0.00680134	2.97228	up
comp114051_c0	0.000550732	4.1764	up
comp114578_c0	4.44089e-15	5.75598	up
comp114601_c0	9.81965e-09	3.33145	up
comp114634_c0	1.15685e-13	1.52169	up
comp114673_c0	1.67527e-05	1.93748	up
comp114829_c0	3.74805e-05	1.26753	up
comp115029_c0	8.88373e-06	4.55305	up
comp115197_c0	0.00307747	2.63586	up
comp115214_c0	0	1.73305	up
comp115524_c0	0	1.8995	up
comp115533_c0	1.00759e-06	2.00638	up
comp116425_c1	0.0034814	2.36622	up
comp116536_c0	6.89416e-05	4.37699	up
comp116644_c0	7.12572e-06	2.30115	up
comp117144_c0	2.04806e-11	1.47996	up
comp117215_c0	0	2.46256	up
comp117222_c0	1.22077e-07	1.17765	up
comp117629_c0	0.00829344	2.7158	up
comp117880_c1	4.76469e-10	5.20789	up
comp118321_c0	0	6.2912	up
comp118936_c0	2.10835e-11	4.28981	up
comp119008_c0	0.00059634	1.15854	up
comp119343_c0	0.000369461	1.51142	up
comp119435_c0	0.00093249	1.14735	up
comp119521_c0	5.60382e-07	1.36768	up
comp119562_c0	2.87729e-05	1.02565	up
comp119570_c0	2.22156e-13	2.18639	up
comp119626_c0	0	6.83635	up
comp119632_c0	7.20205e-11	5.30951	up
comp119698_c0	0.00263282	2.83076	up
comp119820_c0	0.00915944	2.52939	up
comp120098_c0	2.07131e-11	5.37348	up
comp120113_c0	5.10124e-05	1.40414	up
comp120169_c0	0.00567028	2.22536	up
comp120210_c0	0.00467921	2.77442	up
comp120326_c0	9.5336e-12	2.76236	up
comp120344_c0	5.3931e-11	2.74366	up
comp120772_c1	0.00130472	1.12515	up
comp120887_c0	4.55544e-08	2.14372	up
comp120889_c1	7.89093e-07	1.40831	up
comp120921_c0	8.14111e-05	2.39183	up
comp121043_c0	4.24588e-11	1.3735	up
comp121091_c0	1.44329e-15	5.8032	up
comp121180_c1	4.76008e-07	1.54306	up
comp121331_c0	2.30265e-06	4.65953	up
comp121399_c0	1.69453e-12	1.55164	up
comp121468_c3	0.000352706	1.59329	up
comp121599_c0	1.14457e-05	1.66676	up
comp121769_c0	1.06007e-06	1.1119	up
comp121787_c0	3.12403e-05	1.49058	up
comp122004_c0	0.000688786	1.61864	up
comp122550_c0	0.000868721	1.17462	up
comp122584_c0	0	7.55453	up
comp122628_c0	3.41491e-11	1.82772	up
comp122727_c1	3.24315e-05	1.03252	up
comp122914_c0	0.000470077	1.07564	up
comp123052_c1	1.25957e-06	1.79213	up
comp123116_c0	0.00140741	1.65167	up
comp123465_c0	5.6577e-13	1.47199	up
comp123622_c0	5.38241e-07	1.87102	up
comp123629_c1	1.29896e-13	1.52772	up
comp123877_c0	4.31633e-08	4.93862	up
comp123924_c0	0.00172371	1.68409	up
comp123973_c0	0.00462607	1.7911	up
comp124011_c0	0.00713511	1.33005	up
comp124030_c0	0	2.50694	up
comp124103_c1	1.21823e-05	2.06997	up
comp124109_c0	1.08525e-06	2.26891	up
comp124322_c0	5.97437e-05	2.12981	up
comp124395_c0	0.00148893	1.00841	up
comp124405_c1	0.00010534	1.6611	up
comp124442_c2	5.55112e-16	1.96726	up
comp124508_c1	6.89416e-05	4.37699	up
comp124511_c0	0.000786818	1.71228	up
comp124605_c0	0.000702645	1.00884	up
comp124870_c0	0.00468653	3.35548	up
comp124954_c0	0.000275946	1.09777	up
comp124964_c0	1.42999e-09	2.90331	up
comp125009_c0	0.0011079	1.68996	up
comp125036_c0	0.00602235	1.19762	up
comp125175_c0	3.77476e-15	1.82937	up
comp125500_c0	0.00040511	2.66579	up
comp125523_c0	0.00150786	1.46517	up
comp125619_c0	1.61082e-12	2.10932	up
comp125646_c0	0	2.39564	up
comp125671_c0	0	6.62923	up
comp125797_c0	1.04467e-08	1.92396	up
comp125818_c0	0	2.31413	up
comp125840_c1	7.0306e-06	1.83383	up
comp125879_c0	0.00392495	1.22359	up
comp125915_c0	0	6.25769	up
comp126040_c0	0	2.50251	up
comp126096_c0	7.78511e-12	1.71016	up
comp126098_c0	0.00328486	1.03789	up
comp126197_c0	0.00294066	1.29569	up
comp126274_c0	2.63664e-05	1.62654	up
comp126421_c1	2.39712e-10	1.7125	up
comp126558_c2	0.0066905	1.18526	up
comp126603_c1	0	6.46276	up
comp126679_c0	4.96987e-08	1.4109	up
comp126732_c0	0.000394995	1.75593	up
comp126776_c0	5.468e-08	2.33609	up
comp126788_c0	0.00132938	1.84786	up
comp126818_c0	6.60338e-07	1.38611	up
comp126859_c0	0	6.03844	up
comp126863_c0	4.39909e-05	1.25333	up
comp127028_c1	8.88373e-06	4.55305	up
comp127031_c0	0.00614821	1.00665	up
comp127084_c0	1.75987e-06	1.80427	up
comp127381_c1	0.00278718	1.46636	up
comp127401_c0	6.72709e-10	1.58599	up
comp127409_c1	4.69897e-05	1.19033	up
comp127581_c0	5.95127e-09	1.55116	up
comp127644_c0	4.10854e-06	1.43246	up
comp127728_c0	0	3.44756	up
comp127728_c2	5.81938e-11	1.37168	up
comp127796_c0	0	6.49187	up
comp127816_c0	0.00767425	1.10143	up
comp127821_c0	0.000101576	1.21977	up
comp127887_c1	0.000148458	1.5497	up
comp128201_c0	0.00501802	1.01944	up
comp128202_c0	0.000512609	1.11555	up
comp128241_c0	0.00362016	1.0647	up
comp128284_c0	0.000257482	1.21809	up
comp128743_c0	9.35283e-05	1.02472	up
comp128902_c1	7.749e-05	1.04022	up
comp128925_c0	0.00680134	2.97228	up
comp128985_c0	0.00231784	1.05012	up
comp129206_c0	0.00286446	1.1125	up
comp129218_c0	4.35766e-05	1.01971	up
comp129268_c1	4.26414e-05	1.10754	up
comp129576_c0	0.0099202	1.72984	up
comp129605_c0	0.000184831	1.49552	up
comp129803_c0	3.96294e-12	2.20324	up
comp129836_c0	0.00331247	1.44121	up
comp129848_c0	1.38066e-08	1.7671	up
comp129862_c0	0.00747138	1.41369	up
comp129943_c0	0.00280448	1.15529	up
comp130151_c0	1.47713e-06	1.58889	up
comp130222_c0	0.00346887	1.3368	up
comp130230_c0	4.20775e-13	1.52377	up
comp130359_c3	0	2.2091	up
comp130437_c0	0.000439876	1.18683	up
comp130443_c0	1.70364e-12	1.59992	up
comp130451_c2	0.000270034	1.05323	up
comp130500_c0	0	6.32395	up
comp130513_c0	0	2.16653	up
comp130513_c1	3.91555e-07	1.15571	up
comp130615_c0	0.00269351	1.35255	up
comp130677_c1	5.77418e-10	1.31084	up
comp130729_c2	0.00240616	1.5386	up
comp130729_c3	2.52105e-05	1.9689	up
comp131106_c2	9.73529e-08	1.26415	up
comp131299_c0	6.5779e-08	1.23674	up
comp131303_c1	0.0014326	1.24727	up
comp131404_c0	0.000103	1.14625	up
comp131418_c0	5.32211e-05	1.04623	up
comp131637_c0	1.34418e-11	1.81597	up
comp131700_c0	0.00123013	1.0056	up
comp131893_c3	3.61589e-10	1.332	up
comp131899_c0	8.53483e-07	1.12953	up
comp131908_c0	5.72808e-12	1.8209	up
comp131972_c0	2.13162e-05	1.02106	up
comp132021_c0	7.49954e-07	1.69497	up
comp132185_c3	9.95589e-09	1.28372	up
comp132628_c0	1.55391e-07	1.17321	up
comp132823_c0	0.00878933	1.70522	up
comp133066_c1	0.00136385	1.0294	up
comp133493_c1	2.88656e-05	1.0871	up
comp133578_c0	3.15848e-09	1.57866	up
comp133775_c0	0.00983618	1.6347	up
comp133803_c0	8.46365e-07	1.64799	up
comp133815_c2	7.89125e-11	1.36031	up
comp133930_c0	4.48826e-05	1.39919	up
comp134044_c4	3.68012e-10	1.32172	up
comp134135_c0	0.000531294	1.37056	up
comp134287_c0	9.79981e-05	2.65072	up
comp134363_c3	0.00177891	1.79372	up
comp134684_c1	1.64174e-07	1.25161	up
comp134693_c0	0.00586259	1.12125	up
comp134932_c0	0.000421854	1.06971	up
comp134958_c1	1.73326e-05	1.45302	up
comp135103_c1	1.0057e-11	1.46186	up
comp135342_c1	0.00248166	1.03453	up
comp135351_c1	0.00416273	1.76398	up
comp135487_c0	1.11022e-16	2.8758	up
comp135539_c0	6.79996e-10	1.307	up
comp135589_c0	6.88109e-06	1.10998	up
comp135962_c1	5.60183e-06	1.12208	up
comp136043_c0	1.2661e-12	1.57716	up
comp136043_c1	2.19653e-07	1.35928	up
comp136214_c0	1.08027e-07	2.34167	up
comp136273_c0	2.90046e-12	1.43815	up
comp136379_c0	1.97185e-06	1.12091	up
comp136401_c0	2.88658e-15	1.62736	up
comp136774_c1	1.75749e-09	1.52047	up
comp136774_c6	0.00736857	1.03801	up
comp136888_c0	2.04195e-06	1.36075	up
comp137025_c0	1.18774e-05	1.03938	up
comp137045_c0	1.81188e-13	1.50245	up
comp137171_c2	4.08498e-07	1.55858	up
comp137308_c0	0.00980882	1.12974	up
comp137327_c2	2.6306e-06	1.14408	up
comp137651_c1	4.9937e-05	1.04855	up
comp137787_c2	2.53272e-07	1.15329	up
comp137935_c0	0.00150786	1.46517	up
comp138292_c4	2.05837e-06	1.202	up
comp138392_c0	0.00833575	1.19578	up
comp138515_c0	0.000106802	1.28521	up
comp138631_c2	3.93981e-05	1.02418	up
comp138684_c0	1.92836e-07	1.33715	up
comp138784_c1	9.07052e-14	1.60035	up
comp138905_c0	0	3.23783	up
comp139246_c0	6.25327e-10	1.44284	up
comp139514_c1	4.76216e-11	1.38923	up
comp139527_c0	2.03114e-09	1.31558	up
comp139920_c1	0.00401505	1.10027	up
comp140564_c1	5.5453e-06	2.14671	up
comp140613_c0	2.28117e-05	1.04571	up
comp140818_c0	4.2814e-06	1.07287	up
comp140925_c0	0.00405042	1.14261	up
comp140996_c0	5.66214e-15	1.58783	up
comp141026_c0	8.6862e-06	1.04989	up
comp141202_c0	1.6207e-12	1.44774	up
comp141266_c0	2.47301e-07	1.15467	up
comp141438_c0	3.09465e-09	1.27981	up
comp141979_c0	1.84017e-05	1.48059	up
comp142043_c1	2.65554e-10	1.39719	up
comp142076_c0	2.56019e-09	1.3985	up
comp142935_c0	4.13949e-05	1.05149	up
comp144138_c0	0	5.13205	up
comp145269_c0	1.52755e-07	1.1857	up
comp150381_c0	4.07116e-06	1.25467	up
comp150391_c0	1.47095e-08	1.63599	up
comp154370_c0	0.00467921	2.77442	up
comp154883_c0	4.63401e-07	1.2945	up
comp172238_c0	1.01355e-08	1.93692	up
comp172929_c0	0.00272875	1.95923	up
comp179132_c0	0.00560439	1.00262	up
comp20216_c0	0.000274619	4.24641	up
comp423432_c0	0.00546467	2.14593	up
comp430831_c0	0.00201764	3.0972	up
comp46708_c0	2.63123e-14	5.68213	up
comp521337_c0	0.00104225	1.94117	up
comp534761_c0	0.000550732	4.1764	up
comp655536_c0	0.000137374	4.31317	up
comp66469_c0	1.65954e-06	1.3443	up
comp67095_c0	0	2.79632	up
comp68596_c0	3.9468e-05	2.07369	up
comp70336_c0	0.00104225	1.94117	up
comp71494_c0	0.000318858	2.37353	up
comp72597_c0	1.17781e-06	4.70995	up
comp74529_c0	0.00827918	1.5482	up
comp74787_c0	8.88373e-06	4.55305	up
comp75532_c0	3.47104e-05	4.43809	up
comp76789_c0	1.75321e-05	4.49672	up
comp77962_c0	0	6.84766	up
comp79243_c0	0.000832028	1.64432	up
comp80535_c0	0.00680134	2.97228	up
comp80775_c0	4.01934e-07	2.40495	up
comp81000_c0	3.47104e-05	4.43809	up
comp81158_c0	6.15097e-09	5.06022	up
comp81447_c1	1.98963e-06	1.44559	up
comp815697_c0	3.47104e-05	4.43809	up
comp82700_c0	2.22045e-16	5.87125	up
comp83906_c0	2.56391e-06	3.37628	up
comp84315_c0	8.31203e-08	4.89569	up
comp85871_c0	2.6653e-06	1.15187	up
comp91344_c1	0.000135163	2.28917	up
comp921597_c0	0.000550732	4.1764	up
comp92903_c0	0.000274619	4.24641	up
comp93537_c0	0.000274619	4.24641	up
comp93936_c0	0.0060133	1.17515	up
comp95107_c0	0.00869778	1.06573	up
comp96359_c0	0.000132943	2.03849	up
comp98438_c0	0.000550732	4.1764	up
comp99037_c0	3.10862e-15	1.66737	up
comp100486_c0	0.000357711	-1.78529	down
comp100746_c0	0.0084909	-3.29434	down
comp100866_c0	2.36379e-06	-2.97349	down
comp100905_c0	0.000252676	-2.02378	down
comp100940_c0	5.21805e-15	-4.3196	down
comp101233_c0	8.6918e-10	-1.60569	down
comp101340_c0	0.000764368	-1.9951	down
comp102337_c0	9.88779e-05	-2.39739	down
comp103121_c0	0	-4.20517	down
comp103340_c0	1.63233e-09	-1.81127	down
comp103404_c0	0.00171111	-2.8304	down
comp103649_c0	6.66141e-06	-3.06867	down
comp104521_c0	0.00326113	-1.63586	down
comp104746_c0	9.07541e-12	-1.76273	down
comp104907_c0	2.04243e-11	-4.7203	down
comp104992_c0	3.37288e-09	-4.0221	down
comp105089_c0	0.000331963	-4.33367	down
comp105511_c0	0.00402792	-1.74418	down
comp106302_c0	0.0023842	-2.34245	down
comp106428_c0	0.000192818	-4.3875	down
comp107452_c0	0.000404728	-3.61265	down
comp107706_c0	0.00056454	-1.59869	down
comp107906_c0	0.00420063	-2.74374	down
comp108354_c0	3.37429e-08	-2.77725	down
comp109072_c0	2.08325e-06	-1.73914	down
comp109232_c0	6.136e-07	-1.86621	down
comp109261_c0	0.00171111	-2.8304	down
comp109579_c0	6.11997e-07	-1.93767	down
comp109668_c0	2.1056e-10	-2.1662	down
comp109829_c0	3.28656e-05	-3.83297	down
comp109919_c0	1.99703e-05	-3.87327	down
comp110062_c0	0.00541397	-1.72121	down
comp110137_c0	6.88037e-09	-2.7766	down
comp110356_c0	0.000961605	-1.12244	down
comp110551_c0	0.00633829	-1.23232	down
comp110690_c1	0.00245958	-1.42753	down
comp110793_c0	3.41901e-07	-1.86075	down
comp110905_c0	1.28026e-06	-3.66511	down
comp110942_c0	0.0035274	-2.30794	down
comp111073_c0	0.00185034	-3.46226	down
comp111217_c0	0.000112253	-4.43939	down
comp111217_c1	0	-3.63978	down
comp111353_c2	6.90949e-05	-1.26002	down
comp111388_c0	1.73217e-12	-2.22085	down
comp111468_c0	0.000224804	-3.27381	down
comp111520_c0	1.85142e-05	-2.83932	down
comp111671_c0	5.85354e-05	-1.86675	down
comp111719_c0	0.00959704	-2.11814	down
comp111845_c0	0.00095165	-1.50138	down
comp111855_c1	0	-2.28216	down
comp112018_c0	2.92341e-07	-2.66665	down
comp112045_c0	2.39616e-08	-2.43667	down
comp112137_c0	7.362e-12	-3.79637	down
comp112218_c0	0.00143297	-1.61977	down
comp112356_c0	1.03463e-05	-2.27256	down
comp112430_c0	1.84921e-06	-3.15224	down
comp112588_c0	0.000134371	-2.8525	down
comp112845_c0	4.46122e-05	-1.49096	down
comp113020_c0	1.05488e-05	-1.2087	down
comp113061_c1	4.22449e-05	-2.78196	down
comp113171_c0	2.90062e-09	-2.37436	down
comp113541_c0	8.84912e-08	-1.55388	down
comp113606_c0	2.70892e-10	-2.05364	down
comp113716_c0	3.51864e-06	-1.85541	down
comp113858_c0	2.05409e-09	-4.48051	down
comp113928_c0	0	-2.62029	down
comp113942_c0	0.00389187	-3.00509	down
comp113943_c0	3.08842e-12	-1.75177	down
comp114023_c0	4.89049e-11	-1.43044	down
comp114316_c0	1.56914e-05	-3.01014	down
comp114381_c2	0.0007183	-2.11112	down
comp114402_c0	4.06465e-08	-1.62192	down
comp114481_c0	0.00657013	-2.69837	down
comp114568_c0	1.08443e-05	-2.4611	down
comp114586_c1	1.20041e-07	-2.15256	down
comp114590_c0	2.64658e-11	-3.29379	down
comp114630_c0	0.00387132	-1.11596	down
comp114684_c0	5.43299e-08	-3.05459	down
comp114701_c0	1.01371e-06	-1.59136	down
comp114732_c0	6.61217e-08	-1.91508	down
comp115118_c0	0.000397601	-2.22132	down
comp115171_c0	7.32382e-05	-3.0983	down
comp115258_c0	0.00111393	-3.51415	down
comp115325_c0	1.36535e-12	-1.8861	down
comp115501_c2	2.69649e-08	-1.25976	down
comp115536_c0	0.00310721	-1.56685	down
comp115599_c0	2.77611e-08	-2.71049	down
comp115619_c0	0	-5.20323	down
comp115713_c0	2.6551e-10	-1.41928	down
comp115796_c0	9.44173e-06	-2.17979	down
comp115796_c1	9.40359e-14	-2.20353	down
comp115888_c0	7.5017e-05	-1.38746	down
comp115985_c0	0.00150408	-3.10033	down
comp116063_c0	2.23396e-05	-2.41623	down
comp116087_c0	3.5845e-05	-1.4286	down
comp116102_c0	2.30787e-08	-2.04069	down
comp116109_c0	0.000116204	-1.85458	down
comp116184_c1	0.000161521	-1.38162	down
comp116308_c0	6.36062e-07	-4.12764	down
comp116358_c0	0.00165296	-2.113	down
comp116556_c0	0.000331963	-4.33367	down
comp116677_c0	1.11134e-09	-1.56742	down
comp116775_c0	3.83316e-12	-2.36002	down
comp116787_c0	0.00625394	-2.95499	down
comp116796_c0	8.82231e-10	-4.0933	down
comp116948_c0	1.64254e-08	-1.68055	down
comp117007_c0	0.000134371	-2.8525	down
comp117093_c0	1.11022e-16	-3.12892	down
comp117103_c0	0	-3.11023	down
comp117211_c0	0.002654	-1.05452	down
comp117246_c0	0.00146677	-2.283	down
comp117250_c0	2.23437e-05	-2.49641	down
comp117299_c0	6.8423e-07	-1.52071	down
comp117459_c0	0	-2.81419	down
comp117585_c1	0.000671121	-3.56424	down
comp117597_c0	0.000934802	-3.1457	down
comp117630_c0	0.000572813	-4.27775	down
comp117663_c0	1.4469e-06	-1.51084	down
comp117774_c0	9.51263e-10	-2.9446	down
comp117867_c0	7.25054e-07	-1.37543	down
comp117908_c0	1.59852e-07	-2.62335	down
comp117970_c0	9.95354e-06	-1.11442	down
comp118128_c0	1.59347e-10	-2.11313	down
comp118130_c0	4.18347e-05	-2.24426	down
comp118228_c0	0	-2.36021	down
comp118254_c0	0.000244804	-1.66781	down
comp118298_c0	1.05093e-08	-3.668	down
comp118304_c0	0.00204698	-1.36715	down
comp118430_c0	8.61291e-09	-2.11984	down
comp118457_c0	8.5203e-05	-1.03455	down
comp118748_c0	5.77997e-07	-1.9211	down
comp118809_c0	3.67797e-08	-1.32516	down
comp118810_c1	0.000135504	-2.29753	down
comp118830_c0	0	-2.86461	down
comp118832_c0	0.000909063	-2.23483	down
comp118864_c0	4.4168e-05	-2.30279	down
comp118882_c0	8.93801e-05	-3.74884	down
comp118969_c0	1.22625e-09	-1.92146	down
comp118978_c0	8.05064e-07	-3.69594	down
comp119003_c0	0.00171111	-2.8304	down
comp119162_c0	5.79917e-05	-1.30468	down
comp119252_c0	4.30404e-09	-1.96675	down
comp119299_c0	1.47701e-07	-1.30581	down
comp119299_c1	0.000907637	-1.46316	down
comp119428_c0	0.000155847	-1.15322	down
comp119517_c0	8.7324e-06	-1.55938	down
comp119593_c0	9.77522e-05	-1.66543	down
comp119624_c0	3.98646e-08	-3.20934	down
comp119661_c0	0	-1.81318	down
comp119746_c0	0.0068727	-1.60751	down
comp119770_c0	1.72958e-07	-1.23275	down
comp119777_c0	2.41019e-06	-1.39092	down
comp119793_c0	9.45531e-05	-2.32206	down
comp119810_c0	6.21886e-06	-1.68863	down
comp119814_c0	1.9984e-15	-4.12071	down
comp119814_c1	2.357e-13	-4.92585	down
comp119814_c2	1.27676e-14	-4.59645	down
comp119924_c0	3.23134e-05	-1.7818	down
comp119971_c0	0.00389187	-3.00509	down
comp119981_c0	2.11342e-05	-2.28651	down
comp120090_c0	4.56413e-13	-3.91278	down
comp120213_c0	2.72745e-08	-1.43972	down
comp120214_c0	0.00351019	-1.28609	down
comp120286_c0	0	-3.28115	down
comp120309_c0	0	-2.89834	down
comp120332_c1	4.87698e-08	-1.82627	down
comp120351_c0	8.75996e-05	-1.87139	down
comp120378_c0	1.32296e-05	-3.50026	down
comp120421_c0	1.13409e-10	-2.38099	down
comp120446_c0	0.00389311	-2.41775	down
comp120497_c0	2.96652e-13	-1.98593	down
comp120536_c0	7.41161e-06	-2.29185	down
comp120536_c2	1.42424e-09	-1.36348	down
comp120623_c1	4.79763e-05	-1.40275	down
comp120667_c0	2.68296e-12	-1.5441	down
comp120738_c0	0.000194299	-1.45171	down
comp120788_c0	0	-2.53765	down
comp120829_c0	1.86517e-14	-1.63166	down
comp120849_c0	5.87336e-06	-1.89192	down
comp120858_c0	0.00875594	-2.34039	down
comp120886_c0	0	-4.61643	down
comp120908_c0	0.000662908	-1.41335	down
comp120936_c1	0.000113522	-1.03274	down
comp120990_c0	3.88578e-15	-2.09864	down
comp121015_c1	1.99703e-05	-3.87327	down
comp121034_c0	0.000671121	-3.56424	down
comp121062_c0	4.56413e-13	-3.91278	down
comp121140_c0	2.32523e-05	-1.20455	down
comp121152_c0	6.36062e-07	-4.12764	down
comp121158_c0	4.34464e-11	-1.51267	down
comp121198_c0	2.55212e-05	-1.12602	down
comp121285_c0	3.31062e-05	-1.29852	down
comp121325_c0	3.82843e-08	-1.89553	down
comp121327_c0	0.00234417	-1.86534	down
comp121390_c0	1.53868e-05	-1.43751	down
comp121393_c0	0.00298059	-4.0957	down
comp121402_c0	0.00560686	-1.94856	down
comp121474_c1	1.00907e-07	-1.22663	down
comp121478_c0	1.30415e-08	-3.94721	down
comp121507_c0	6.24626e-11	-4.22594	down
comp121507_c1	0.000749732	-2.71267	down
comp121555_c0	0	-2.27384	down
comp121565_c0	7.27862e-13	-1.5519	down
comp121574_c0	0.000253522	-2.18601	down
comp121641_c0	1.66533e-15	-1.68575	down
comp121653_c1	0.00394064	-1.10763	down
comp121661_c0	3.14577e-10	-2.6217	down
comp121661_c1	0.00465623	-1.90781	down
comp121676_c0	1.0892e-11	-2.75208	down
comp121718_c1	6.78346e-14	-2.58147	down
comp121752_c0	0.0053321	-1.32767	down
comp121754_c1	0.00351019	-1.28609	down
comp121763_c0	0.000776568	-1.90341	down
comp121821_c0	9.20843e-10	-1.49794	down
comp121827_c1	3.72895e-07	-2.73813	down
comp121835_c0	0.00014334	-1.18856	down
comp121884_c0	2.39909e-07	-1.51726	down
comp121999_c0	3.7228e-12	-1.81297	down
comp122035_c1	0	-2.96262	down
comp122051_c0	0	-2.39795	down
comp122057_c0	6.81992e-05	-2.42279	down
comp122080_c1	0.00118271	-1.19292	down
comp122110_c0	5.36776e-08	-1.66688	down
comp122112_c0	0.000233506	-1.78457	down
comp122152_c0	0	-4.70791	down
comp122198_c0	1.85142e-05	-2.83932	down
comp122225_c0	6.76954e-05	-2.62072	down
comp122243_c0	1.11022e-16	-2.55158	down
comp122247_c0	0.00123393	-2.01221	down
comp122250_c0	0.00962997	-1.15076	down
comp122335_c0	1.12252e-09	-2.44794	down
comp122343_c0	0	-3.9352	down
comp122354_c0	0.000300611	-2.3184	down
comp122397_c0	7.79096e-05	-2.01364	down
comp122410_c0	2.7305e-08	-1.96603	down
comp122410_c1	9.99985e-08	-1.73927	down
comp122412_c0	3.85247e-14	-1.7087	down
comp122447_c0	6.19412e-05	-1.53063	down
comp122451_c0	6.86684e-12	-2.23444	down
comp122475_c0	7.47085e-08	-2.47948	down
comp122577_c0	2.15452e-07	-2.18559	down
comp122644_c1	0	-2.25608	down
comp122666_c0	0.000990592	-4.21958	down
comp122682_c0	2.20974e-09	-3.53093	down
comp122743_c0	8.7419e-05	-2.88543	down
comp122817_c1	6.21089e-05	-1.1539	down
comp122819_c0	3.44007e-09	-1.95005	down
comp122824_c0	0.00319528	-1.25972	down
comp122833_c0	7.48076e-11	-1.74209	down
comp122889_c0	0.000237063	-1.17256	down
comp122918_c0	5.17616e-06	-2.26048	down
comp122921_c0	6.66141e-06	-3.06867	down
comp122921_c1	0	-4.25279	down
comp122931_c0	1.95282e-07	-1.22332	down
comp122943_c0	0.000117496	-1.79998	down
comp122965_c0	0	-2.8855	down
comp122998_c0	0.00234417	-1.86534	down
comp123041_c0	6.16369e-05	-1.12702	down
comp123043_c0	1.88738e-15	-1.74618	down
comp123159_c0	0.00895479	-1.85264	down
comp123177_c1	0.00290167	-1.59428	down
comp123240_c1	0	-1.75866	down
comp123251_c0	9.61365e-05	-2.08669	down
comp123313_c0	9.64205e-05	-2.72222	down
comp123366_c0	3.80164e-06	-2.32966	down
comp123379_c1	0.000764499	-1.82899	down
comp123383_c0	1.37554e-06	-1.25272	down
comp123403_c0	2.67853e-06	-1.93098	down
comp123435_c0	6.92214e-05	-1.78277	down
comp123474_c1	2.69237e-05	-1.85863	down
comp123484_c0	5.55112e-16	-3.08461	down
comp123534_c0	0.000323084	-1.12062	down
comp123540_c0	0.00275375	-1.20394	down
comp123591_c1	2.72256e-08	-1.86013	down
comp123591_c2	2.22045e-16	-3.52268	down
comp123661_c0	3.19417e-07	-3.75568	down
comp123674_c1	0.00392123	-2.11529	down
comp123683_c0	1.39252e-07	-1.5917	down
comp123742_c0	2.9977e-06	-1.35964	down
comp123762_c0	2.22045e-16	-3.61898	down
comp123788_c1	3.05758e-06	-1.13894	down
comp123802_c0	0.000135504	-2.29753	down
comp123810_c0	3.81101e-07	-2.39913	down
comp123854_c0	0.00147631	-1.36655	down
comp123893_c1	0.0090274	-1.58623	down
comp123926_c0	6.52437e-05	-1.19264	down
comp123937_c1	0.000108736	-1.10026	down
comp123941_c0	1.89019e-08	-1.76905	down
comp124046_c0	8.28655e-06	-1.08377	down
comp124127_c0	1.68667e-07	-1.32423	down
comp124153_c0	4.95664e-08	-1.68257	down
comp124162_c0	3.97365e-05	-1.53284	down
comp124174_c0	1.10142e-06	-2.04882	down
comp124177_c0	0.0035071	-1.51725	down
comp124215_c0	1.61288e-05	-1.04783	down
comp124288_c0	0.00122548	-1.02173	down
comp124292_c1	7.82144e-05	-1.71381	down
comp124345_c0	0	-3.04389	down
comp124356_c0	1.61204e-13	-2.9026	down
comp124439_c0	0.00178311	-1.54404	down
comp124476_c0	0	-2.11635	down
comp124492_c1	6.25823e-07	-1.49722	down
comp124542_c0	0.000307401	-1.76756	down
comp124561_c0	2.38364e-09	-1.57169	down
comp124602_c0	1.01371e-06	-1.59136	down
comp124606_c0	8.33752e-05	-1.47724	down
comp124622_c0	0.00392123	-2.11529	down
comp124638_c0	8.29028e-06	-1.07046	down
comp124654_c0	0.000270212	-1.64294	down
comp124686_c3	0.00100056	-1.1336	down
comp124688_c0	0.000471203	-1.07161	down
comp124699_c1	2.81069e-05	-2.2131	down
comp124721_c1	0.000317492	-2.78428	down
comp124788_c0	0.00334817	-2.05564	down
comp124849_c0	1.87908e-10	-2.45009	down
comp124881_c0	6.88037e-09	-2.7766	down
comp124927_c0	1.69148e-06	-1.9767	down
comp124967_c0	0.00448396	-1.50003	down
comp124974_c0	4.57412e-11	-2.4421	down
comp124987_c0	0.00927116	-1.32517	down
comp124991_c0	0.000343518	-1.05886	down
comp125000_c0	6.7425e-12	-1.51433	down
comp125014_c0	3.37756e-07	-1.50842	down
comp125014_c1	4.72067e-13	-1.60066	down
comp125043_c0	2.64026e-10	-1.6236	down
comp125051_c0	3.56537e-06	-2.94763	down
comp125097_c0	7.61613e-14	-1.56924	down
comp125110_c0	2.05201e-08	-3.92136	down
comp125122_c0	0.000206551	-2.81879	down
comp125157_c0	3.47377e-07	-2.51689	down
comp125157_c1	2.11683e-05	-3.4649	down
comp125169_c0	1.04914e-08	-2.20408	down
comp125169_c1	3.45425e-05	-1.98867	down
comp125213_c0	1.16598e-05	-1.71288	down
comp125225_c0	4.6104e-05	-2.08704	down
comp125225_c1	0	-2.38273	down
comp125255_c0	6.32584e-09	-2.19978	down
comp125286_c2	1.06657e-05	-2.32755	down
comp125296_c0	5.38902e-13	-1.51021	down
comp125327_c0	0.000209552	-1.22786	down
comp125333_c0	0.000609669	-1.26546	down
comp125350_c0	3.35964e-05	-2.10608	down
comp125355_c0	0.00364321	-1.14361	down
comp125356_c1	1.28315e-07	-1.46594	down
comp125358_c0	4.87079e-07	-1.60098	down
comp125362_c0	3.05206e-10	-2.91513	down
comp125410_c0	0	-6.13772	down
comp125412_c1	0.00102759	-1.80862	down
comp125427_c0	2.07021e-11	-3.57286	down
comp125432_c0	5.78055e-10	-1.89271	down
comp125450_c0	3.52536e-08	-1.43445	down
comp125467_c1	0.00908103	-1.20892	down
comp125471_c0	0.00127573	-1.10099	down
comp125491_c1	6.66134e-16	-1.83782	down
comp125516_c0	0.00280188	-1.89776	down
comp125520_c0	0.00251471	-1.18806	down
comp125524_c0	3.35303e-05	-1.56137	down
comp125524_c2	1.15463e-14	-2.48431	down
comp125524_c3	1.48517e-09	-3.01358	down
comp125524_c4	1.67033e-12	-2.19598	down
comp125537_c1	0.00101745	-1.03157	down
comp125549_c0	3.7677e-11	-2.36993	down
comp125590_c0	5.37933e-09	-1.97157	down
comp125590_c1	0.000100728	-2.59233	down
comp125594_c0	1.1027e-09	-1.37973	down
comp125599_c0	1.37312e-06	-2.01165	down
comp125600_c0	0.000114985	-1.71162	down
comp125605_c0	3.66544e-06	-2.5259	down
comp125618_c0	7.89172e-07	-3.20538	down
comp125622_c0	5.20347e-08	-1.30464	down
comp125719_c0	0	-3.67897	down
comp125800_c1	0.00102759	-1.80862	down
comp125847_c0	0.000111469	-1.32536	down
comp125852_c1	0	-2.19751	down
comp125901_c0	1.09023e-11	-1.50064	down
comp125971_c1	0	-2.10716	down
comp125995_c0	1.32783e-13	-2.35919	down
comp126012_c0	2.23698e-08	-1.40675	down
comp126048_c0	0.00625394	-2.95499	down
comp126065_c0	0.00217007	-1.29067	down
comp126089_c0	1.13788e-05	-1.2941	down
comp126118_c0	0.000242832	-1.20542	down
comp126162_c0	0	-3.57577	down
comp126169_c0	3.34827e-10	-2.14955	down
comp126213_c0	2.34331e-08	-1.88953	down
comp126235_c0	0	-1.97994	down
comp126239_c0	0.000978166	-1.27395	down
comp126287_c0	0	-4.16189	down
comp126295_c1	1.26678e-08	-1.31103	down
comp126320_c1	2.22045e-16	-1.72806	down
comp126332_c1	1.73813e-07	-1.5373	down
comp126352_c0	0.000214105	-1.33011	down
comp126358_c0	9.07174e-07	-2.11675	down
comp126384_c0	0.000428674	-1.03127	down
comp126406_c0	1.68813e-10	-2.24903	down
comp126418_c1	1.62051e-11	-1.91451	down
comp126451_c0	0	-3.18681	down
comp126451_c1	9.52571e-14	-3.9753	down
comp126486_c0	5.94174e-05	-1.56557	down
comp126488_c0	0.00584445	-2.37959	down
comp126528_c0	0.00196221	-1.83662	down
comp126541_c0	0.00212128	-1.3546	down
comp126561_c0	6.24111e-05	-1.95403	down
comp126571_c0	0.000197131	-1.72221	down
comp126571_c1	0.00446462	-1.32842	down
comp126571_c2	2.26187e-06	-2.10313	down
comp126623_c0	1.29596e-10	-2.81613	down
comp126642_c0	6.33768e-10	-1.53482	down
comp126668_c0	5.87371e-06	-1.14741	down
comp126694_c0	2.44249e-15	-1.97106	down
comp126785_c0	0.00271437	-1.07925	down
comp126809_c0	2.72782e-13	-2.75491	down
comp126809_c1	2.51942e-06	-1.49338	down
comp126813_c1	0	-3.12744	down
comp126828_c0	4.44089e-16	-1.94743	down
comp126870_c0	1.18172e-12	-1.69711	down
comp126942_c0	0.00120652	-1.33317	down
comp126956_c0	9.59877e-12	-2.91894	down
comp126980_c0	7.19313e-13	-2.85063	down
comp126987_c0	2.61051e-07	-1.45987	down
comp127059_c0	5.11069e-07	-1.64123	down
comp127094_c0	2.01489e-05	-2.2332	down
comp127095_c1	7.43431e-07	-1.35487	down
comp127096_c0	3.62279e-11	-1.46778	down
comp127106_c0	1.80811e-05	-1.05637	down
comp127175_c0	3.32313e-11	-1.42068	down
comp127194_c0	2.55351e-15	-3.21002	down
comp127209_c0	2.33646e-06	-1.12105	down
comp127210_c0	1.66263e-08	-1.27085	down
comp127215_c1	0	-2.13338	down
comp127222_c0	1.02344e-09	-1.50512	down
comp127233_c0	0.00956234	-1.5549	down
comp127238_c0	1.68371e-05	-1.04787	down
comp127252_c0	1.02899e-10	-1.45214	down
comp127295_c0	7.08542e-06	-1.76835	down
comp127305_c1	0.00290667	-1.09212	down
comp127318_c0	0.00666965	-1.19974	down
comp127326_c0	0	-2.73724	down
comp127330_c0	5.26105e-09	-4.42738	down
comp127349_c0	7.46106e-06	-1.28702	down
comp127357_c0	0.000195422	-1.12712	down
comp127368_c0	3.79344e-05	-1.31269	down
comp127412_c0	8.17072e-06	-1.32512	down
comp127417_c1	5.59481e-06	-1.45996	down
comp127426_c0	5.66847e-10	-2.09805	down
comp127453_c0	3.65853e-11	-2.04048	down
comp127493_c0	2.22045e-16	-2.25578	down
comp127496_c0	1.09701e-12	-1.52285	down
comp127521_c0	1.0581e-06	-1.14281	down
comp127531_c0	9.82979e-07	-1.84504	down
comp127611_c0	0	-2.27491	down
comp127663_c0	1.83272e-10	-2.1384	down
comp127675_c1	3.31175e-06	-1.17813	down
comp127681_c0	1.10402e-11	-1.72072	down
comp127702_c1	0.00606998	-1.35452	down
comp127722_c0	5.01547e-06	-1.08477	down
comp127725_c0	7.59328e-09	-1.28199	down
comp127806_c0	9.96325e-12	-2.19243	down
comp127823_c0	0.00776373	-1.20414	down
comp127876_c0	0	-2.35591	down
comp127879_c0	0.000192602	-1.03465	down
comp127880_c0	3.27416e-12	-3.27297	down
comp127880_c1	0	-3.56366	down
comp127909_c0	1.84921e-06	-3.15224	down
comp127937_c0	5.43811e-05	-1.58195	down
comp127938_c0	3.11037e-05	-2.32505	down
comp127958_c1	2.061e-05	-1.41356	down
comp127986_c1	2.18772e-06	-1.71223	down
comp127988_c0	0.000715137	-1.35466	down
comp127990_c0	0	-2.51515	down
comp128061_c2	0.000314562	-1.65291	down
comp128093_c0	2.26196e-05	-1.60258	down
comp128100_c0	1.37312e-06	-2.01165	down
comp128125_c0	1.45e-07	-1.28658	down
comp128130_c1	2.55196e-07	-1.28457	down
comp128165_c0	5.55112e-16	-1.98485	down
comp128216_c0	2.58793e-13	-1.88046	down
comp128218_c1	0.00364249	-1.68504	down
comp128273_c1	0.000240575	-1.4698	down
comp128282_c0	0	-2.76809	down
comp128338_c0	0	-2.95453	down
comp128381_c0	1.53317e-11	-2.17823	down
comp128405_c0	2.47358e-13	-1.65877	down
comp128418_c0	1.19313e-06	-1.63829	down
comp128418_c1	2.05616e-05	-1.09776	down
comp128457_c1	0.000118399	-1.55335	down
comp128479_c0	7.84098e-05	-1.18662	down
comp128486_c0	0.000285596	-2.06403	down
comp128500_c0	0	-3.95498	down
comp128562_c2	0.00143206	-2.05894	down
comp128620_c0	0	-3.88172	down
comp128655_c0	0.000227373	-1.16767	down
comp128700_c0	2.56761e-08	-1.27954	down
comp128710_c0	1.30112e-07	-1.45283	down
comp128714_c0	6.97891e-09	-1.36329	down
comp128744_c9	0.00427744	-1.61604	down
comp128746_c0	2.18977e-05	-2.34698	down
comp128767_c0	7.54137e-06	-1.09484	down
comp128846_c0	1.46359e-08	-1.35494	down
comp128847_c0	5.20914e-11	-1.41273	down
comp128872_c0	2.18293e-05	-1.17622	down
comp128872_c1	1.05293e-08	-1.37948	down
comp128909_c0	3.08705e-07	-1.53741	down
comp128927_c0	0.00784344	-1.19633	down
comp128949_c0	5.16056e-08	-1.53991	down
comp128955_c0	6.16761e-05	-1.58775	down
comp128955_c1	4.27762e-10	-2.23586	down
comp128962_c0	0.000134483	-1.818	down
comp128986_c0	0.0038644	-1.87236	down
comp129009_c0	0.000283399	-1.24161	down
comp129034_c0	3.71106e-05	-1.19605	down
comp129036_c0	2.90707e-11	-1.57413	down
comp129045_c1	5.8229e-12	-1.85276	down
comp129050_c0	0	-2.32143	down
comp129056_c0	0	-2.41606	down
comp129067_c0	3.50926e-10	-1.52959	down
comp129070_c0	0.00066472	-1.60725	down
comp129074_c0	1.0798e-05	-1.60561	down
comp129101_c1	0	-1.87187	down
comp129145_c3	1.33338e-13	-2.12069	down
comp129148_c2	0.00116009	-1.76715	down
comp129148_c3	9.98501e-07	-1.13839	down
comp129161_c2	0.00396281	-1.64915	down
comp129167_c0	1.43364e-06	-1.40505	down
comp129172_c0	1.55431e-15	-1.78573	down
comp129182_c0	3.20786e-07	-1.22752	down
comp129201_c0	0.000354753	-1.0268	down
comp129203_c0	0.000306192	-1.2856	down
comp129212_c0	0.00114133	-2.52654	down
comp129220_c0	4.56413e-13	-1.62577	down
comp129241_c0	0	-4.30627	down
comp129246_c0	0.000909063	-2.23483	down
comp129311_c1	3.06472e-07	-1.33665	down
comp129314_c0	0.00330645	-1.38247	down
comp129361_c1	1.87398e-05	-1.12853	down
comp129376_c0	5.5723e-05	-1.92815	down
comp129403_c0	1.30415e-08	-3.94721	down
comp129408_c0	6.88338e-15	-1.63516	down
comp129486_c0	1.65093e-11	-3.43644	down
comp129512_c0	3.93756e-11	-2.41965	down
comp129521_c0	0.000803038	-1.32499	down
comp129547_c0	0.00513699	-1.43756	down
comp129549_c0	1.16813e-06	-1.29475	down
comp129568_c0	0	-2.33804	down
comp129616_c0	5.43398e-05	-3.39148	down
comp129678_c0	1.00207e-08	-1.31492	down
comp129705_c1	1.89556e-11	-1.55631	down
comp129706_c0	8.28893e-13	-1.71333	down
comp129714_c0	0.00101037	-1.4834	down
comp129720_c0	0.00533924	-1.41909	down
comp129756_c0	5.53434e-07	-1.1794	down
comp129756_c1	5.95031e-08	-1.29399	down
comp129772_c0	0.000257161	-1.39412	down
comp129780_c0	6.94247e-08	-1.43048	down
comp129783_c0	1.61723e-06	-1.31772	down
comp129789_c0	0.00103404	-1.37783	down
comp129811_c0	7.51051e-10	-1.34683	down
comp129882_c0	1.14883e-06	-1.56627	down
comp129882_c1	6.14342e-05	-1.19889	down
comp129884_c0	0	-4.1508	down
comp129917_c0	0	-2.90026	down
comp129938_c0	0	-2.1956	down
comp129958_c0	4.8356e-06	-1.72682	down
comp129993_c0	0	-1.72472	down
comp130026_c0	4.45968e-06	-1.12538	down
comp130027_c0	0.00322239	-1.14212	down
comp130062_c0	0.00283067	-1.3082	down
comp130062_c2	0.00272626	-2.14612	down
comp130121_c2	3.69152e-09	-1.53396	down
comp130154_c0	0	-2.17817	down
comp130154_c1	5.79614e-12	-1.98614	down
comp130173_c0	3.81646e-06	-1.24574	down
comp130180_c0	0.00197157	-1.4417	down
comp130180_c1	1.11022e-16	-1.82636	down
comp130190_c1	0.000535217	-1.24305	down
comp130205_c5	0.00125939	-1.36627	down
comp130207_c1	0.0068727	-1.60751	down
comp130209_c0	0	-1.83394	down
comp130223_c0	3.04202e-06	-1.15381	down
comp130267_c1	2.25115e-05	-1.19493	down
comp130269_c0	3.77741e-11	-1.46647	down
comp130280_c0	0.000108757	-1.04609	down
comp130309_c3	3.87135e-12	-1.68535	down
comp130316_c0	5.52003e-13	-1.53713	down
comp130317_c0	0	-2.34078	down
comp130343_c0	5.94174e-05	-1.56557	down
comp130351_c1	0.000899418	-1.85385	down
comp130379_c0	1.26971e-08	-1.43897	down
comp130395_c0	0.00732581	-1.57557	down
comp130418_c1	0	-2.52083	down
comp130427_c0	3.94572e-07	-1.22501	down
comp130529_c0	5.86117e-06	-1.37129	down
comp130536_c0	2.55351e-15	-1.71317	down
comp130538_c0	0.00136207	-1.01455	down
comp130558_c1	4.69624e-13	-1.65788	down
comp130565_c0	0.00251479	-1.01939	down
comp130619_c0	0.00235414	-2.08461	down
comp130620_c2	3.44167e-05	-1.02716	down
comp130628_c0	2.29761e-12	-3.28687	down
comp130628_c2	0.000332247	-2.62769	down
comp130646_c0	6.68318e-08	-1.28741	down
comp130679_c0	3.3906e-09	-2.08062	down
comp130682_c0	5.72098e-13	-1.59589	down
comp130693_c0	1.06962e-09	-2.10707	down
comp130697_c0	3.95082e-05	-1.86251	down
comp130708_c0	7.00948e-05	-1.59386	down
comp130709_c0	7.57718e-07	-1.46614	down
comp130717_c0	0.000349225	-1.0942	down
comp130775_c0	1.04979e-06	-1.47297	down
comp130782_c2	1.3789e-13	-2.46733	down
comp130809_c0	3.55738e-05	-1.0691	down
comp130816_c0	1.7443e-06	-1.62211	down
comp130838_c0	0.00475272	-1.14161	down
comp130841_c0	4.06934e-09	-1.62646	down
comp130845_c0	7.25816e-05	-1.2872	down
comp130892_c0	0.00389187	-3.00509	down
comp130913_c0	0.00048579	-1.03186	down
comp130936_c0	2.79004e-10	-1.60535	down
comp130940_c0	7.34521e-05	-1.55462	down
comp130948_c0	0	-1.72163	down
comp130962_c2	0	-3.11579	down
comp131025_c0	0	-4.15122	down
comp131032_c0	8.53336e-06	-1.15221	down
comp131034_c0	2.10971e-09	-1.4799	down
comp131066_c1	0	-2.15013	down
comp131066_c2	7.14173e-12	-1.61032	down
comp131122_c0	4.34323e-06	-3.09706	down
comp131150_c0	3.4364e-08	-1.95677	down
comp131152_c0	7.94924e-05	-1.43858	down
comp131196_c0	7.36268e-08	-1.86927	down
comp131226_c0	0.000347729	-1.1913	down
comp131241_c0	0.000228176	-1.73617	down
comp131283_c0	0.000237861	-1.254	down
comp131296_c0	0.00163604	-1.03044	down
comp131351_c0	0.00506591	-1.03329	down
comp131365_c0	3.61542e-07	-1.44509	down
comp131402_c0	0.000313182	-1.88845	down
comp131410_c0	0.0016659	-1.10486	down
comp131419_c3	0.00895479	-1.85264	down
comp131434_c0	0.000903373	-1.07273	down
comp131544_c0	5.82208e-10	-2.08188	down
comp131546_c0	0	-3.49292	down
comp131575_c2	0.000232487	-1.19889	down
comp131575_c4	0.000381639	-1.02019	down
comp131581_c0	7.78993e-05	-1.14705	down
comp131593_c0	0.00124662	-1.91241	down
comp131602_c0	1.34172e-06	-1.66951	down
comp131628_c0	4.0249e-08	-1.26673	down
comp131644_c0	0	-3.2662	down
comp131652_c0	0.00189076	-1.05031	down
comp131656_c3	0.000107448	-1.48267	down
comp131657_c0	4.72506e-11	-1.42779	down
comp131666_c0	6.84557e-05	-1.05303	down
comp131746_c0	0	-1.97661	down
comp131751_c1	0	-5.18456	down
comp131782_c0	1.33724e-05	-1.28521	down
comp131800_c0	0	-2.44457	down
comp131806_c0	0.00888155	-1.05373	down
comp131828_c0	6.02296e-13	-1.5773	down
comp131830_c0	0	-1.94482	down
comp131842_c1	4.48996e-05	-1.05901	down
comp131958_c0	0.000907561	-1.93539	down
comp131986_c2	1.17565e-07	-1.36068	down
comp132008_c0	3.27701e-10	-2.34127	down
comp132023_c0	0.000640046	-1.13269	down
comp132059_c0	0.000145729	-1.31734	down
comp132069_c0	2.95008e-11	-1.46558	down
comp132082_c0	2.10942e-15	-1.88585	down
comp132108_c0	0.00814517	-1.76633	down
comp132159_c0	0.00895178	-1.71792	down
comp132168_c1	0.00140289	-1.248	down
comp132194_c0	2.46138e-08	-1.61647	down
comp132210_c0	0	-2.41235	down
comp132240_c0	1.24628e-07	-1.34674	down
comp132259_c0	6.93476e-08	-1.3133	down
comp132259_c1	3.5727e-13	-1.52386	down
comp132260_c0	1.92434e-09	-1.39872	down
comp132269_c0	0.00519813	-1.25301	down
comp132274_c1	0.00417149	-1.02856	down
comp132285_c1	6.65722e-08	-1.38427	down
comp132286_c1	0.00390048	-1.17286	down
comp132307_c0	4.88498e-15	-1.8004	down
comp132319_c2	0.000251564	-1.05112	down
comp132393_c1	1.14775e-10	-1.41326	down
comp132412_c0	2.49134e-13	-1.59226	down
comp132412_c1	0	-2.31203	down
comp132422_c0	4.52159e-06	-1.52155	down
comp132438_c0	6.4018e-10	-1.33923	down
comp132441_c0	1.65825e-10	-1.38684	down
comp132461_c0	0	-2.58276	down
comp132478_c0	1.27293e-06	-1.13176	down
comp132488_c0	7.9492e-14	-2.35908	down
comp132490_c0	6.57253e-07	-1.18036	down
comp132500_c0	3.6684e-07	-2.45472	down
comp132500_c1	6.80567e-13	-2.26384	down
comp132501_c0	6.99832e-11	-1.69216	down
comp132506_c0	0.00183788	-1.10516	down
comp132507_c0	0	-3.36792	down
comp132514_c1	2.54775e-08	-2.39149	down
comp132516_c0	0.00254025	-1.28921	down
comp132538_c0	5.98284e-09	-1.44044	down
comp132539_c0	1.52889e-06	-1.41175	down
comp132577_c0	0	-3.35734	down
comp132616_c0	0	-1.75843	down
comp132656_c0	0	-2.68519	down
comp132659_c0	4.44089e-16	-1.88263	down
comp132660_c0	7.20613e-10	-1.39528	down
comp132695_c2	2.24557e-05	-1.17406	down
comp132733_c0	9.45144e-05	-1.10871	down
comp132736_c0	1.39703e-07	-1.36086	down
comp132737_c0	7.78562e-08	-1.24039	down
comp132747_c0	2.72717e-10	-1.49883	down
comp132749_c0	0.000893496	-1.18036	down
comp132795_c0	5.07825e-10	-1.43655	down
comp132807_c0	9.01481e-06	-1.13642	down
comp132870_c0	1.05006e-07	-1.64171	down
comp132898_c0	1.00954e-09	-1.91847	down
comp132922_c0	1.10444e-08	-1.63565	down
comp132930_c0	0	-2.10942	down
comp132930_c1	0	-2.80852	down
comp132937_c0	2.2464e-05	-1.04502	down
comp132977_c0	2.69608e-05	-1.11385	down
comp132980_c0	0	-1.86037	down
comp133010_c0	1.76347e-05	-1.16889	down
comp133038_c0	0.000115742	-1.01385	down
comp133039_c1	0.00444595	-1.04758	down
comp133058_c0	0.000119477	-1.62189	down
comp133061_c0	1.19653e-09	-1.74886	down
comp133084_c0	2.12711e-05	-1.08681	down
comp133110_c0	6.60014e-05	-1.03911	down
comp133130_c0	1.03959e-09	-1.35944	down
comp133264_c0	5.40413e-05	-1.06046	down
comp133271_c0	2.832e-09	-1.3673	down
comp133300_c2	0.000103849	-1.06327	down
comp133312_c0	0.00568459	-1.1135	down
comp133334_c1	2.67157e-07	-1.22555	down
comp133346_c0	3.26709e-08	-1.34654	down
comp133397_c0	0.00152561	-1.1878	down
comp133439_c1	0.0097274	-1.67413	down
comp133467_c0	8.58305e-09	-2.52911	down
comp133517_c0	2.9976e-14	-1.64932	down
comp133528_c0	0	-2.28324	down
comp133532_c1	7.55502e-08	-1.23959	down
comp133577_c0	0	-2.90271	down
comp133624_c1	5.24369e-06	-1.19114	down
comp133641_c1	0.00495817	-1.04658	down
comp133676_c0	1.08443e-05	-2.4611	down
comp133676_c2	3.45279e-13	-1.52007	down
comp133682_c0	3.2776e-05	-1.34192	down
comp133688_c0	8.34444e-13	-1.70105	down
comp133689_c0	1.77636e-15	-1.64345	down
comp133702_c0	0.00475055	-1.01178	down
comp133731_c0	3.93778e-08	-2.69348	down
comp133735_c0	0	-3.97428	down
comp133739_c0	1.76825e-05	-1.0611	down
comp133747_c2	0.000349083	-1.01351	down
comp133748_c0	7.46666e-05	-1.0157	down
comp133752_c1	0	-2.39963	down
comp133785_c1	8.95222e-11	-1.89358	down
comp133820_c1	2.83839e-10	-1.36123	down
comp133830_c0	1.46567e-07	-1.26928	down
comp133855_c0	0.00694359	-1.17148	down
comp133900_c0	3.01587e-10	-1.36156	down
comp133963_c0	9.15878e-12	-2.8617	down
comp133963_c1	0	-3.36254	down
comp133983_c0	0.000633293	-1.03466	down
comp133994_c0	0	-2.60406	down
comp134000_c0	1.28933e-10	-1.55726	down
comp134005_c0	3.3229e-13	-2.48285	down
comp134035_c0	2.25586e-11	-1.94421	down
comp134103_c0	0.00311378	-1.06683	down
comp134123_c0	1.5197e-05	-1.20406	down
comp134136_c1	0.000698315	-1.29229	down
comp134157_c0	0.000331963	-4.33367	down
comp134158_c0	1.40047e-08	-1.41936	down
comp134175_c1	6.16e-08	-1.68104	down
comp134200_c0	8.56286e-08	-1.24824	down
comp134205_c0	7.77008e-05	-1.21795	down
comp134208_c0	6.46071e-06	-1.24473	down
comp134239_c0	0	-2.018	down
comp134277_c0	1.0478e-08	-1.43067	down
comp134277_c3	1.03466e-08	-1.94666	down
comp134302_c0	0.00136169	-1.39196	down
comp134323_c0	3.26114e-05	-1.02415	down
comp134345_c0	5.12125e-07	-1.444	down
comp134370_c0	4.81216e-06	-1.33588	down
comp134378_c0	0.0040994	-1.21653	down
comp134468_c1	0.00189514	-1.00099	down
comp134503_c0	7.42453e-08	-1.20972	down
comp134508_c0	0.000416881	-1.80463	down
comp134512_c0	4.21885e-15	-1.62593	down
comp134542_c0	0.00959704	-2.11814	down
comp134556_c0	0	-1.96545	down
comp134588_c0	0.00290167	-1.59428	down
comp134591_c1	5.67438e-11	-1.4745	down
comp134600_c0	7.18174e-07	-1.14776	down
comp134601_c0	5.20369e-06	-1.24132	down
comp134621_c0	2.88658e-14	-1.58428	down
comp134648_c0	0	-2.86317	down
comp134655_c0	1.51493e-05	-1.25112	down
comp134686_c0	7.87109e-06	-1.07553	down
comp134714_c0	0.000108038	-1.45537	down
comp134718_c0	8.28133e-10	-1.51634	down
comp134721_c2	0.00212782	-1.48095	down
comp134762_c1	0.000695112	-1.08031	down
comp134762_c2	4.85306e-05	-1.21663	down
comp134773_c1	4.18585e-05	-1.69449	down
comp134774_c0	8.73242e-08	-1.21061	down
comp134814_c0	0	-2.20342	down
comp134832_c0	1.68131e-07	-1.18795	down
comp134863_c0	7.72572e-05	-1.08925	down
comp134877_c0	0.000695816	-1.40067	down
comp134902_c0	2.54423e-06	-1.13855	down
comp134924_c0	7.15283e-05	-1.00344	down
comp134928_c4	0.00056137	-1.54851	down
comp134959_c1	6.66134e-16	-1.86977	down
comp135019_c0	1.19873e-05	-1.19939	down
comp135024_c0	4.2905e-11	-1.48067	down
comp135027_c1	0.000125493	-1.14947	down
comp135045_c0	0.000644641	-1.09208	down
comp135085_c0	4.65328e-12	-1.46446	down
comp135111_c0	7.4558e-06	-1.27737	down
comp135122_c0	0.000153096	-1.07107	down
comp135174_c0	1.24496e-10	-1.65987	down
comp135194_c2	5.81219e-09	-1.3089	down
comp135228_c0	1.32117e-14	-1.60638	down
comp135235_c1	1.29154e-05	-1.15872	down
comp135238_c0	1.48052e-06	-2.75676	down
comp135239_c0	2.25286e-12	-1.47736	down
comp135249_c0	5.9952e-15	-1.64289	down
comp135261_c0	5.807e-11	-1.81541	down
comp135276_c0	9.5267e-11	-1.45942	down
comp135288_c1	4.88949e-07	-1.7779	down
comp135305_c0	1.32585e-09	-1.34166	down
comp135322_c1	1.04088e-07	-1.46813	down
comp135328_c1	1.39672e-07	-1.24442	down
comp135336_c0	0	-2.77889	down
comp135339_c2	3.44297e-05	-1.03552	down
comp135361_c0	0.00695487	-1.04934	down
comp135427_c0	1.69309e-13	-1.68209	down
comp135431_c0	4.44667e-12	-1.49375	down
comp135456_c2	1.33965e-08	-1.25865	down
comp135470_c0	0	-3.18049	down
comp135489_c0	0.000124054	-1.20677	down
comp135515_c0	8.80316e-06	-1.26363	down
comp135542_c0	2.86742e-07	-1.88368	down
comp135581_c0	3.50401e-10	-1.36473	down
comp135591_c2	8.98719e-10	-1.52304	down
comp135653_c0	3.88578e-15	-1.68466	down
comp135712_c0	0	-2.07614	down
comp135713_c0	6.49079e-06	-1.08093	down
comp135720_c3	0.00697338	-1.04628	down
comp135781_c1	0	-3.88109	down
comp135781_c2	2.94309e-12	-3.3837	down
comp135781_c3	3.89185e-07	-2.94656	down
comp135806_c0	0.000158253	-1.03361	down
comp135835_c0	0.0024216	-1.36748	down
comp135898_c0	6.96589e-07	-1.71769	down
comp135905_c0	3.10481e-10	-1.47677	down
comp135919_c0	0.00729271	-1.24798	down
comp135947_c1	4.35302e-06	-1.11102	down
comp135963_c1	3.45622e-09	-1.33458	down
comp135976_c1	3.19618e-08	-1.43767	down
comp136036_c1	2.27688e-09	-1.30478	down
comp136101_c0	0.00730021	-1.46497	down
comp136106_c0	8.40946e-10	-1.44125	down
comp136112_c0	0.00293388	-1.08873	down
comp136117_c0	1.11022e-16	-1.71095	down
comp136136_c0	4.43365e-08	-1.32568	down
comp136166_c0	0.00150408	-3.10033	down
comp136169_c0	1.33227e-15	-2.06467	down
comp136226_c0	1.00586e-05	-1.12762	down
comp136260_c0	9.99201e-16	-1.74934	down
comp136291_c0	9.34045e-07	-1.23622	down
comp136311_c0	2.70836e-10	-1.42039	down
comp136311_c1	7.67229e-05	-1.22812	down
comp136311_c2	2.08083e-07	-1.52255	down
comp136340_c0	1.28934e-06	-1.64362	down
comp136384_c0	6.72242e-05	-1.05755	down
comp136384_c1	4.06584e-08	-1.24362	down
comp136433_c0	9.22906e-12	-1.88619	down
comp136443_c0	0.000137557	-1.11699	down
comp136461_c0	7.94245e-08	-1.26204	down
comp136476_c0	3.26848e-05	-1.2505	down
comp136497_c0	5.21361e-13	-2.04351	down
comp136523_c0	6.28205e-08	-1.35745	down
comp136527_c0	0.00861651	-1.10583	down
comp136629_c0	4.4729e-11	-1.52849	down
comp136686_c0	0	-2.27173	down
comp136708_c0	4.98612e-12	-1.4575	down
comp136804_c0	0	-2.56141	down
comp136837_c0	5.46351e-09	-1.51004	down
comp136839_c1	2.1142e-08	-1.32968	down
comp136856_c0	2.89552e-09	-1.5752	down
comp136916_c0	0	-2.47473	down
comp136947_c0	5.23065e-11	-1.41248	down
comp136952_c0	3.09143e-05	-1.22393	down
comp136965_c2	4.72854e-10	-1.41918	down
comp136969_c0	8.31557e-14	-2.06883	down
comp136982_c0	3.73035e-14	-1.596	down
comp137020_c0	0	-2.44675	down
comp137068_c0	0.00552031	-1.13274	down
comp137068_c1	1.37715e-07	-1.32317	down
comp137161_c1	0.00037776	-1.60515	down
comp137163_c0	1.65708e-05	-1.6542	down
comp137167_c0	3.69682e-05	-1.39236	down
comp137174_c0	6.32906e-11	-1.76943	down
comp137191_c0	0	-2.03222	down
comp137195_c1	1.16069e-10	-3.23058	down
comp137223_c2	0.00081951	-1.22546	down
comp137275_c0	1.65053e-05	-1.05541	down
comp137288_c0	1.86289e-06	-1.16874	down
comp137292_c0	1.65264e-09	-1.35397	down
comp137292_c1	1.76166e-06	-1.26394	down
comp137315_c0	3.66685e-06	-1.20909	down
comp137326_c0	1.78202e-12	-1.68755	down
comp137326_c1	1.09472e-09	-2.08979	down
comp137343_c0	4.29362e-06	-1.13733	down
comp137359_c0	1.71672e-05	-1.26184	down
comp137360_c0	1.0858e-13	-1.65351	down
comp137411_c0	2.635e-12	-1.59031	down
comp137417_c1	1.09845e-12	-1.59334	down
comp137442_c0	0	-2.33011	down
comp137443_c0	1.2526e-08	-1.27146	down
comp137462_c0	0.000184781	-1.09762	down
comp137469_c0	0	-1.86208	down
comp137477_c0	4.51431e-09	-1.44698	down
comp137490_c1	2.39331e-12	-1.66226	down
comp137515_c0	1.2458e-08	-1.2904	down
comp137553_c0	1.58375e-05	-1.12445	down
comp137553_c1	1.26473e-05	-1.13359	down
comp137572_c0	0.00796284	-1.02247	down
comp137575_c2	4.16373e-05	-1.31215	down
comp137642_c2	0.0039511	-1.01076	down
comp137643_c0	4.84693e-05	-1.36946	down
comp137664_c0	0	-4.49663	down
comp137677_c0	0	-2.9465	down
comp137688_c0	0	-1.79602	down
comp137721_c0	4.34397e-12	-2.37656	down
comp137744_c0	0.000103888	-1.20985	down
comp137747_c0	2.64233e-14	-1.97026	down
comp137799_c0	5.14033e-14	-1.78511	down
comp137806_c0	6.89208e-07	-1.23355	down
comp137813_c0	1.61757e-07	-1.95899	down
comp137857_c0	3.82842e-07	-1.88708	down
comp137887_c0	0.00180026	-1.17448	down
comp137894_c0	0	-2.69525	down
comp137894_c1	8.83849e-13	-3.23036	down
comp137904_c0	0.00109103	-2.87186	down
comp137921_c0	4.27229e-07	-1.36584	down
comp137949_c1	2.57705e-11	-1.41985	down
comp138001_c0	4.23284e-12	-1.46163	down
comp138022_c0	3.11418e-13	-1.52938	down
comp138027_c0	2.17048e-06	-1.65834	down
comp138060_c0	0	-4.84281	down
comp138161_c1	4.41869e-14	-1.59506	down
comp138180_c0	2.31493e-12	-1.50956	down
comp138187_c2	0.00505135	-1.35454	down
comp138208_c0	0	-1.85972	down
comp138233_c0	5.55112e-16	-1.80751	down
comp138233_c1	0	-2.58869	down
comp138236_c1	0.000575703	-1.0021	down
comp138259_c0	1.35383e-09	-1.32461	down
comp138264_c0	0	-3.38694	down
comp138267_c1	1.52486e-07	-1.31271	down
comp138271_c0	3.79564e-07	-1.17042	down
comp138337_c0	2.22256e-06	-1.1608	down
comp138342_c0	1.12215e-08	-1.27233	down
comp138346_c0	4.89198e-10	-1.34467	down
comp138382_c0	3.02869e-13	-1.86344	down
comp138412_c0	3.01379e-09	-1.83545	down
comp138437_c0	0.00511125	-3.35251	down
comp138437_c1	0.00608404	-1.06303	down
comp138490_c1	2.90658e-08	-1.24131	down
comp138492_c1	0.000108941	-1.23375	down
comp138498_c0	1.03199e-05	-1.0977	down
comp138516_c0	2.53429e-07	-1.20639	down
comp138529_c0	2.03774e-07	-1.18866	down
comp138576_c0	2.53103e-06	-1.85256	down
comp138589_c0	0	-1.92551	down
comp138616_c0	2.11264e-08	-1.58902	down
comp138643_c0	0	-3.34834	down
comp138659_c0	1.78935e-12	-1.56986	down
comp138677_c1	0.00458115	-1.09214	down
comp138700_c0	6.16388e-11	-1.50743	down
comp138715_c0	9.10887e-05	-1.05782	down
comp138717_c0	0	-3.27446	down
comp138752_c0	4.02234e-13	-1.53533	down
comp138770_c2	0.000652085	-1.27824	down
comp138836_c0	6.50559e-05	-1.00318	down
comp138852_c0	1.2347e-08	-1.30595	down
comp138861_c0	0.000135957	-1.21544	down
comp138884_c0	0.000367412	-1.14332	down
comp138885_c0	0	-2.82677	down
comp138932_c0	0.000326604	-1.23466	down
comp138948_c0	0	-1.85459	down
comp138951_c0	2.33218e-07	-1.17712	down
comp138971_c0	7.381e-07	-2.27255	down
comp138971_c1	0	-2.33223	down
comp138980_c0	7.81273e-07	-1.56346	down
comp138988_c0	0	-1.80187	down
comp139004_c0	0.00307862	-1.21481	down
comp139014_c0	5.26217e-06	-2.50462	down
comp139014_c3	0.00284698	-1.19121	down
comp139033_c0	1.51205e-06	-1.13882	down
comp139076_c0	0.000187264	-1.08679	down
comp139106_c0	2.9306e-06	-1.32531	down
comp139133_c1	3.13143e-09	-1.31112	down
comp139136_c2	0	-2.48059	down
comp139150_c0	0.00522293	-1.62848	down
comp139169_c0	0.00211838	-1.06619	down
comp139173_c0	0.00093098	-1.17119	down
comp139180_c0	2.46713e-07	-2.53453	down
comp139265_c0	2.56695e-07	-1.17836	down
comp139313_c0	8.4347e-12	-1.68544	down
comp139343_c1	3.62835e-11	-1.41146	down
comp139351_c0	5.39644e-06	-1.1095	down
comp139351_c1	7.35049e-07	-1.1507	down
comp139372_c0	0.000117232	-1.00829	down
comp139374_c0	0	-3.04758	down
comp139377_c1	2.94076e-08	-1.26411	down
comp139378_c0	5.53735e-12	-1.68842	down
comp139433_c1	0.000183536	-1.31613	down
comp139473_c1	1.16573e-14	-1.59727	down
comp139493_c0	3.9167e-05	-1.06167	down
comp139499_c0	0.000756204	-1.06728	down
comp139516_c1	0.000869106	-1.78696	down
comp139525_c0	0.000550984	-2.01845	down
comp139532_c2	6.62808e-10	-1.50764	down
comp139572_c2	0.000380007	-1.00903	down
comp139627_c1	0.00276328	-1.07319	down
comp139678_c2	0.000640046	-1.13269	down
comp139688_c1	0	-1.74528	down
comp139705_c0	1.13064e-11	-1.67729	down
comp139735_c0	0.00158964	-1.51616	down
comp139743_c0	1.46641e-05	-1.05373	down
comp139757_c0	1.99128e-09	-1.81881	down
comp139776_c1	3.68961e-09	-1.35628	down
comp139787_c0	0.00298059	-4.0957	down
comp139812_c0	1.60184e-07	-1.26606	down
comp139814_c0	0.000163808	-1.02957	down
comp139818_c0	2.41719e-06	-1.20823	down
comp139840_c0	3.26719e-10	-1.35499	down
comp139853_c0	5.43853e-05	-1.19854	down
comp139862_c0	1.49408e-05	-1.10271	down
comp139863_c0	0	-4.24028	down
comp139875_c0	7.79129e-06	-1.16297	down
comp139887_c1	6.53218e-05	-1.05157	down
comp139914_c0	2.06752e-05	-1.03941	down
comp139947_c0	5.35135e-06	-1.09368	down
comp140010_c0	1.11022e-16	-1.84827	down
comp140038_c0	0	-1.89192	down
comp140066_c0	3.89511e-07	-1.22131	down
comp140084_c0	2.11071e-06	-1.21298	down
comp140096_c2	9.88098e-15	-1.88335	down
comp140110_c0	2.81219e-06	-1.11227	down
comp140189_c0	2.16474e-07	-1.18378	down
comp140206_c0	1.17099e-06	-1.42847	down
comp140223_c0	6.77962e-09	-1.72927	down
comp140245_c0	1.7132e-07	-1.25351	down
comp140247_c0	0	-2.2532	down
comp140275_c0	0	-2.42069	down
comp140277_c0	1.9641e-12	-1.65233	down
comp140325_c0	8.22788e-07	-1.17603	down
comp140333_c0	0	-2.25399	down
comp140359_c0	3.4022e-10	-1.75997	down
comp140388_c0	3.88578e-14	-2.19035	down
comp140421_c2	0	-3.18648	down
comp140445_c0	1.69285e-06	-1.14356	down
comp140471_c0	0.000848646	-1.04966	down
comp140493_c0	7.67425e-07	-1.27567	down
comp140581_c0	2.25375e-14	-1.61038	down
comp140605_c0	0	-3.97856	down
comp140615_c1	0.000501428	-1.01963	down
comp140646_c0	5.143e-07	-1.89069	down
comp140646_c1	2.18478e-10	-1.78368	down
comp140664_c0	0.00017842	-1.36341	down
comp140666_c0	0.00513699	-1.43756	down
comp140669_c0	0	-2.63717	down
comp140701_c0	0.000624179	-1.12255	down
comp140703_c0	2.53657e-05	-1.04539	down
comp140772_c0	2.4617e-06	-1.14024	down
comp140809_c0	1.58207e-13	-1.57427	down
comp140813_c0	0	-2.68858	down
comp140905_c0	4.43135e-08	-1.42849	down
comp140949_c0	3.24677e-10	-3.44933	down
comp140960_c1	1.0861e-06	-1.21316	down
comp141057_c0	2.24967e-07	-1.35489	down
comp141065_c0	1.76525e-14	-1.95207	down
comp141085_c0	9.51759e-05	-1.08352	down
comp141093_c1	0	-2.1469	down
comp141124_c0	2.13163e-14	-1.68398	down
comp141128_c0	3.1049e-05	-1.05187	down
comp141143_c0	7.04392e-12	-1.48324	down
comp141170_c0	0	-1.80077	down
comp141176_c0	0.000411726	-1.03984	down
comp141186_c0	0.00131511	-1.19582	down
comp141249_c0	0	-1.95461	down
comp141257_c1	0	-1.97125	down
comp141274_c0	4.10478e-08	-1.7481	down
comp141280_c0	0.000404402	-1.75034	down
comp141280_c1	0.0027057	-1.2106	down
comp141317_c1	1.2168e-05	-1.05636	down
comp141323_c0	8.78993e-05	-1.0098	down
comp141373_c0	5.32438e-07	-2.21032	down
comp141373_c1	1.88156e-07	-2.48855	down
comp141381_c1	2.66275e-09	-1.32957	down
comp141397_c0	0.00896622	-1.01315	down
comp141424_c0	3.93033e-05	-1.14992	down
comp141425_c0	0	-2.66452	down
comp141447_c0	6.33551e-09	-1.37446	down
comp141458_c0	2.44249e-15	-1.65528	down
comp141467_c0	7.5906e-05	-1.32056	down
comp141533_c0	0.000469362	-1.29559	down
comp141536_c0	2.88899e-05	-1.10216	down
comp141577_c0	3.54643e-09	-1.29357	down
comp141581_c0	6.27355e-07	-1.14926	down
comp141581_c1	7.66838e-05	-1.57638	down
comp141644_c0	1.06213e-06	-1.2863	down
comp141665_c0	3.9959e-06	-1.13141	down
comp141705_c3	6.01791e-09	-1.28138	down
comp141734_c1	4.2466e-13	-1.60925	down
comp141743_c0	1.55219e-09	-1.32991	down
comp141756_c0	2.70026e-08	-1.23792	down
comp141845_c0	0	-2.61066	down
comp141976_c0	0.00575838	-1.10463	down
comp141986_c0	4.82665e-11	-1.57608	down
comp141987_c0	0	-2.09132	down
comp142029_c1	1.48316e-05	-1.04989	down
comp142062_c0	9.02124e-05	-1.02969	down
comp142074_c0	9.70373e-08	-1.43036	down
comp142085_c0	1.23165e-05	-1.07404	down
comp142099_c1	4.07589e-07	-1.17157	down
comp142116_c0	3.9968e-14	-1.58919	down
comp142125_c0	1.7597e-13	-1.53531	down
comp142126_c0	1.23025e-07	-1.19828	down
comp142145_c0	0.00255332	-1.03871	down
comp142148_c0	1.1059e-10	-1.38739	down
comp142195_c0	5.20384e-12	-1.85181	down
comp142234_c0	1.39322e-12	-1.56195	down
comp142264_c3	0.00661627	-2.15266	down
comp142285_c0	2.85014e-10	-1.43541	down
comp142288_c2	0.000909063	-2.23483	down
comp142345_c1	0	-2.26435	down
comp142371_c0	1.42051e-07	-1.37052	down
comp142398_c0	1.42372e-08	-1.25546	down
comp142430_c0	5.79264e-06	-1.27992	down
comp142492_c0	1.44126e-07	-1.19089	down
comp142495_c1	0.000132975	-1.03025	down
comp142558_c0	7.50511e-14	-1.61358	down
comp142625_c0	6.86429e-10	-1.39638	down
comp142647_c0	0.000538734	-1.00495	down
comp142662_c0	2.22045e-16	-2.72048	down
comp142662_c1	0	-2.34861	down
comp142748_c0	0	-2.27603	down
comp142766_c0	1.65292e-10	-1.55016	down
comp142821_c0	1.83409e-12	-1.50194	down
comp146644_c0	2.22045e-16	-2.05655	down
comp14716_c1	0.000934802	-3.1457	down
comp147655_c0	3.91072e-07	-4.16057	down
comp149376_c0	0.00541397	-1.72121	down
comp152445_c0	6.46929e-05	-1.54985	down
comp181144_c0	6.81974e-05	-1.83158	down
comp230844_c0	1.2178e-05	-3.23166	down
comp258383_c0	0	-5.16881	down
comp383672_c0	9.61365e-05	-2.08669	down
comp393759_c0	0.000332247	-2.62769	down
comp41282_c0	0.00389187	-3.00509	down
comp414815_c0	4.18347e-05	-2.24426	down
comp421553_c0	0.00171668	-4.15897	down
comp459599_c0	0.00013994	-3.31411	down
comp478345_c0	2.11683e-05	-3.4649	down
comp561861_c0	0.000990592	-4.21958	down
comp574584_c0	1.32296e-05	-3.50026	down
comp627389_c0	0.000147689	-3.70485	down
comp64156_c0	8.01242e-11	-3.24664	down
comp66596_c0	6.02629e-13	-2.69084	down
comp66947_c0	0.00223231	-1.61259	down
comp67427_c0	5.26217e-06	-2.50462	down
comp67514_c0	1.71572e-05	-1.23046	down
comp683311_c0	0.00298059	-4.0957	down
comp683490_c0	0.00511125	-3.35251	down
comp70106_c0	0.00663124	-1.74245	down
comp72799_c0	1.02217e-05	-3.0397	down
comp72802_c0	0.00171668	-4.15897	down
comp73325_c0	0.00115148	-2.67549	down
comp73994_c0	4.34323e-06	-3.09706	down
comp74436_c0	0.0043845	-1.81669	down
comp74779_c0	1.10142e-06	-2.04882	down
comp74826_c0	6.36977e-09	-1.91538	down
comp77629_c0	3.80164e-06	-2.32966	down
comp778238_c0	0.00111393	-3.51415	down
comp78423_c0	0.00307515	-3.40843	down
comp78912_c0	0.0024199	-3.0535	down
comp81126_c0	0.00049238	-2.47279	down
comp83426_c0	3.64286e-06	-1.3872	down
comp83426_c1	0.000122758	-1.45752	down
comp83518_c0	1.09851e-06	-1.42767	down
comp83540_c1	2.07118e-05	-1.66995	down
comp84346_c0	1.82972e-05	-1.36754	down
comp84870_c0	6.3822e-05	-2.7524	down
comp853091_c0	1.21517e-05	-3.91247	down
comp85453_c0	0.00171988	-2.49118	down
comp86411_c0	0	-3.37562	down
comp86560_c1	0.00491162	-1.05228	down
comp86789_c0	0.000695445	-2.91215	down
comp87237_c0	2.62965e-09	-2.28716	down
comp88029_c0	0.000503797	-1.68743	down
comp90293_c0	0.000934802	-3.1457	down
comp93366_c0	3.37659e-07	-3.25663	down
comp93836_c0	0.00625394	-2.95499	down
comp93923_c0	0.0084909	-3.29434	down
comp94586_c0	0.00129597	-1.72898	down
comp94838_c0	0.000134371	-2.8525	down
comp95462_c0	0.00233977	-1.16865	down
comp96039_c1	0.00640174	-1.64217	down
comp96919_c0	5.23885e-07	-1.40775	down
comp97288_c0	1.77581e-07	-2.77804	down
comp98969_c0	5.19188e-05	-1.84713	down
comp99997_c0	5.20912e-10	-2.01812	down

## Sheet: IME15 vs.IME6
#ID	FDR	log2FC	regulated
comp123825_c0	0	5.49352	up
comp122918_c0	0	5.446	up
comp81543_c0	6.23945e-14	4.99722	up
comp106539_c0	0	4.98811	up
comp129616_c0	0	4.92703	up
comp124996_c0	0	4.86069	up
comp115479_c0	3.44148e-07	4.8428	up
comp101657_c0	2.22045e-16	4.79131	up
comp64543_c0	9.39363e-07	4.76758	up
comp114316_c0	0	4.71599	up
comp126287_c0	0	4.70875	up
comp132166_c0	3.22736e-11	4.6992	up
comp121877_c0	2.59088e-06	4.68823	up
comp130390_c0	2.59088e-06	4.68823	up
comp119855_c1	4.31997e-06	4.64686	up
comp110748_c2	0	4.61937	up
comp125183_c0	0	4.59795	up
comp95547_c0	1.21078e-05	4.56037	up
comp102779_c0	3.43096e-05	4.46837	up
comp85704_c1	3.43096e-05	4.46837	up
comp120033_c0	0	4.46063	up
comp66835_c0	5.79974e-05	4.42007	up
comp107643_c2	9.97434e-09	4.37932	up
comp130096_c3	9.83169e-05	4.37009	up
comp110748_c0	2.47763e-08	4.32315	up
comp124124_c1	0.000167141	4.31833	up
comp829037_c0	0.000167141	4.31833	up
comp122921_c1	0	4.31434	up
comp135238_c0	0	4.31196	up
comp129181_c1	4.996e-14	4.28027	up
comp111233_c0	2.22045e-16	4.26474	up
comp142600_c1	0	4.22067	up
comp112461_c0	0.000487203	4.20886	up
comp116146_c0	0.000835351	4.15085	up
comp27321_c0	0.000835351	4.15085	up
comp506136_c0	0.000835351	4.15085	up
comp423462_c0	0.00143623	4.09041	up
comp118635_c0	1.01825e-06	4.07364	up
comp118252_c0	0	4.06796	up
comp120490_c0	0	4.0511	up
comp136400_c0	2.82977e-09	4.0436	up
comp474842_c0	0.00247574	4.02732	up
comp124683_c0	2.44249e-15	3.99826	up
comp133840_c0	0	3.98007	up
comp9308_c0	0.00427749	3.96135	up
comp133731_c0	0	3.94484	up
comp137664_c0	2.22045e-16	3.92765	up
comp123824_c1	2.42253e-08	3.91888	up
comp131042_c1	0	3.90192	up
comp134940_c1	0.0074036	3.89221	up
comp120524_c0	0	3.85822	up
comp101547_c0	1.79184e-05	3.85335	up
comp127490_c0	1.79184e-05	3.85335	up
comp120886_c0	5.168e-10	3.85163	up
comp131591_c1	7.72345e-10	3.83068	up
comp121137_c1	0	3.82443	up
comp122743_c0	1.50747e-11	3.80864	up
comp85128_c0	4.73198e-05	3.77176	up
comp119941_c1	8.88178e-16	3.76283	up
comp131150_c0	0	3.74941	up
comp132690_c0	5.2256e-07	3.72389	up
comp111895_c0	5.87446e-09	3.72112	up
comp98938_c0	0.000125888	3.68527	up
comp131303_c6	1.33499e-08	3.67486	up
comp79750_c0	0	3.67208	up
comp117886_c0	2.01648e-08	3.65116	up
comp122478_c2	0	3.64044	up
comp128062_c0	0.000205883	3.64	up
comp716115_c0	0.000205883	3.64	up
comp119372_c0	4.61886e-08	3.60255	up
comp118300_c0	3.12527e-06	3.59937	up
comp130929_c0	0	3.59335	up
comp127330_c0	0.000337289	3.59327	up
comp97999_c0	0.000337289	3.59327	up
comp119951_c0	4.90539e-06	3.56648	up
comp127054_c0	1.06348e-07	3.55226	up
comp119416_c1	0.000553479	3.54497	up
comp108140_c0	1.26188e-10	3.53743	up
comp116983_c0	1.26188e-10	3.53743	up
comp123549_c0	1.26188e-10	3.53743	up
comp134985_c2	0	3.50314	up
comp123786_c0	1.26801e-11	3.50249	up
comp105026_c0	0.000909648	3.49499	up
comp305908_c0	0.000909648	3.49499	up
comp116420_c0	2.04081e-12	3.46162	up
comp126933_c2	5.15137e-11	3.43933	up
comp128081_c0	3.01943e-05	3.42689	up
comp122451_c0	0	3.40019	up
comp113928_c0	0	3.40015	up
comp136166_c0	4.77198e-05	3.38977	up
comp74593_c0	0.00246693	3.38953	up
comp111804_c0	7.55133e-05	3.35168	up
comp109831_c0	3.00869e-11	3.34542	up
comp113009_c2	0.0040685	3.33376	up
comp140502_c0	0.0040685	3.33376	up
comp74522_c0	0.0040685	3.33376	up
comp103714_c0	0.00011964	3.31255	up
comp116796_c0	0.00011964	3.31255	up
comp126106_c0	4.82345e-06	3.30131	up
comp120419_c0	0	3.29468	up
comp115310_c0	0.00671234	3.27575	up
comp125113_c0	7.41254e-06	3.27053	up
comp86789_c0	7.41254e-06	3.27053	up
comp133624_c0	1.83197e-09	3.26814	up
comp114197_c0	2.63179e-09	3.24984	up
comp131119_c0	0	3.23769	up
comp137747_c0	0	3.23049	up
comp119966_c0	4.71949e-11	3.22407	up
comp123412_c0	8.46496e-07	3.21824	up
comp122548_c0	7.5297e-08	3.20394	up
comp168445_c0	7.5297e-08	3.20394	up
comp120325_c0	1.77791e-12	3.19501	up
comp64543_c1	0.00047899	3.18836	up
comp124721_c1	1.91056e-06	3.16516	up
comp127870_c2	0	3.1562	up
comp211628_c0	0.000762039	3.14447	up
comp123568_c0	4.17738e-05	3.14039	up
comp85925_c0	4.17738e-05	3.14039	up
comp115164_c0	2.68549e-09	3.134	up
comp124130_c1	2.68549e-09	3.134	up
comp132413_c4	5.08672e-11	3.13269	up
comp129214_c0	3.33067e-15	3.13068	up
comp133421_c0	1.60982e-14	3.07636	up
comp119855_c0	1.85234e-10	3.07518	up
comp122343_c0	6.57085e-12	3.07161	up
comp125719_c0	0	3.0687	up
comp126040_c0	0	3.06732	up
comp124130_c0	1.8846e-09	3.05299	up
comp89297_c0	0.000154274	3.03445	up
comp129238_c1	4.92029e-10	3.0305	up
comp124065_c0	1.48552e-05	3.02325	up
comp128017_c2	0.0030798	3.00416	up
comp99092_c0	9.34608e-12	2.99436	up
comp121686_c0	0	2.97494	up
comp110748_c1	0.000369956	2.95924	up
comp459166_c0	0.00490728	2.95419	up
comp122349_c2	1.46369e-08	2.95035	up
comp121325_c0	0	2.9352	up
comp125897_c0	1.33789e-07	2.92721	up
comp113370_c0	8.07515e-06	2.91135	up
comp121364_c0	8.07515e-06	2.91135	up
comp124912_c0	7.41045e-11	2.90792	up
comp121575_c0	0.00781444	2.90242	up
comp103649_c0	7.77134e-05	2.89873	up
comp124802_c0	7.77134e-05	2.89873	up
comp136368_c2	1.41839e-06	2.89709	up
comp131470_c0	2.39323e-09	2.88035	up
comp130668_c0	0.000889032	2.87989	up
comp128414_c0	4.3554e-13	2.87102	up
comp140523_c1	0	2.85536	up
comp118308_c0	3.01562e-06	2.84929	up
comp126354_c0	0.00137879	2.83851	up
comp119374_c1	4.4011e-06	2.82478	up
comp135007_c1	6.0476e-10	2.81598	up
comp102952_c0	2.34436e-10	2.80256	up
comp129803_c0	0	2.79858	up
comp131969_c0	0.000270434	2.79773	up
comp120928_c0	0.00213846	2.79592	up
comp84623_c0	0.00213846	2.79592	up
comp123159_c0	5.67421e-09	2.77216	up
comp138264_c0	0	2.77005	up
comp131303_c1	0	2.76444	up
comp97288_c0	4.70514e-07	2.76118	up
comp112672_c1	1.80966e-14	2.76014	up
comp132472_c1	5.55112e-16	2.75541	up
comp129605_c0	0	2.74847	up
comp128463_c0	8.68295e-05	2.73931	up
comp79942_c0	0.000622095	2.72625	up
comp135295_c0	5.24493e-10	2.71704	up
comp64963_c0	0.000129198	2.70853	up
comp75220_c0	0.000943715	2.68913	up
comp81756_c0	0.000943715	2.68913	up
comp140247_c0	0	2.68479	up
comp132977_c0	0	2.68418	up
comp130855_c0	0	2.68354	up
comp133603_c1	5.17217e-08	2.66219	up
comp120550_c0	0	2.65115	up
comp121606_c0	6.29168e-05	2.64049	up
comp125634_c2	1.06978e-06	2.63237	up
comp123696_c0	1.4894e-09	2.62511	up
comp125060_c0	9.21321e-05	2.61213	up
comp115941_c0	0.000426181	2.61204	up
comp79513_c0	0.000426181	2.61204	up
comp118429_c0	0.00217093	2.61191	up
comp123269_c0	2.11496e-06	2.59194	up
comp124912_c1	5.27138e-10	2.58964	up
comp111991_c0	0.00329062	2.57169	up
comp125006_c0	0.00329062	2.57169	up
comp176622_c0	4.51997e-05	2.56101	up
comp127870_c0	1.29792e-11	2.55164	up
comp132008_c0	1.29792e-11	2.55164	up
comp112845_c0	1.11022e-16	2.55014	up
comp125890_c1	0	2.53803	up
comp122531_c0	0.00498373	2.53031	up
comp124140_c0	0.00498373	2.53031	up
comp116298_c0	0.00140577	2.50863	up
comp126816_c0	0.00140577	2.50863	up
comp135491_c0	2.20002e-12	2.50258	up
comp127079_c0	3.23769e-05	2.4956	up
comp123046_c0	0.00042414	2.49276	up
comp113983_c0	0.00753854	2.48772	up
comp138541_c1	0.00753854	2.48772	up
comp154429_c0	0.00753854	2.48772	up
comp126944_c0	1.16913e-05	2.48561	up
comp130325_c0	0	2.48293	up
comp126349_c0	0	2.48258	up
comp144138_c0	0	2.4801	up
comp130980_c0	3.03003e-09	2.47752	up
comp126585_c0	4.41889e-06	2.47735	up
comp105738_c0	0.00209127	2.47244	up
comp122353_c0	9.94012e-08	2.46999	up
comp131241_c0	3.11469e-10	2.45297	up
comp140096_c2	0	2.44811	up
comp118297_c0	6.57992e-05	2.44616	up
comp120720_c0	0.00310901	2.43533	up
comp125051_c0	0.00310901	2.43533	up
comp124012_c0	0	2.42402	up
comp67199_c0	1.13687e-13	2.41449	up
comp133565_c0	4.57722e-06	2.41336	up
comp104388_c0	0	2.41197	up
comp127581_c0	0	2.40838	up
comp128081_c1	0.00461774	2.39723	up
comp114840_c0	0.00133144	2.39627	up
comp126291_c0	0.00133144	2.39627	up
comp115979_c0	0.000133752	2.39497	up
comp120628_c0	6.31877e-06	2.39383	up
comp125340_c0	4.35909e-07	2.39313	up
comp140256_c1	1.61471e-10	2.38303	up
comp119852_c0	4.79283e-13	2.37937	up
comp115524_c0	0	2.37879	up
comp126585_c2	8.50892e-11	2.36688	up
comp132918_c0	0.000591343	2.36602	up
comp142690_c1	0.000591343	2.36602	up
comp98919_c0	0.0068497	2.3581	up
comp116792_c1	3.17883e-10	2.35612	up
comp125890_c2	3.17883e-10	2.35612	up
comp126320_c0	0	2.35602	up
comp133735_c0	4.3848e-08	2.35453	up
comp120360_c1	7.7408e-11	2.3514	up
comp131153_c0	0.000271812	2.3419	up
comp139545_c0	0.000853311	2.33588	up
comp125634_c1	0.000387379	2.31461	up
comp120002_c0	2.29797e-05	2.31295	up
comp68523_c1	2.29797e-05	2.31295	up
comp142264_c3	0.00123078	2.3051	up
comp80687_c0	0.00123078	2.3051	up
comp126915_c0	0.00415862	2.29286	up
comp111464_c0	1.89367e-11	2.29117	up
comp119481_c0	4.86795e-07	2.26878	up
comp146975_c0	4.44089e-16	2.26866	up
comp222758_c0	0.00606573	2.25668	up
comp136004_c0	5.19478e-08	2.25622	up
comp114022_c0	3.73181e-11	2.2529	up
comp129824_c0	1.39726e-11	2.25056	up
comp89743_c1	1.39022e-07	2.23702	up
comp113227_c2	0.00111899	2.22951	up
comp139814_c0	0	2.22504	up
comp123591_c2	0.000507961	2.2198	up
comp102556_c0	0.00883254	2.21956	up
comp122360_c0	2.17012e-05	2.2136	up
comp127397_c0	0	2.21034	up
comp141373_c0	1.47327e-06	2.21011	up
comp116005_c0	0	2.20151	up
comp114595_c0	0.00159194	2.19999	up
comp128155_c1	3.02438e-07	2.19867	up
comp137424_c0	0	2.19719	up
comp120761_c0	1.53894e-08	2.19339	up
comp133377_c0	0.000714941	2.19302	up
comp128403_c0	8.31513e-06	2.18622	up
comp139680_c0	1.46815e-06	2.17716	up
comp128369_c2	0.00528559	2.17496	up
comp100929_c0	0.00226306	2.16985	up
comp125539_c0	0.00100575	2.16573	up
comp134974_c0	3.38474e-06	2.16449	up
comp96398_c1	0.000462833	2.16234	up
comp130597_c0	0.000219997	2.1595	up
comp128173_c1	3.95515e-07	2.15785	up
comp83124_c0	0	2.14029	up
comp132126_c0	0.00141398	2.13792	up
comp141373_c1	0.00014743	2.13551	up
comp136815_c0	1.10781e-06	2.1324	up
comp129920_c0	0	2.12936	up
comp119299_c0	0	2.12908	up
comp124667_c0	4.34527e-06	2.11789	up
comp128017_c0	4.34527e-06	2.11789	up
comp131756_c0	0.000896872	2.11115	up
comp140502_c1	0.000896872	2.11115	up
comp126879_c0	0.00198642	2.10956	up
comp77446_c0	0.00455953	2.10762	up
comp118633_c0	5.10492e-08	2.10112	up
comp132344_c1	3.55634e-05	2.09808	up
comp123449_c1	3.11879e-07	2.09693	up
comp122418_c0	0.000135623	2.09392	up
comp138733_c0	0	2.09187	up
comp135781_c1	0.000577284	2.08838	up
comp122285_c0	0.00124741	2.08486	up
comp130012_c0	0.0064589	2.07547	up
comp128808_c0	3.33257e-05	2.06518	up
comp134747_c0	3.33257e-05	2.06518	up
comp119593_c0	1.24821e-07	2.0603	up
comp122465_c0	1.05945e-06	2.05863	up
comp128901_c0	1.11022e-16	2.05553	up
comp127275_c1	0.000249408	2.05172	up
comp115433_c0	0.00390908	2.05111	up
comp108565_c0	0.00913328	2.04258	up
comp119359_c0	1.68753e-05	2.0402	up
comp117183_c0	6.84217e-06	2.0342	up
comp114254_c0	5.87481e-05	2.02972	up
comp115533_c0	8.34777e-13	2.02926	up
comp134344_c1	2.22045e-16	2.02663	up
comp64886_c0	0.000113514	2.02348	up
comp109618_c0	0	2.0211	up
comp99954_c0	1.4318e-08	2.02052	up
comp131318_c0	1.67889e-09	2.01953	up
comp133543_c0	4.38916e-09	2.01174	up
comp116937_c0	1.28688e-09	2.01125	up
comp66453_c0	6.52211e-06	2.01061	up
comp119467_c0	0.00333976	2.00297	up
comp119299_c1	8.27006e-08	1.99831	up
comp135115_c3	7.67698e-07	1.99196	up
comp94586_c0	3.80574e-05	1.99149	up
comp124693_c0	0.00765203	1.99019	up
comp130401_c0	0.00765203	1.99019	up
comp135394_c3	0.00765203	1.99019	up
comp139286_c0	6.20611e-06	1.98871	up
comp129324_c0	0	1.98765	up
comp116984_c0	0.000620195	1.986	up
comp138576_c0	5.99067e-07	1.98596	up
comp114051_c0	2.70102e-05	1.98282	up
comp129200_c0	4.6146e-06	1.98158	up
comp120950_c0	0.000406667	1.97479	up
comp119052_c0	9.42143e-05	1.96603	up
comp133624_c1	7.99361e-15	1.96519	up
comp117290_c0	0.000270355	1.96488	up
comp123796_c0	0.000270355	1.96488	up
comp124869_c0	0.000839381	1.96341	up
comp132017_c0	0.000839381	1.96341	up
comp120771_c0	7.53587e-06	1.95495	up
comp100433_c0	2.24682e-08	1.9451	up
comp115122_c0	0.000360782	1.94481	up
comp130899_c0	2.91319e-09	1.93851	up
comp115291_c0	2.33142e-05	1.93836	up
comp118066_c0	2.33142e-05	1.93836	up
comp131408_c2	0.00242895	1.92528	up
comp80945_c0	0.000112284	1.92389	up
comp138108_c0	9.05747e-06	1.92316	up
comp134055_c0	1.76811e-06	1.91541	up
comp149522_c0	1.01749e-08	1.91313	up
comp119252_c0	1.46519e-07	1.90811	up
comp132808_c0	6.34617e-06	1.90247	up
comp123700_c0	0.000101514	1.90163	up
comp117586_c1	0.00330404	1.89991	up
comp120536_c0	0.00330404	1.89991	up
comp133949_c0	0.00330404	1.89991	up
comp152445_c0	1.77635e-07	1.89952	up
comp121593_c0	2.56104e-10	1.89515	up
comp130870_c0	1.07844e-05	1.89315	up
comp130634_c1	2.66306e-07	1.89304	up
comp128091_c0	0.000192564	1.88886	up
comp136260_c0	1.37668e-14	1.88524	up
comp138201_c1	3.44523e-11	1.88173	up
comp133603_c0	0.00733218	1.87958	up
comp122822_c0	6.53271e-10	1.87544	up
comp125555_c0	2.44249e-15	1.8749	up
comp115940_c0	1.44329e-15	1.87485	up
comp129022_c0	0.00448912	1.87409	up
comp132500_c1	3.16626e-07	1.87342	up
comp113126_c0	0.00279595	1.86935	up
comp116716_c0	3.25821e-06	1.86841	up
comp130287_c1	1.72913e-05	1.86701	up
comp117066_c2	1.74361e-12	1.85684	up
comp124327_c1	1.56887e-09	1.85306	up
comp135509_c0	0.000329772	1.85295	up
comp127480_c0	2.45538e-07	1.85224	up
comp124409_c0	9.53916e-09	1.85078	up
comp134747_c3	0.000223971	1.85063	up
comp138224_c0	0.000223971	1.85063	up
comp136736_c2	6.64614e-06	1.84744	up
comp123401_c0	5.33971e-05	1.84324	up
comp133806_c0	0.000982628	1.83803	up
comp127786_c0	3.68996e-10	1.836	up
comp139483_c0	1.89695e-09	1.8322	up
comp139560_c0	8.12972e-12	1.82846	up
comp132635_c2	4.64543e-10	1.82797	up
comp141170_c0	1.15463e-14	1.82795	up
comp128429_c0	4.92606e-13	1.82534	up
comp127757_c0	1.15463e-14	1.82517	up
comp140333_c0	3.65975e-10	1.82314	up
comp123593_c0	5.48384e-12	1.82209	up
comp122470_c4	0.00507252	1.81992	up
comp88685_c0	0.00317075	1.81896	up
comp142596_c0	1.77525e-13	1.81564	up
comp133343_c3	1.74305e-14	1.81431	up
comp128778_c0	6.18271e-05	1.81357	up
comp134958_c0	5.87367e-09	1.81354	up
comp128775_c0	1.35003e-13	1.80962	up
comp139875_c0	1.1231e-12	1.80937	up
comp123543_c0	1.48048e-06	1.80144	up
comp114222_c0	7.85419e-05	1.79927	up
comp137826_c0	1.11508e-05	1.78931	up
comp66606_c0	3.80928e-11	1.78427	up
comp122260_c0	0.000294014	1.78203	up
comp124870_c0	0.000639774	1.7797	up
comp124935_c0	0.00565398	1.77116	up
comp125906_c0	0.000126652	1.77023	up
comp138932_c0	9.10496e-09	1.76929	up
comp116388_c0	0.00915003	1.76873	up
comp123155_c0	2.80953e-07	1.76662	up
comp101771_c0	2.29368e-05	1.76521	up
comp122112_c0	0.000557043	1.76351	up
comp129031_c0	0.000830682	1.76141	up
comp130643_c0	8.0994e-05	1.75922	up
comp131762_c1	0.00125486	1.75908	up
comp86035_c0	0.00125486	1.75908	up
comp120229_c0	0.00192155	1.7565	up
comp175503_c0	0.00298467	1.75361	up
comp129944_c0	1.4291e-06	1.75195	up
comp133007_c0	0.000486188	1.74862	up
comp129704_c0	3.53452e-05	1.74124	up
comp114300_c0	2.50466e-13	1.73967	up
comp137681_c5	0.000292975	1.73786	up
comp134745_c0	0.00251803	1.73585	up
comp126728_c0	0.000425391	1.73488	up
comp123581_c0	0.000624758	1.73162	up
comp134432_c1	4.18041e-06	1.72965	up
comp136723_c0	1.2613e-05	1.72941	up
comp138392_c0	2.03546e-09	1.72921	up
comp120405_c0	1.78202e-12	1.72869	up
comp126942_c0	1.95201e-06	1.72812	up
comp112762_c0	0.00622894	1.72703	up
comp103121_c0	1.34294e-08	1.72679	up
comp121275_c0	1.59193e-09	1.72583	up
comp133905_c0	7.59334e-07	1.72254	up
comp135088_c0	0.000115036	1.72075	up
comp125906_c1	1.77842e-09	1.71964	up
comp134747_c2	2.35952e-10	1.71963	up
comp134178_c4	5.8753e-13	1.71844	up
comp122255_c0	3.82628e-08	1.71806	up
comp137787_c2	8.03468e-13	1.71775	up
comp147898_c0	2.70913e-10	1.71645	up
comp79225_c0	0.00329653	1.7149	up
comp129910_c3	0.00517125	1.70946	up
comp121379_c0	0.00823315	1.70333	up
comp136273_c0	1.26432e-12	1.70166	up
comp130283_c0	9.29161e-05	1.70106	up
comp112567_c0	0.00102994	1.69701	up
comp132150_c1	0.00102994	1.69701	up
comp133367_c0	1.43552e-12	1.69674	up
comp125797_c0	7.34823e-10	1.69464	up
comp130288_c0	3.95417e-12	1.6932	up
comp172929_c0	5.04795e-06	1.69142	up
comp125896_c1	9.91325e-08	1.68874	up
comp117066_c1	2.45337e-09	1.67974	up
comp128561_c0	4.99789e-12	1.67494	up
comp114022_c1	0.00113419	1.66805	up
comp126037_c0	4.37558e-08	1.66748	up
comp122825_c0	0.00303359	1.6663	up
comp128224_c0	0.00303359	1.6663	up
comp126294_c0	0.000283446	1.66546	up
comp102551_c0	2.80235e-09	1.66455	up
comp133387_c0	0.000403664	1.66004	up
comp202346_c0	0.000403664	1.66004	up
comp114689_c0	1.82994e-10	1.65956	up
comp129235_c0	0.0046883	1.65868	up
comp102148_c0	3.05186e-11	1.65729	up
comp137721_c0	0.000250733	1.65685	up
comp138170_c0	2.51352e-09	1.65408	up
comp104521_c0	0.00392039	1.6465	up
comp121275_c3	2.88845e-07	1.64474	up
comp135103_c0	2.25093e-05	1.64413	up
comp125931_c0	0.00124099	1.64097	up
comp118711_c0	1.90619e-11	1.64026	up
comp121106_c0	3.84995e-08	1.63405	up
comp127445_c0	1.71807e-10	1.63282	up
comp125288_c0	1.37969e-05	1.63241	up
comp130949_c0	1.21874e-11	1.6324	up
comp134344_c3	1.343e-11	1.63097	up
comp129810_c0	1.5756e-06	1.63091	up
comp134516_c3	2.37204e-08	1.6304	up
comp126788_c0	4.18269e-06	1.62946	up
comp136895_c0	1.67355e-10	1.62601	up
comp131717_c1	3.02918e-06	1.62494	up
comp140085_c1	9.30839e-05	1.62037	up
comp133291_c1	2.27411e-11	1.61864	up
comp134911_c0	3.56017e-10	1.61451	up
comp140664_c0	4.38143e-06	1.61401	up
comp138079_c0	1.31631e-10	1.61345	up
comp127474_c2	6.2737e-05	1.59906	up
comp122817_c1	1.02826e-08	1.59476	up
comp134253_c1	5.91862e-11	1.59335	up
comp118466_c0	0.0014608	1.59172	up
comp131299_c0	6.07854e-11	1.59117	up
comp123591_c1	5.20802e-05	1.58982	up
comp130236_c1	9.50246e-08	1.58925	up
comp122066_c0	0.00453505	1.5879	up
comp132818_c3	0.00453505	1.5879	up
comp126098_c0	2.67947e-09	1.5871	up
comp138496_c0	8.18894e-10	1.58488	up
comp131041_c1	7.42825e-11	1.58172	up
comp132461_c0	7.08947e-09	1.57698	up
comp88685_c1	2.61574e-05	1.57524	up
comp132412_c0	3.35773e-10	1.57356	up
comp153046_c0	0.00320848	1.57256	up
comp142015_c0	4.21404e-08	1.56536	up
comp132279_c0	9.02092e-05	1.55973	up
comp124150_c0	0.00405994	1.55494	up
comp123431_c1	3.3846e-05	1.55436	up
comp137992_c0	3.48361e-08	1.5534	up
comp123020_c0	0.00011989	1.55322	up
comp131512_c0	3.38573e-09	1.55307	up
comp129339_c1	6.4518e-08	1.54789	up
comp120848_c0	0.00613801	1.5431	up
comp136502_c1	0.000129975	1.53932	up
comp129896_c4	0.000372218	1.53883	up
comp68039_c0	2.33068e-06	1.53876	up
comp134928_c4	0.00125064	1.53813	up
comp132034_c0	2.22963e-06	1.53693	up
comp67095_c0	9.88553e-09	1.53618	up
comp133979_c1	1.38841e-07	1.53536	up
comp124122_c0	7.43789e-09	1.53355	up
comp139162_c0	0.00938588	1.53009	up
comp140092_c1	0.000940086	1.52938	up
comp132748_c0	9.56817e-08	1.52851	up
comp141293_c0	9.31711e-08	1.52658	up
comp139465_c1	5.13441e-05	1.52533	up
comp134076_c0	2.53897e-07	1.52483	up
comp120889_c1	7.53632e-09	1.52462	up
comp130937_c0	6.24506e-10	1.52453	up
comp116878_c1	7.23908e-10	1.52286	up
comp119499_c0	0.000715729	1.52161	up
comp127420_c0	2.16222e-08	1.52123	up
comp134875_c4	4.3635e-08	1.52042	up
comp101513_c0	0.00648053	1.51903	up
comp125169_c0	0.00648053	1.51903	up
comp131650_c0	0.000627345	1.51804	up
comp133461_c2	0.00542241	1.51414	up
comp119810_c0	0.000486124	1.51145	up
comp139270_c0	0.00076524	1.50548	up
comp131621_c2	1.59995e-09	1.50195	up
comp120763_c1	3.39358e-05	1.50171	up
comp131497_c1	4.42032e-07	1.50091	up
comp129790_c0	1.33391e-06	1.49989	up
comp139030_c0	4.98962e-07	1.49796	up
comp118012_c0	0.00277415	1.49779	up
comp137243_c0	3.95648e-05	1.4939	up
comp131652_c0	6.56494e-07	1.49277	up
comp140781_c0	8.77463e-06	1.49039	up
comp133748_c0	3.99945e-09	1.48628	up
comp131899_c0	1.87911e-09	1.48515	up
comp135473_c2	8.878e-08	1.48025	up
comp97474_c0	3.37431e-05	1.47999	up
comp108824_c0	2.39722e-08	1.47678	up
comp141383_c1	9.06514e-06	1.47366	up
comp121752_c0	0.00120455	1.46506	up
comp114238_c0	1.23966e-05	1.46277	up
comp111564_c0	1.80633e-05	1.46035	up
comp137812_c1	0.000293207	1.45916	up
comp126828_c0	5.03235e-07	1.45613	up
comp131326_c0	7.9448e-06	1.45604	up
comp121878_c0	0.00195042	1.45594	up
comp131262_c0	5.48242e-09	1.45464	up
comp99037_c0	5.15952e-09	1.45462	up
comp130306_c1	1.18136e-05	1.45429	up
comp129958_c0	0.00168625	1.45412	up
comp127724_c0	6.00508e-09	1.4538	up
comp124018_c2	0.000174044	1.45258	up
comp126140_c0	7.16578e-05	1.45212	up
comp137974_c3	9.45205e-06	1.45128	up
comp111344_c0	6.44617e-09	1.45099	up
comp130104_c0	1.09561e-06	1.45013	up
comp116775_c0	0.00446175	1.44921	up
comp134922_c0	0.00446175	1.44921	up
comp139818_c0	9.60607e-08	1.44662	up
comp126690_c0	8.32174e-05	1.44432	up
comp133422_c2	1.41772e-08	1.43881	up
comp121757_c0	4.39025e-05	1.438	up
comp123058_c0	7.43151e-08	1.4363	up
comp109752_c0	0.00651739	1.43531	up
comp129001_c0	0.0046604	1.43246	up
comp111500_c1	5.44269e-05	1.43166	up
comp109349_c0	0.000437545	1.42827	up
comp134477_c0	2.07053e-08	1.42657	up
comp128137_c0	0.00186432	1.42575	up
comp136709_c0	0.000283124	1.42534	up
comp137045_c0	6.93897e-08	1.42447	up
comp134576_c0	0.00023059	1.42404	up
comp136466_c0	1.63086e-05	1.42292	up
comp129074_c0	0.000949919	1.42159	up
comp116176_c0	3.61936e-08	1.42067	up
comp130582_c0	1.5876e-08	1.4196	up
comp120116_c0	6.03119e-07	1.41782	up
comp126019_c2	3.98647e-07	1.41758	up
comp124990_c0	4.79408e-06	1.41552	up
comp128037_c0	0.00303208	1.41436	up
comp125136_c2	0.00169835	1.41192	up
comp136628_c0	3.62723e-08	1.41125	up
comp141372_c0	5.29816e-06	1.41118	up
comp123510_c0	2.74343e-08	1.41084	up
comp138816_c0	6.9728e-06	1.40746	up
comp116087_c0	0.000211942	1.40516	up
comp128978_c0	3.78172e-08	1.40504	up
comp138830_c0	1.0681e-07	1.40307	up
comp138400_c1	8.08345e-05	1.40277	up
comp124109_c0	6.40422e-05	1.40225	up
comp129459_c0	0.00430308	1.40117	up
comp135976_c1	2.22968e-06	1.39634	up
comp122065_c0	6.77764e-05	1.39546	up
comp132071_c0	5.84025e-05	1.39532	up
comp132870_c0	0.000178301	1.38857	up
comp140691_c0	0.00615474	1.38705	up
comp125395_c1	0.00726415	1.38695	up
comp134922_c1	0.000226001	1.38065	up
comp66981_c0	0.000273647	1.38032	up
comp107243_c0	0.000301906	1.38015	up
comp127718_c0	5.32699e-08	1.37973	up
comp130018_c1	0.000409949	1.3796	up
comp123307_c0	4.23907e-05	1.37754	up
comp113106_c0	0.00295209	1.3752	up
comp124304_c0	6.27747e-07	1.375	up
comp122623_c0	0.000237742	1.373	up
comp133341_c1	4.47005e-05	1.37199	up
comp142930_c0	7.50372e-08	1.37139	up
comp126248_c0	8.4065e-05	1.36981	up
comp131152_c0	0.000835592	1.36884	up
comp134895_c0	0.00354528	1.36275	up
comp134302_c0	0.00411463	1.36202	up
comp138737_c0	4.25553e-07	1.36091	up
comp145269_c0	9.9626e-08	1.35926	up
comp116188_c0	0.00912676	1.35772	up
comp123431_c0	5.951e-05	1.35515	up
comp135685_c0	3.11981e-07	1.35416	up
comp124103_c1	0.00019203	1.35353	up
comp117865_c0	0.00275706	1.35308	up
comp134432_c0	0.00102435	1.35007	up
comp130427_c0	5.07912e-07	1.34795	up
comp140925_c0	8.52922e-06	1.34648	up
comp134543_c0	0.00937256	1.34423	up
comp160648_c0	0.00328693	1.34134	up
comp127830_c0	0.00153383	1.33831	up
comp127888_c1	0.0051029	1.33752	up
comp136211_c0	3.92757e-07	1.3374	up
comp139435_c0	3.81969e-07	1.33624	up
comp120863_c0	0.00257758	1.33362	up
comp138236_c1	2.24343e-06	1.33281	up
comp142495_c1	9.86556e-07	1.33265	up
comp124310_c0	5.57812e-07	1.33254	up
comp104745_c0	0.00124873	1.33179	up
comp89170_c0	0.000737147	1.32934	up
comp124852_c1	4.58647e-06	1.32905	up
comp111353_c2	8.64359e-05	1.32848	up
comp117003_c1	1.30152e-05	1.32817	up
comp128275_c0	0.0020494	1.32682	up
comp130145_c0	0.00102782	1.32595	up
comp128093_c0	0.00611537	1.32474	up
comp115747_c0	0.000203703	1.32429	up
comp140825_c3	2.91602e-07	1.32427	up
comp119521_c0	1.23947e-06	1.32403	up
comp132036_c0	2.42404e-05	1.32389	up
comp135420_c0	0.00146104	1.32216	up
comp132747_c0	2.94551e-06	1.32146	up
comp142767_c0	3.33986e-07	1.31883	up
comp119628_c0	0.00212085	1.3179	up
comp135329_c0	3.08783e-05	1.31784	up
comp129673_c0	8.69834e-07	1.31773	up
comp133422_c0	1.91539e-06	1.31574	up
comp121159_c0	0.00627997	1.31385	up
comp140948_c2	0.000240935	1.31207	up
comp115419_c0	0.000607348	1.31161	up
comp141857_c1	0.0085672	1.30973	up
comp123629_c1	5.03527e-07	1.30909	up
comp140905_c0	1.82125e-05	1.30836	up
comp139200_c0	7.51009e-07	1.30765	up
comp128917_c0	8.65792e-06	1.30679	up
comp121757_c1	0.00156728	1.30604	up
comp126487_c2	0.00554886	1.30553	up
comp126931_c0	0.00199779	1.30271	up
comp132142_c0	1.67806e-05	1.30259	up
comp123058_c1	3.35635e-06	1.30257	up
comp125951_c0	3.42536e-06	1.3022	up
comp120566_c0	0.00182622	1.29661	up
comp135868_c0	8.50396e-07	1.29528	up
comp117066_c3	5.21532e-05	1.29526	up
comp124492_c1	0.000349963	1.2922	up
comp148461_c0	0.000231253	1.28965	up
comp139499_c0	3.85192e-05	1.28923	up
comp132582_c0	0.00343662	1.28673	up
comp137128_c1	1.87897e-05	1.28628	up
comp139433_c1	0.00102378	1.28599	up
comp141564_c0	3.60709e-05	1.28544	up
comp79433_c0	8.06351e-05	1.28522	up
comp128936_c1	0.00675139	1.28378	up
comp128119_c0	0.00596942	1.2772	up
comp140053_c0	7.46673e-05	1.27506	up
comp131416_c0	4.43595e-05	1.27473	up
comp134660_c0	0.00690126	1.27454	up
comp138575_c0	7.89705e-05	1.27403	up
comp113743_c0	0.000919954	1.27111	up
comp120181_c0	0.00029008	1.26967	up
comp127475_c0	1.50052e-06	1.26756	up
comp129281_c0	0.000138814	1.26638	up
comp117805_c0	0.00326891	1.26552	up
comp141191_c0	0.000324945	1.26373	up
comp135611_c1	0.00188994	1.26325	up
comp113866_c0	0.00816043	1.2627	up
comp130159_c0	7.22732e-06	1.25882	up
comp121884_c0	0.000514836	1.25879	up
comp141927_c0	2.96307e-05	1.25651	up
comp122185_c0	0.00268785	1.25627	up
comp128356_c0	1.98231e-05	1.25554	up
comp130064_c0	6.76018e-05	1.25533	up
comp124606_c0	0.00831444	1.254	up
comp140828_c0	2.89606e-06	1.2529	up
comp135552_c1	0.0024493	1.25209	up
comp136525_c0	2.3058e-06	1.25123	up
comp141408_c0	3.29182e-06	1.24917	up
comp137547_c2	0.000692483	1.24862	up
comp142428_c2	0.000254882	1.24805	up
comp138363_c0	6.3158e-06	1.24567	up
comp135464_c0	2.79103e-06	1.24442	up
comp134842_c1	1.09365e-05	1.24339	up
comp113158_c1	0.00282745	1.24312	up
comp134839_c0	8.5542e-06	1.24296	up
comp131456_c3	7.02502e-05	1.24062	up
comp125231_c0	0.0015647	1.24014	up
comp120934_c0	0.00577537	1.23971	up
comp129609_c0	2.14913e-05	1.23888	up
comp133105_c3	1.86274e-05	1.23861	up
comp130641_c2	6.73719e-06	1.23442	up
comp136585_c0	0.00995573	1.23408	up
comp129228_c0	3.8533e-05	1.23349	up
comp137247_c2	0.000106199	1.23294	up
comp129591_c0	0.00067625	1.22982	up
comp135013_c1	0.000606819	1.22542	up
comp140996_c0	6.4103e-06	1.22495	up
comp133701_c0	3.94998e-05	1.22451	up
comp139933_c0	1.75788e-05	1.22398	up
comp137663_c0	1.52856e-05	1.2231	up
comp132458_c0	0.00425258	1.22201	up
comp119747_c0	0.00112218	1.22158	up
comp137706_c1	1.60098e-05	1.22069	up
comp141806_c0	0.000200752	1.21968	up
comp117144_c0	5.90549e-06	1.21803	up
comp137515_c0	7.80631e-06	1.21785	up
comp131351_c0	0.000563649	1.21758	up
comp125978_c1	0.00020079	1.21541	up
comp128513_c0	2.12549e-05	1.21431	up
comp122117_c0	0.000247908	1.21221	up
comp124204_c0	6.52314e-05	1.21014	up
comp127687_c0	7.19895e-06	1.21007	up
comp138104_c1	8.16291e-06	1.20942	up
comp139155_c0	9.58833e-05	1.20883	up
comp120194_c0	0.00264923	1.2085	up
comp129808_c0	0.000920267	1.20519	up
comp142754_c0	0.000200895	1.20364	up
comp127599_c0	0.00928155	1.20134	up
comp141935_c1	0.000103425	1.19878	up
comp139527_c0	1.03017e-05	1.19712	up
comp134369_c2	0.00022438	1.19705	up
comp113665_c1	0.00164622	1.19663	up
comp142821_c0	1.15253e-05	1.19428	up
comp132820_c0	0.0034405	1.19241	up
comp139934_c1	1.3897e-05	1.19174	up
comp131575_c2	0.00108018	1.19147	up
comp83026_c1	0.00156895	1.19087	up
comp115047_c0	5.50792e-05	1.19057	up
comp133038_c0	2.3136e-05	1.18971	up
comp131950_c2	0.000103233	1.1894	up
comp108955_c0	2.83765e-05	1.18815	up
comp132459_c0	1.30358e-05	1.18805	up
comp133474_c0	1.45365e-05	1.18564	up
comp142101_c1	0.000345335	1.18324	up
comp137172_c0	0.00164094	1.18291	up
comp122472_c0	3.8088e-05	1.18288	up
comp136254_c0	2.41098e-05	1.18091	up
comp127029_c0	0.000540944	1.18029	up
comp137238_c2	4.1494e-05	1.17928	up
comp133560_c0	1.87101e-05	1.17734	up
comp138940_c2	3.12039e-05	1.17627	up
comp131758_c0	0.000593315	1.1755	up
comp131334_c0	0.00305344	1.17538	up
comp136057_c0	0.000567891	1.17469	up
comp109245_c1	0.000347613	1.17434	up
comp127119_c1	1.9315e-05	1.17342	up
comp134094_c0	2.90819e-05	1.17334	up
comp130385_c0	0.000165118	1.17334	up
comp132204_c0	0.000749671	1.17301	up
comp134581_c0	2.16931e-05	1.17268	up
comp140949_c1	2.06647e-05	1.17088	up
comp115551_c0	4.99805e-05	1.17074	up
comp135165_c0	2.58965e-05	1.1689	up
comp141806_c2	2.9691e-05	1.16874	up
comp130468_c2	0.000211437	1.16468	up
comp120889_c0	0.00793003	1.16278	up
comp126641_c0	0.00124638	1.16007	up
comp130824_c2	0.000712792	1.1599	up
comp134976_c0	0.000712792	1.1599	up
comp124127_c0	0.000182543	1.15989	up
comp137731_c1	0.00802645	1.15776	up
comp140238_c0	0.000779753	1.1552	up
comp142598_c0	0.00122662	1.15352	up
comp132690_c1	0.000142666	1.15225	up
comp128089_c1	0.00729132	1.15212	up
comp132795_c0	8.96432e-05	1.15053	up
comp130426_c1	0.000225695	1.14936	up
comp142585_c2	3.76256e-05	1.14931	up
comp134382_c0	0.00152307	1.14899	up
comp134625_c0	0.000507582	1.14877	up
comp134863_c0	0.000196549	1.1462	up
comp125472_c0	0.00137924	1.14532	up
comp131394_c0	0.00453597	1.14491	up
comp136186_c2	5.49492e-05	1.14259	up
comp124487_c0	8.71212e-05	1.14251	up
comp127278_c0	4.97577e-05	1.14141	up
comp142076_c0	5.2372e-05	1.13972	up
comp142085_c0	5.50314e-05	1.13967	up
comp130133_c2	0.00839509	1.13903	up
comp138934_c1	0.000861141	1.13784	up
comp137530_c1	0.000101148	1.13763	up
comp135890_c0	9.02292e-05	1.13308	up
comp135007_c3	0.000113524	1.13266	up
comp138391_c0	0.000167192	1.13255	up
comp142811_c1	0.000955583	1.13114	up
comp134941_c0	0.00111031	1.12448	up
comp137642_c2	0.00169331	1.12408	up
comp139378_c0	0.000796572	1.12282	up
comp134748_c0	9.98023e-05	1.12083	up
comp129826_c0	0.000708925	1.1194	up
comp132948_c0	0.00185768	1.11896	up
comp133563_c0	9.12187e-05	1.11778	up
comp136211_c2	0.000303814	1.11577	up
comp134796_c0	8.58383e-05	1.11539	up
comp117547_c0	0.00890225	1.1144	up
comp133551_c1	9.22468e-05	1.1136	up
comp138452_c0	0.000481283	1.11324	up
comp129660_c0	0.000248252	1.11186	up
comp126380_c0	0.000234002	1.11142	up
comp139208_c0	0.000317014	1.11106	up
comp141256_c0	0.00114494	1.11019	up
comp124561_c0	0.00210334	1.109	up
comp129536_c0	0.00380222	1.1084	up
comp135551_c0	0.000734138	1.10635	up
comp128129_c1	0.000230075	1.10191	up
comp135909_c1	0.00834528	1.10061	up
comp137799_c0	0.000924855	1.10005	up
comp134036_c0	0.0001549	1.09956	up
comp128003_c0	0.000387786	1.09942	up
comp125554_c0	0.00014447	1.09706	up
comp126135_c0	0.00240815	1.09705	up
comp130803_c0	0.000344827	1.09508	up
comp121812_c0	0.00548452	1.09483	up
comp140201_c0	0.000143947	1.09379	up
comp142219_c0	0.00786133	1.08866	up
comp125747_c0	0.0025479	1.08838	up
comp135489_c0	0.0048315	1.08821	up
comp135109_c1	0.00049822	1.08656	up
comp140875_c0	0.00220671	1.08625	up
comp136150_c0	0.000509229	1.08622	up
comp127664_c3	0.00104295	1.08507	up
comp136211_c1	0.00291591	1.0849	up
comp139572_c2	0.000557634	1.08481	up
comp126265_c0	0.00331138	1.0834	up
comp134214_c0	0.000697631	1.08316	up
comp138861_c0	0.00621298	1.08295	up
comp133066_c1	0.000509489	1.08157	up
comp131968_c4	0.00217923	1.08119	up
comp134555_c0	0.000233235	1.08013	up
comp132867_c0	0.000445704	1.07934	up
comp126668_c0	0.000468179	1.07779	up
comp129333_c0	0.000289501	1.07596	up
comp120936_c1	0.000450203	1.07568	up
comp110276_c1	0.000486722	1.07522	up
comp132796_c0	0.0097842	1.07468	up
comp126204_c0	0.00310746	1.07463	up
comp141065_c0	0.00595456	1.07373	up
comp131404_c0	0.000590637	1.06945	up
comp131685_c1	0.00277513	1.06791	up
comp136156_c0	0.00159766	1.06521	up
comp136348_c2	0.00248223	1.06379	up
comp139875_c1	0.00474601	1.0626	up
comp121863_c0	0.00145837	1.06153	up
comp135308_c0	0.000695249	1.06122	up
comp134987_c1	0.0016373	1.05927	up
comp126482_c0	0.00260534	1.05744	up
comp125844_c1	0.000657803	1.05523	up
comp127378_c0	0.00304966	1.05443	up
comp138001_c1	0.000383572	1.0535	up
comp126197_c0	0.00805481	1.05342	up
comp132160_c0	0.00213105	1.05291	up
comp82556_c0	0.00651256	1.05134	up
comp127521_c0	0.000425174	1.04906	up
comp127275_c0	0.000499295	1.04686	up
comp134526_c1	0.00548632	1.04586	up
comp129805_c0	0.00163135	1.04314	up
comp139823_c1	0.000512318	1.04222	up
comp136864_c0	0.000557336	1.04073	up
comp137462_c0	0.00322505	1.04059	up
comp138778_c0	0.00782171	1.04026	up
comp142315_c0	0.00252295	1.03785	up
comp137974_c2	0.000797108	1.03543	up
comp131303_c5	0.000899832	1.03525	up
comp126701_c0	0.000635395	1.03475	up
comp132473_c0	0.000706015	1.03461	up
comp130792_c2	0.00469596	1.0332	up
comp125987_c0	0.00406765	1.03287	up
comp132006_c0	0.00158319	1.02968	up
comp134226_c1	0.000896185	1.02918	up
comp136447_c0	0.00573449	1.0258	up
comp133551_c0	0.00202244	1.02388	up
comp137939_c0	0.000939446	1.02383	up
comp127384_c0	0.00830667	1.02379	up
comp113264_c0	0.000863628	1.0232	up
comp135331_c0	0.00587157	1.02139	up
comp138321_c0	0.000827406	1.02028	up
comp134010_c0	0.0010948	1.01861	up
comp137617_c0	0.00749898	1.01769	up
comp136045_c0	0.00110561	1.01459	up
comp130317_c0	0.00104194	1.01439	up
comp142214_c0	0.00123453	1.01342	up
comp113317_c0	0.00152511	1.01309	up
comp134344_c2	0.00148251	1.01291	up
comp124626_c0	0.00118346	1.00981	up
comp141366_c0	0.00125962	1.00687	up
comp128667_c0	0.00312791	1.00558	up
comp137425_c0	0.00231218	1.00445	up
comp137981_c0	0.00459161	1.00422	up
comp142776_c1	0.00588573	1.00388	up
comp122628_c0	0.00269452	1.00248	up
comp142047_c0	0.00323615	1.00221	up
comp141782_c0	0.00147085	-1.00212	down
comp141378_c0	0.00177295	-1.00277	down
comp140747_c0	0.000911169	-1.00284	down
comp135096_c0	0.00741064	-1.00363	down
comp135620_c0	0.000963185	-1.00443	down
comp130429_c1	0.0028591	-1.00497	down
comp150381_c0	0.00425208	-1.00892	down
comp137396_c0	0.00883786	-1.00989	down
comp135427_c0	0.00910747	-1.01162	down
comp126846_c0	0.000784563	-1.01443	down
comp125769_c0	0.00346254	-1.02265	down
comp130839_c0	0.000771929	-1.02331	down
comp135574_c0	0.000588699	-1.02359	down
comp136401_c0	0.0005445	-1.0239	down
comp131074_c0	0.0018865	-1.0296	down
comp129970_c0	0.000723691	-1.03011	down
comp128780_c0	0.000918301	-1.03142	down
comp132116_c1	0.00105104	-1.03279	down
comp137682_c1	0.000416986	-1.03535	down
comp139883_c2	0.000506501	-1.03545	down
comp129163_c0	0.00496757	-1.03879	down
comp133676_c2	0.000399499	-1.03986	down
comp138109_c0	0.000487008	-1.03997	down
comp135947_c1	0.00092685	-1.04027	down
comp134795_c0	0.000482583	-1.0403	down
comp128090_c0	0.00216933	-1.04067	down
comp138164_c1	0.000358315	-1.04183	down
comp131065_c1	0.00241164	-1.04324	down
comp139078_c0	0.000986267	-1.04582	down
comp156295_c0	0.00207489	-1.04758	down
comp141458_c0	0.000468753	-1.04814	down
comp135594_c0	0.00321408	-1.04854	down
comp137894_c0	0.00202313	-1.05028	down
comp139991_c0	0.00148266	-1.05176	down
comp129577_c0	0.000345292	-1.05296	down
comp135908_c0	0.002541	-1.0575	down
comp125698_c0	0.00409818	-1.05921	down
comp138597_c0	0.000229058	-1.05965	down
comp128284_c0	0.00938136	-1.06132	down
comp121607_c0	0.000225926	-1.06199	down
comp125743_c0	0.000302032	-1.06205	down
comp136824_c0	0.000534623	-1.06352	down
comp136064_c1	0.000622943	-1.0653	down
comp126866_c1	0.000245691	-1.06583	down
comp119770_c0	0.000929273	-1.06798	down
comp131023_c2	0.000185111	-1.06828	down
comp136331_c0	0.000231374	-1.07133	down
comp141889_c0	0.00586684	-1.07287	down
comp136136_c0	0.00282298	-1.07503	down
comp134853_c0	0.00532002	-1.07518	down
comp122352_c0	0.000310547	-1.07626	down
comp135122_c0	0.00602962	-1.0767	down
comp141145_c2	0.00208091	-1.07904	down
comp125769_c1	0.00233541	-1.07946	down
comp124942_c0	0.000141657	-1.08022	down
comp134258_c0	0.00020768	-1.08032	down
comp126679_c0	0.000829472	-1.08982	down
comp133490_c0	0.00591644	-1.09175	down
comp138164_c0	0.00046817	-1.09175	down
comp127120_c0	0.000119606	-1.09189	down
comp139085_c0	0.000119414	-1.09296	down
comp129396_c0	0.000111158	-1.10115	down
comp142737_c1	0.000106448	-1.1027	down
comp114634_c0	6.94591e-05	-1.10711	down
comp121618_c1	0.00432975	-1.10832	down
comp141827_c0	0.000674931	-1.10859	down
comp134964_c0	0.00230938	-1.10966	down
comp135339_c2	7.18019e-05	-1.11006	down
comp140479_c1	6.42978e-05	-1.11236	down
comp132606_c0	0.00940277	-1.11378	down
comp131170_c0	0.00161389	-1.11583	down
comp140574_c1	0.000619816	-1.11839	down
comp112046_c0	0.000148779	-1.11891	down
comp141145_c1	0.000169096	-1.12172	down
comp140479_c0	5.03742e-05	-1.12367	down
comp130242_c0	0.0021953	-1.12771	down
comp139750_c0	3.90484e-05	-1.13119	down
comp131393_c0	4.16934e-05	-1.13522	down
comp141247_c2	0.0054713	-1.13617	down
comp129201_c0	0.00193444	-1.13663	down
comp130734_c1	5.35029e-05	-1.13683	down
comp132805_c0	4.47434e-05	-1.13811	down
comp131103_c0	2.97116e-05	-1.13887	down
comp125450_c0	0.00819791	-1.13908	down
comp134512_c0	3.45182e-05	-1.14013	down
comp84177_c0	0.000340578	-1.14241	down
comp136593_c0	0.000437893	-1.14243	down
comp99812_c0	4.55958e-05	-1.14386	down
comp125129_c0	2.7947e-05	-1.14689	down
comp141644_c0	0.00398605	-1.14703	down
comp138351_c0	0.00109838	-1.14833	down
comp136708_c0	2.23304e-05	-1.1492	down
comp129756_c0	9.82872e-05	-1.15127	down
comp137688_c0	0.000200888	-1.15183	down
comp141317_c1	2.55021e-05	-1.15214	down
comp123005_c0	0.00118087	-1.15278	down
comp85549_c1	0.000576067	-1.15478	down
comp118735_c1	0.00239829	-1.15872	down
comp133654_c0	3.10939e-05	-1.15933	down
comp131657_c0	4.55623e-05	-1.15978	down
comp130846_c0	2.49189e-05	-1.16021	down
comp123788_c1	0.000142728	-1.16107	down
comp136839_c1	0.000399584	-1.16226	down
comp123206_c1	7.62335e-05	-1.16382	down
comp137103_c0	1.82311e-05	-1.16541	down
comp121360_c1	0.00254751	-1.16543	down
comp129969_c1	0.0086354	-1.1663	down
comp131779_c0	2.10808e-05	-1.16639	down
comp136786_c1	0.00157626	-1.16842	down
comp118714_c0	2.89026e-05	-1.17236	down
comp126299_c0	0.000734985	-1.1727	down
comp111575_c0	1.36033e-05	-1.17312	down
comp122573_c0	0.000577513	-1.17395	down
comp131947_c0	3.81474e-05	-1.17438	down
comp126560_c0	1.15185e-05	-1.17488	down
comp135132_c0	0.000448092	-1.17521	down
comp142285_c0	0.00017178	-1.17957	down
comp83840_c0	0.0038571	-1.17979	down
comp129523_c0	3.27398e-05	-1.18167	down
comp125822_c0	0.00200927	-1.18184	down
comp127210_c0	2.81039e-05	-1.18257	down
comp134084_c0	8.91909e-06	-1.18346	down
comp131040_c0	0.000771625	-1.18443	down
comp137553_c0	0.000404584	-1.18595	down
comp141401_c0	1.03475e-05	-1.18809	down
comp142074_c0	0.00756056	-1.18834	down
comp133741_c0	0.00575238	-1.18872	down
comp135210_c1	2.48951e-05	-1.18938	down
comp122137_c0	0.00277859	-1.18963	down
comp136986_c1	0.000145211	-1.1967	down
comp139730_c0	0.0011393	-1.19817	down
comp132599_c0	0.0020284	-1.19868	down
comp95107_c0	0.00334548	-1.19918	down
comp103131_c0	0.00401308	-1.19938	down
comp131393_c2	7.28891e-06	-1.19969	down
comp134615_c0	0.0090918	-1.20036	down
comp135649_c0	9.34308e-05	-1.20053	down
comp131926_c0	4.75476e-06	-1.20527	down
comp131228_c0	4.55143e-06	-1.20661	down
comp141579_c0	4.70261e-06	-1.20667	down
comp132363_c1	0.00497626	-1.21112	down
comp129756_c1	0.000142832	-1.21147	down
comp137022_c0	3.71818e-06	-1.21373	down
comp126793_c1	0.000937959	-1.21391	down
comp136855_c0	6.06797e-06	-1.21623	down
comp153794_c0	0.000162363	-1.21786	down
comp130513_c0	3.93555e-06	-1.22129	down
comp137776_c0	3.20057e-06	-1.22178	down
comp129119_c0	0.000576206	-1.22762	down
comp123132_c0	0.00070492	-1.22941	down
comp137442_c0	8.2896e-06	-1.23706	down
comp131255_c1	0.000318133	-1.23818	down
comp130415_c0	0.00561135	-1.2382	down
comp121621_c0	3.72709e-06	-1.23847	down
comp128038_c0	1.82458e-05	-1.2408	down
comp123961_c2	2.58074e-05	-1.2435	down
comp115214_c0	1.58091e-06	-1.24555	down
comp123961_c1	6.59212e-06	-1.24625	down
comp121247_c0	5.30683e-05	-1.24655	down
comp129749_c0	0.000353695	-1.24831	down
comp137018_c0	2.56486e-05	-1.24898	down
comp121728_c0	3.62784e-06	-1.24945	down
comp130243_c0	0.000169578	-1.2536	down
comp141536_c0	0.000118471	-1.25501	down
comp138676_c0	0.000190191	-1.25571	down
comp125013_c0	0.00112937	-1.25594	down
comp132431_c0	0.00721383	-1.25708	down
comp125852_c1	0.000145585	-1.25913	down
comp138960_c0	1.19645e-05	-1.26099	down
comp140245_c0	4.18673e-05	-1.26152	down
comp142457_c0	1.48591e-06	-1.26259	down
comp130894_c1	0.000871293	-1.26341	down
comp125045_c0	2.4123e-06	-1.26635	down
comp127252_c0	2.03478e-05	-1.26782	down
comp117782_c0	0.00509674	-1.2679	down
comp128779_c0	2.17908e-05	-1.27032	down
comp135161_c0	5.94769e-06	-1.27167	down
comp113020_c0	0.000776999	-1.27339	down
comp131381_c0	7.13359e-07	-1.27494	down
comp135660_c0	5.08464e-06	-1.27555	down
comp140493_c0	0.000331316	-1.27757	down
comp135194_c2	4.30767e-06	-1.27772	down
comp133578_c0	4.35347e-05	-1.27857	down
comp127255_c0	0.000224533	-1.27879	down
comp139128_c0	0.00874333	-1.27887	down
comp141247_c1	0.00949651	-1.28072	down
comp138642_c0	0.00449441	-1.28256	down
comp137971_c0	7.6082e-05	-1.28819	down
comp127722_c0	6.66026e-07	-1.28855	down
comp124819_c0	0.0029994	-1.29032	down
comp125246_c0	6.13525e-06	-1.29228	down
comp126519_c0	0.00113684	-1.2969	down
comp127736_c0	3.49454e-07	-1.29928	down
comp132000_c0	0.000219651	-1.30167	down
comp133375_c0	3.04169e-07	-1.30181	down
comp127175_c0	5.80901e-07	-1.30365	down
comp123078_c0	0.00491482	-1.30393	down
comp134101_c2	0.00263411	-1.30463	down
comp105335_c1	0.00150163	-1.30519	down
comp136777_c1	3.17554e-07	-1.30904	down
comp128968_c0	3.96654e-07	-1.30939	down
comp135639_c2	2.08585e-06	-1.31073	down
comp133753_c0	0.00111493	-1.31259	down
comp136950_c0	0.00111493	-1.31259	down
comp131357_c0	2.10184e-07	-1.31291	down
comp141556_c0	0.000343112	-1.318	down
comp132003_c0	4.73949e-07	-1.31809	down
comp125428_c0	1.60205e-07	-1.31897	down
comp133641_c1	0.00789246	-1.31911	down
comp139089_c0	0.000835772	-1.31949	down
comp128822_c0	4.52668e-06	-1.32286	down
comp135973_c0	3.58903e-05	-1.32293	down
comp129715_c0	5.8466e-07	-1.32823	down
comp124532_c0	0.00582773	-1.33186	down
comp137179_c0	0.00188631	-1.33192	down
comp127604_c1	5.63958e-07	-1.33252	down
comp129279_c0	8.41133e-07	-1.334	down
comp124029_c0	2.44246e-07	-1.33555	down
comp127741_c1	2.23713e-07	-1.33751	down
comp133129_c0	0.000194797	-1.34045	down
comp113218_c0	7.64306e-08	-1.3427	down
comp132385_c0	5.86306e-06	-1.34308	down
comp130993_c0	0.00154251	-1.34439	down
comp107846_c0	0.00466716	-1.34726	down
comp141143_c0	6.27997e-07	-1.34918	down
comp128409_c0	0.000484078	-1.35047	down
comp146497_c0	1.43579e-06	-1.35312	down
comp103755_c0	0.000190307	-1.3568	down
comp125803_c0	1.33309e-07	-1.35759	down
comp138740_c0	5.02133e-05	-1.36015	down
comp132335_c0	0.00641647	-1.36227	down
comp134166_c0	6.00312e-08	-1.3626	down
comp135091_c1	5.07831e-06	-1.36285	down
comp134239_c0	0.000160784	-1.36556	down
comp124243_c0	0.00241916	-1.36616	down
comp142116_c0	1.571e-07	-1.36651	down
comp140098_c0	3.20042e-06	-1.37139	down
comp134686_c0	1.3237e-07	-1.37307	down
comp134814_c0	4.68127e-06	-1.37318	down
comp114023_c0	2.66199e-07	-1.37513	down
comp124442_c2	1.08645e-06	-1.37874	down
comp126883_c1	3.44716e-08	-1.38516	down
comp132003_c1	2.74073e-05	-1.3858	down
comp124462_c0	5.23991e-08	-1.38719	down
comp135626_c1	3.389e-06	-1.39092	down
comp131296_c0	0.000459715	-1.3912	down
comp136928_c0	5.74253e-08	-1.39223	down
comp138497_c0	2.29245e-08	-1.39228	down
comp137553_c1	9.41444e-06	-1.39255	down
comp140051_c0	4.43186e-08	-1.39283	down
comp119800_c0	9.97713e-05	-1.39406	down
comp123595_c0	2.12731e-06	-1.39691	down
comp140084_c0	1.66499e-05	-1.39786	down
comp111855_c1	0.00706183	-1.3989	down
comp135633_c0	0.000761796	-1.40056	down
comp140838_c0	0.00118239	-1.40362	down
comp119129_c1	0.00468977	-1.40563	down
comp66976_c0	6.70789e-05	-1.4059	down
comp135871_c0	0.00294345	-1.4065	down
comp139678_c2	0.00189856	-1.40725	down
comp129568_c0	0.00125566	-1.4079	down
comp129181_c0	9.51237e-09	-1.41082	down
comp141080_c1	7.72187e-09	-1.41301	down
comp134854_c0	7.79369e-09	-1.4131	down
comp147274_c0	9.02684e-06	-1.415	down
comp132138_c0	6.50778e-06	-1.41511	down
comp125901_c0	4.64977e-07	-1.4182	down
comp108081_c0	7.78283e-06	-1.41905	down
comp134349_c0	0.000100714	-1.42013	down
comp119661_c0	1.49912e-07	-1.42065	down
comp132281_c0	1.00142e-06	-1.42406	down
comp132679_c0	0.000501407	-1.42518	down
comp134609_c0	4.80039e-09	-1.42759	down
comp120048_c0	1.2264e-08	-1.42997	down
comp126940_c0	4.30696e-07	-1.43449	down
comp135591_c1	0.00709855	-1.43658	down
comp123240_c1	1.15826e-07	-1.43682	down
comp126883_c2	1.51652e-07	-1.43717	down
comp119343_c0	0.00183836	-1.4378	down
comp139693_c0	1.34995e-06	-1.4429	down
comp133760_c1	3.25683e-09	-1.44482	down
comp130120_c3	0.00310216	-1.44585	down
comp127084_c0	0.000647249	-1.44847	down
comp129751_c0	0.000647249	-1.44847	down
comp209896_c0	0.000647249	-1.44847	down
comp106300_c0	2.36072e-09	-1.45001	down
comp142148_c0	6.56845e-09	-1.45062	down
comp135581_c0	1.21036e-08	-1.45168	down
comp136036_c1	2.25878e-09	-1.45558	down
comp132701_c0	8.21642e-09	-1.46298	down
comp101233_c0	0.000377491	-1.4641	down
comp134691_c0	1.36955e-08	-1.46696	down
comp129320_c0	0.00389636	-1.46706	down
comp127222_c0	2.61575e-05	-1.46881	down
comp131310_c0	7.94526e-06	-1.4698	down
comp137127_c0	0.000156225	-1.4701	down
comp131752_c0	0.000290499	-1.47137	down
comp133061_c0	0.0064776	-1.47207	down
comp128047_c0	1.07704e-08	-1.47341	down
comp120303_c0	1.0995e-07	-1.47529	down
comp132660_c0	1.51919e-07	-1.47906	down
comp112835_c0	0.007061	-1.48094	down
comp126381_c1	0.00090099	-1.48351	down
comp134208_c0	5.8274e-05	-1.48483	down
comp135886_c0	6.56819e-10	-1.48588	down
comp141705_c2	3.02865e-06	-1.48672	down
comp136982_c0	7.09948e-09	-1.48838	down
comp134380_c1	6.06669e-10	-1.49365	down
comp127209_c0	8.83834e-09	-1.49466	down
comp120073_c0	3.91671e-10	-1.50086	down
comp133095_c0	2.60104e-07	-1.5021	down
comp136384_c0	4.79422e-07	-1.50298	down
comp138437_c1	0.00231709	-1.50349	down
comp128201_c0	6.03654e-06	-1.50378	down
comp135249_c0	6.06051e-09	-1.50653	down
comp119731_c0	1.07043e-05	-1.5066	down
comp135734_c0	3.74655e-09	-1.50857	down
comp132826_c0	1.10223e-06	-1.50942	down
comp69616_c0	5.61639e-08	-1.51395	down
comp120667_c0	6.82542e-08	-1.51572	down
comp121385_c0	3.27034e-07	-1.51792	down
comp132994_c0	3.48613e-10	-1.51965	down
comp122890_c0	0.00267173	-1.52168	down
comp128492_c1	0.00635207	-1.52246	down
comp132107_c0	7.3891e-08	-1.53428	down
comp140031_c0	0.00032932	-1.53461	down
comp127696_c0	8.87171e-09	-1.5389	down
comp132581_c0	1.48832e-10	-1.53961	down
comp135261_c0	0.00204015	-1.54049	down
comp126873_c0	9.44756e-11	-1.54077	down
comp131542_c0	1.62916e-06	-1.54244	down
comp116720_c1	3.29918e-07	-1.54247	down
comp128723_c0	1.72763e-07	-1.54248	down
comp122872_c0	1.56157e-10	-1.54421	down
comp140709_c0	1.8984e-06	-1.54692	down
comp129007_c0	1.466e-05	-1.5475	down
comp137191_c0	1.466e-05	-1.5475	down
comp135118_c0	3.54941e-10	-1.54775	down
comp132082_c0	1.83242e-05	-1.54855	down
comp123063_c0	1.43921e-08	-1.54911	down
comp128286_c6	6.53068e-08	-1.55031	down
comp133342_c0	6.68333e-11	-1.55056	down
comp121618_c0	0.00218451	-1.55093	down
comp133448_c0	0.000107653	-1.55138	down
comp125000_c0	2.00847e-08	-1.55153	down
comp138956_c0	7.37909e-11	-1.55214	down
comp134832_c0	7.04633e-11	-1.55642	down
comp141257_c1	4.37647e-10	-1.55941	down
comp124042_c0	0.00111713	-1.56664	down
comp127604_c0	4.08915e-08	-1.56738	down
comp114260_c0	1.37056e-10	-1.56968	down
comp139737_c0	9.24947e-11	-1.57059	down
comp137532_c0	1.29119e-09	-1.57232	down
comp117614_c0	0.00387383	-1.57823	down
comp126551_c0	2.61001e-06	-1.57981	down
comp132853_c0	0.00058915	-1.58033	down
comp123672_c0	5.2583e-10	-1.58076	down
comp129303_c0	2.08093e-10	-1.58264	down
comp135905_c0	2.76991e-07	-1.58532	down
comp127564_c0	0.0012584	-1.58879	down
comp133569_c1	2.60248e-10	-1.58958	down
comp116730_c0	0.00418225	-1.59198	down
comp106889_c0	0.00188882	-1.59393	down
comp134128_c0	1.53173e-06	-1.59843	down
comp123173_c0	1.42578e-11	-1.60342	down
comp135365_c0	1.66198e-11	-1.60425	down
comp141668_c0	5.6144e-11	-1.60563	down
comp128369_c3	2.03581e-09	-1.60629	down
comp129847_c0	1.3443e-11	-1.61109	down
comp133901_c0	1.15911e-11	-1.61142	down
comp123552_c1	0.00310475	-1.61428	down
comp236176_c0	0.00310475	-1.61428	down
comp133689_c0	2.77083e-11	-1.61482	down
comp104777_c0	1.34137e-11	-1.6172	down
comp130027_c0	0.00215406	-1.62117	down
comp129863_c0	2.75069e-05	-1.62401	down
comp125222_c0	6.91238e-06	-1.62856	down
comp137167_c0	0.00333561	-1.62977	down
comp103209_c0	4.55486e-06	-1.6343	down
comp137068_c1	4.61288e-07	-1.63557	down
comp135456_c2	1.23648e-11	-1.63637	down
comp122363_c0	4.07824e-11	-1.6369	down
comp130821_c0	0.00358438	-1.64647	down
comp133703_c0	4.88829e-05	-1.6531	down
comp134106_c0	1.05928e-10	-1.65619	down
comp131294_c1	0.00170318	-1.65787	down
comp132543_c0	1.03118e-12	-1.66041	down
comp124476_c0	1.10106e-10	-1.66345	down
comp137033_c0	6.44715e-11	-1.66534	down
comp128371_c0	6.66608e-05	-1.67095	down
comp118332_c0	0.00930827	-1.67326	down
comp139878_c0	2.16344e-11	-1.67644	down
comp116318_c0	4.18288e-11	-1.67701	down
comp131080_c0	1.40088e-05	-1.6772	down
comp126051_c0	0.00022731	-1.68275	down
comp123937_c1	5.48503e-07	-1.68468	down
comp142299_c0	5.56262e-06	-1.68613	down
comp119436_c0	2.55427e-08	-1.69029	down
comp109603_c1	9.24012e-05	-1.69173	down
comp138621_c0	9.24012e-05	-1.69173	down
comp138998_c0	0.000234961	-1.69678	down
comp133861_c1	0.000172152	-1.69958	down
comp130878_c0	8.76521e-13	-1.70087	down
comp165571_c0	2.11131e-08	-1.70091	down
comp137191_c1	0.00667198	-1.70117	down
comp127044_c0	0.000127082	-1.7022	down
comp134860_c0	6.80345e-12	-1.70378	down
comp131748_c0	8.74119e-06	-1.71085	down
comp139895_c0	4.04553e-05	-1.71117	down
comp115713_c0	3.65587e-10	-1.71331	down
comp140066_c0	1.29452e-09	-1.71346	down
comp130875_c0	4.38427e-06	-1.7155	down
comp137496_c0	0.000130297	-1.71622	down
comp128127_c0	0.000976257	-1.71831	down
comp135085_c0	8.87623e-13	-1.71837	down
comp130359_c3	1.61759e-13	-1.72022	down
comp66685_c1	0.00068543	-1.72088	down
comp135598_c0	0.00034731	-1.72542	down
comp135711_c0	2.38773e-05	-1.72688	down
comp161613_c0	0.000250467	-1.72744	down
comp135823_c0	2.26016e-06	-1.72882	down
comp66685_c0	0.000182117	-1.72931	down
comp135239_c0	2.17715e-13	-1.73258	down
comp119722_c0	5.58442e-14	-1.73665	down
comp124071_c0	0.000504977	-1.74129	down
comp132478_c0	6.12843e-14	-1.74209	down
comp123323_c1	1.10893e-05	-1.74259	down
comp127780_c0	1.83187e-13	-1.74403	down
comp133717_c2	2.26485e-13	-1.74482	down
comp141653_c1	1.37522e-07	-1.74859	down
comp134935_c0	7.45114e-05	-1.74894	down
comp128872_c1	1.30894e-08	-1.74952	down
comp123540_c0	0.00229154	-1.75667	down
comp133196_c0	9.65879e-08	-1.75695	down
comp140752_c2	1.32783e-13	-1.76667	down
comp138886_c0	6.73461e-13	-1.76672	down
comp136476_c0	1.4235e-05	-1.7671	down
comp140366_c0	2.64423e-06	-1.76917	down
comp138267_c1	1.99e-08	-1.78019	down
comp116784_c0	3.26131e-06	-1.78061	down
comp134498_c0	1.41911e-05	-1.78078	down
comp134345_c0	3.20058e-05	-1.78089	down
comp127842_c0	0.000273348	-1.78125	down
comp120921_c0	0.008379	-1.78221	down
comp139360_c1	1.89943e-08	-1.78722	down
comp130538_c0	3.96551e-07	-1.79013	down
comp138988_c0	3.21012e-11	-1.79014	down
comp135720_c3	7.75733e-05	-1.79852	down
comp128813_c0	4.74778e-08	-1.80438	down
comp133569_c0	9.94629e-11	-1.80475	down
comp124518_c0	0.00117381	-1.80625	down
comp129706_c0	1.25397e-07	-1.80713	down
comp131476_c0	4.10783e-15	-1.80859	down
comp127059_c0	0.00255821	-1.80929	down
comp121029_c0	1.03295e-09	-1.8131	down
comp127453_c0	0.00584643	-1.8131	down
comp124991_c0	8.58672e-08	-1.81529	down
comp135300_c0	7.22089e-13	-1.81833	down
comp131398_c0	0.000147501	-1.82014	down
comp141577_c0	3.55271e-15	-1.82154	down
comp127332_c0	9.87397e-09	-1.82303	down
comp128872_c0	7.83924e-08	-1.83442	down
comp137061_c0	3.91341e-08	-1.83986	down
comp130444_c0	1.44329e-15	-1.84063	down
comp125023_c0	1.8724e-11	-1.84148	down
comp85549_c0	0.00622597	-1.84768	down
comp67015_c0	0.00965133	-1.85264	down
comp66461_c0	0.000598173	-1.85419	down
comp128647_c0	7.97982e-06	-1.8555	down
comp135091_c0	5.10515e-10	-1.86151	down
comp128714_c0	1.55539e-10	-1.86276	down
comp124716_c0	8.88178e-16	-1.86607	down
comp112592_c0	1.4988e-14	-1.87088	down
comp133117_c0	6.91225e-12	-1.8765	down
comp133545_c0	1.54698e-12	-1.87781	down
comp124092_c0	9.83658e-14	-1.88172	down
comp141079_c1	1.02478e-07	-1.895	down
comp130111_c0	1.91186e-10	-1.89504	down
comp172238_c0	1.47997e-07	-1.90022	down
comp134449_c3	0.00195877	-1.90201	down
comp147253_c0	6.34356e-07	-1.90713	down
comp130003_c0	2.66454e-15	-1.90919	down
comp116795_c0	3.12141e-05	-1.91301	down
comp140286_c0	6.66134e-16	-1.91368	down
comp133791_c1	0.000627822	-1.91388	down
comp135626_c2	0.000153406	-1.91651	down
comp129067_c0	8.00359e-09	-1.91771	down
comp125594_c0	1.47105e-12	-1.91845	down
comp139603_c0	3.61869e-08	-1.91874	down
comp130529_c0	1.28925e-05	-1.91996	down
comp137175_c0	1.28925e-05	-1.91996	down
comp119189_c0	1.27639e-10	-1.92204	down
comp125660_c1	0.00697015	-1.93018	down
comp130861_c0	0.00697015	-1.93018	down
comp129151_c1	7.19085e-08	-1.9312	down
comp129476_c0	0	-1.93337	down
comp132180_c0	8.93996e-12	-1.93748	down
comp120788_c0	0.000638941	-1.94806	down
comp133271_c0	2.55151e-12	-1.95086	down
comp123043_c0	7.65688e-12	-1.95988	down
comp129011_c0	2.88658e-15	-1.96203	down
comp131751_c1	3.0159e-05	-1.96273	down
comp129877_c0	7.56595e-08	-1.96379	down
comp133580_c0	0.00470359	-1.96478	down
comp129300_c0	0	-1.96634	down
comp126544_c0	2.22045e-16	-1.96747	down
comp125736_c0	1.6273e-05	-1.97346	down
comp135288_c1	0.00730676	-1.97998	down
comp127305_c1	8.94091e-06	-1.98323	down
comp130722_c1	4.58883e-08	-1.98513	down
comp129430_c0	2.34254e-11	-1.98771	down
comp126901_c0	5.66547e-11	-1.99535	down
comp128386_c0	0.00316631	-1.99857	down
comp135153_c0	2.98167e-07	-2.0007	down
comp124046_c0	2.9976e-15	-2.009	down
comp140676_c0	3.80806e-14	-2.01467	down
comp100213_c0	4.7769e-06	-2.0171	down
comp156190_c0	7.90479e-14	-2.02508	down
comp68204_c0	6.25143e-06	-2.02644	down
comp122663_c2	7.66701e-11	-2.03506	down
comp127876_c0	1.85099e-09	-2.03624	down
comp119176_c0	0.00759199	-2.03722	down
comp131865_c0	0.000307047	-2.03899	down
comp123648_c0	0	-2.04776	down
comp120006_c0	0.00323929	-2.05177	down
comp183249_c0	0.000443692	-2.05541	down
comp127611_c0	7.98814e-09	-2.05744	down
comp137068_c0	7.40052e-05	-2.05779	down
comp126434_c1	1.30586e-10	-2.07788	down
comp131936_c0	1.39888e-14	-2.07911	down
comp129705_c1	8.4398e-12	-2.08232	down
comp141323_c0	0	-2.08656	down
comp103109_c0	1.74072e-06	-2.09418	down
comp118383_c0	5.76586e-07	-2.10236	down
comp127057_c0	3.60995e-05	-2.10274	down
comp128286_c4	3.60995e-05	-2.10274	down
comp108811_c0	0.00779614	-2.10375	down
comp138062_c0	0	-2.10807	down
comp106379_c1	1.26411e-06	-2.11064	down
comp140208_c0	0	-2.11757	down
comp100414_c0	0	-2.11847	down
comp128407_c0	0	-2.12006	down
comp126854_c0	0.00142405	-2.12016	down
comp132523_c1	2.50776e-07	-2.12044	down
comp140731_c1	2.44693e-13	-2.12555	down
comp133862_c0	2.76446e-14	-2.12814	down
comp124992_c0	0.00029541	-2.13155	down
comp132659_c0	1.33403e-10	-2.14378	down
comp130406_c0	1.11022e-16	-2.15092	down
comp126776_c0	1.48951e-06	-2.1555	down
comp134042_c0	0	-2.16142	down
comp120873_c0	6.07711e-07	-2.17372	down
comp126353_c0	0.00788068	-2.18214	down
comp136901_c0	0.000134299	-2.18684	down
comp130206_c0	4.16334e-14	-2.18839	down
comp123799_c0	4.3864e-07	-2.18999	down
comp122833_c0	2.55215e-07	-2.19019	down
comp124036_c0	5.37348e-14	-2.20868	down
comp128998_c0	4.42218e-05	-2.21239	down
comp120780_c0	0	-2.21671	down
comp119123_c0	0.000915406	-2.21916	down
comp127215_c1	2.21818e-08	-2.23126	down
comp124903_c0	0	-2.24125	down
comp139532_c2	1.56997e-11	-2.24138	down
comp112211_c1	0.00135752	-2.25904	down
comp132616_c0	0	-2.27602	down
comp123358_c0	0	-2.28491	down
comp129117_c3	1.67872e-08	-2.2907	down
comp113606_c0	0.000873193	-2.29538	down
comp139504_c1	0.000873193	-2.29538	down
comp123941_c0	5.61976e-05	-2.29897	down
comp145369_c0	1.22125e-15	-2.30509	down
comp123552_c0	0.00202797	-2.30695	down
comp125958_c0	3.8374e-07	-2.32073	down
comp521337_c0	7.73951e-05	-2.33682	down
comp234582_c0	1.24742e-05	-2.34101	down
comp132277_c1	6.46371e-08	-2.34118	down
comp115742_c0	0	-2.34341	down
comp127908_c0	7.35301e-12	-2.36039	down
comp125524_c4	0.000360184	-2.36543	down
comp131940_c0	1.48002e-11	-2.3839	down
comp66361_c0	5.63948e-06	-2.38894	down
comp120994_c1	9.03565e-10	-2.38994	down
comp117970_c0	0	-2.3932	down
comp124494_c0	1.1352e-11	-2.39335	down
comp127613_c0	1.1019e-05	-2.40356	down
comp83518_c0	2.76577e-08	-2.41379	down
comp126708_c0	0.000514261	-2.42182	down
comp115325_c0	4.6323e-08	-2.42482	down
comp126907_c0	0.000148163	-2.43223	down
comp137374_c0	0	-2.44848	down
comp136947_c0	0	-2.44957	down
comp138643_c0	9.53008e-06	-2.47381	down
comp122663_c1	5.48498e-11	-2.47596	down
comp122931_c0	0	-2.4877	down
comp134901_c0	4.96838e-09	-2.49163	down
comp138786_c0	0	-2.49673	down
comp128095_c0	0	-2.49788	down
comp125641_c0	0	-2.53156	down
comp110356_c0	2.80946e-09	-2.55286	down
comp131746_c0	0	-2.55398	down
comp116577_c0	0.000283173	-2.56805	down
comp117867_c0	7.13819e-11	-2.57149	down
comp138951_c0	0	-2.57215	down
comp114453_c0	2.50433e-08	-2.57793	down
comp23376_c0	0.00412265	-2.58676	down
comp113682_c0	1.60001e-05	-2.58685	down
comp138948_c0	0	-2.60104	down
comp124290_c0	0.000175738	-2.60534	down
comp115931_c0	0	-2.60676	down
comp122182_c0	1.18457e-08	-2.61347	down
comp121198_c0	2.22045e-16	-2.62887	down
comp107654_c0	0.000109043	-2.64168	down
comp129101_c1	0	-2.65776	down
comp140327_c0	0	-2.68423	down
comp106480_c0	0.00146699	-2.68561	down
comp135927_c3	8.17669e-10	-2.68817	down
comp138412_c0	2.70026e-06	-2.69962	down
comp131628_c0	0	-2.71445	down
comp125097_c0	0	-2.72406	down
comp135713_c0	0	-2.72878	down
comp124686_c3	8.75943e-10	-2.73138	down
comp65942_c0	0.0008739	-2.73261	down
comp124078_c0	0.000143517	-2.74009	down
comp123829_c0	0.000520391	-2.77813	down
comp129917_c0	7.1372e-07	-2.77877	down
comp124405_c1	6.37275e-10	-2.7957	down
comp130809_c0	0	-2.79706	down
comp83540_c0	4.58511e-07	-2.80421	down
comp124047_c0	2.06527e-06	-2.80712	down
comp125296_c0	0	-2.82243	down
comp134708_c0	0	-2.83737	down
comp132294_c0	4.65011e-08	-2.84681	down
comp128854_c0	1.89577e-07	-2.85379	down
comp126012_c0	3.33067e-16	-2.85631	down
comp83540_c1	0.000184509	-2.86507	down
comp133361_c1	7.78155e-12	-2.87847	down
comp140885_c1	0.00116624	-2.88392	down
comp120579_c0	1.97446e-05	-2.88744	down
comp127714_c0	0	-2.91065	down
comp114740_c0	0.00828353	-2.91346	down
comp98969_c0	0.00828353	-2.91346	down
comp133861_c0	1.08059e-11	-2.91347	down
comp132570_c0	1.98841e-13	-2.92831	down
comp129558_c0	0	-2.93178	down
comp142625_c0	0	-2.93182	down
comp127352_c0	5.57474e-09	-2.95341	down
comp128136_c0	3.04201e-14	-2.95437	down
comp123952_c0	0	-2.9653	down
comp117337_c0	0	-2.96894	down
comp129220_c0	0	-2.97483	down
comp86019_c0	0.00466087	-2.97703	down
comp134773_c1	0.000392477	-2.98278	down
comp130086_c0	0	-3.00368	down
comp125993_c2	0	-3.02294	down
comp122024_c0	0.00261931	-3.03791	down
comp210005_c0	0.00261931	-3.03791	down
comp443162_c0	0.00261931	-3.03791	down
comp138893_c0	4.61342e-12	-3.05638	down
comp131025_c0	0.00147156	-3.09633	down
comp128129_c0	3.21965e-15	-3.11158	down
comp104800_c0	6.28189e-07	-3.11383	down
comp127725_c0	0	-3.12192	down
comp124660_c0	0	-3.12633	down
comp135963_c0	0.000826998	-3.15248	down
comp128896_c0	0.000261811	-3.25861	down
comp99146_c1	0.000261811	-3.25861	down
comp135779_c0	0.00569664	-3.28474	down
comp4833_c1	0.00569664	-3.28474	down
comp138490_c1	0	-3.30245	down
comp123026_c0	0.000147556	-3.30888	down
comp113323_c0	0.00307164	-3.35445	down
comp153437_c0	8.32729e-05	-3.35747	down
comp139313_c0	0	-3.39401	down
comp128136_c1	8.79297e-14	-3.4229	down
comp125647_c0	3.11436e-08	-3.44723	down
comp244883_c0	2.66408e-05	-3.44998	down
comp126785_c0	3.42171e-13	-3.46133	down
comp124347_c1	1.14764e-08	-3.50252	down
comp107532_c0	4.88142e-06	-3.5785	down
comp167013_c0	0.000262637	-3.60383	down
comp139473_c0	7.77112e-05	-3.71401	down
comp113053_c0	1.33227e-15	-3.7758	down
comp135336_c0	0	-3.82827	down
comp118026_c0	3.32836e-08	-3.90698	down
comp129117_c1	7.00024e-06	-3.91196	down
comp121926_c0	0	-3.92041	down
comp124740_c0	0	-3.94992	down
comp100686_c0	3.85895e-06	-3.95748	down
comp129241_c0	2.1327e-06	-4.0016	down
comp101499_c0	0.00073069	-4.07456	down
comp104996_c0	0.00073069	-4.07456	down
comp181172_c0	0.00073069	-4.07456	down
comp534761_c0	0.00073069	-4.07456	down
comp921597_c0	0.00073069	-4.07456	down
comp98438_c0	0.00073069	-4.07456	down
comp113541_c0	1.88738e-14	-4.11258	down
comp17771_c0	3.65595e-07	-4.12641	down
comp20216_c0	0.000376211	-4.14427	down
comp92903_c0	0.000376211	-4.14427	down
comp93537_c0	0.000376211	-4.14427	down
comp83906_c0	1.14286e-07	-4.204	down
comp107758_c0	0.000194439	-4.21077	down
comp655536_c0	0.000194439	-4.21077	down
comp116536_c0	0.00010088	-4.27434	down
comp124508_c1	0.00010088	-4.27434	down
comp124249_c0	5.25401e-05	-4.33522	down
comp75532_c0	5.25401e-05	-4.33522	down
comp81000_c0	5.25401e-05	-4.33522	down
comp815697_c0	5.25401e-05	-4.33522	down
comp104211_c0	2.74684e-05	-4.39364	down
comp109727_c0	2.74684e-05	-4.39364	down
comp110904_c0	2.74684e-05	-4.39364	down
comp76789_c0	2.74684e-05	-4.39364	down
comp101573_c1	1.44151e-05	-4.44979	down
comp101769_c0	1.44151e-05	-4.44979	down
comp115029_c0	1.44151e-05	-4.44979	down
comp127028_c1	1.44151e-05	-4.44979	down
comp74787_c0	1.44151e-05	-4.44979	down
comp121331_c0	4.01452e-06	-4.55592	down
comp732358_c0	2.13025e-06	-4.60619	down
comp48851_c0	6.06334e-07	-4.70177	down
comp84315_c0	1.75034e-07	-4.79142	down
comp96919_c0	0	-4.8105	down
comp123877_c0	9.45324e-08	-4.83423	down
comp113682_c1	5.12295e-08	-4.87581	down
comp117967_c0	5.12295e-08	-4.87581	down
comp133650_c0	0	-4.8818	down
comp121285_c0	0	-4.88728	down
comp111179_c0	2.78563e-08	-4.91623	down
comp81158_c0	1.51975e-08	-4.95554	down
comp106000_c0	8.31863e-09	-4.99381	down
comp67514_c0	0	-5.07981	down
comp117880_c1	1.39097e-09	-5.10289	down
comp125524_c0	1.39097e-09	-5.10289	down
comp130418_c1	0	-5.11628	down
comp119632_c0	2.39276e-10	-5.20429	down
comp120098_c0	7.51509e-11	-5.26814	down
comp100214_c0	4.2306e-11	-5.29903	down
comp46708_c0	1.58318e-13	-5.57627	down
comp114578_c0	3.11973e-14	-5.65002	down
comp121091_c0	1.07692e-14	-5.69717	down
comp82700_c0	2.22045e-15	-5.76513	down
comp126859_c0	0	-5.9321	down
comp125915_c0	0	-6.15112	down
comp118321_c0	0	-6.18459	down
comp130500_c0	0	-6.21731	down
comp126603_c1	0	-6.35599	down
comp127796_c0	0	-6.38508	down
comp125671_c0	0	-6.52232	down
comp112536_c0	0	-6.6832	down
comp119626_c0	0	-6.7293	down
comp77962_c0	0	-6.74059	down
comp101052_c0	0	-7.1912	down
comp122584_c0	0	-7.44709	down

## Sheet: ME6 vs. ME3
#ID	FDR	log2FC	regulated
comp100161_c0	4.18411e-05	4.43495	up
comp100273_c1	0.000497996	4.18519	up
comp100946_c0	7.26895e-05	3.75914	up
comp1011406_c0	0.000266464	4.2518	up
comp101233_c0	2.39624e-08	2.23704	up
comp101615_c0	0	6.79475	up
comp101636_c0	0	8.46175	up
comp101657_c0	0.00253919	1.53674	up
comp101831_c0	3.04079e-11	5.43026	up
comp102148_c0	3.33067e-16	2.25868	up
comp102493_c1	0.000266464	4.2518	up
comp102590_c0	1.28985e-06	1.64752	up
comp102727_c1	3.57416e-07	4.83322	up
comp102926_c0	0.000720476	3.53814	up
comp102932_c0	6.13823e-07	1.51589	up
comp103137_c0	0	7.87003	up
comp103419_c0	3.61155e-08	4.99751	up
comp103427_c0	0	5.01897	up
comp104228_c0	0.00542138	1.07854	up
comp104958_c1	0.00973825	2.01941	up
comp105074_c0	1.24276e-05	4.54529	up
comp105074_c1	1.55431e-15	5.91434	up
comp105094_c0	4.2765e-07	1.62577	up
comp105986_c0	0.000511396	1.24614	up
comp106206_c0	2.27576e-05	4.49117	up
comp106336_c0	7.46304e-10	5.24648	up
comp106354_c0	9.99201e-15	5.82966	up
comp106539_c0	1.10301e-12	1.98175	up
comp106689_c0	7.38615e-06	2.00792	up
comp106806_c0	2.05418e-08	5.03581	up
comp106958_c0	0	7.21769	up
comp107332_c0	0	6.98297	up
comp107332_c1	0	7.35279	up
comp107353_c0	5.92637e-11	2.35564	up
comp107365_c0	2.00436e-07	4.87608	up
comp107579_c0	0.000764684	1.7812	up
comp107676_c0	2.49512e-12	4.46459	up
comp107706_c0	0.000211495	2.12772	up
comp1077385_c0	6.71386e-09	5.10951	up
comp107745_c1	0.0023705	1.98539	up
comp108095_c0	1.55431e-15	5.91434	up
comp108284_c0	0.000856247	1.51042	up
comp1082927_c0	0.000143167	4.31547	up
comp108412_c0	0	7.38282	up
comp1084939_c0	6.81334e-06	4.59745	up
comp1088818_c0	1.17239e-08	5.07313	up
comp108955_c0	0.00122798	1.06488	up
comp108984_c1	5.55112e-16	5.95489	up
comp1092115_c0	1.14907e-06	4.74348	up
comp109261_c1	0.0032153	2.79518	up
comp109414_c0	0	6.49924	up
comp110137_c0	3.82994e-07	2.52266	up
comp110334_c1	0.0032153	2.79518	up
comp110356_c0	0.0063188	1.54288	up
comp110412_c0	7.86899e-06	2.12708	up
comp110898_c0	0.00274638	1.16154	up
comp111329_c0	3.90817e-06	1.35093	up
comp111444_c0	0.00690084	1.4142	up
comp111671_c0	0.00982878	1.95904	up
comp111688_c0	0.00116078	2.89768	up
comp111788_c0	0.000969609	1.60451	up
comp111855_c1	0.000110828	1.86724	up
comp112014_c0	0.00205868	1.04042	up
comp112183_c0	3.77976e-06	2.34605	up
comp112580_c0	0.000932245	1.0846	up
comp112623_c0	2.00436e-07	4.87608	up
comp113020_c0	7.80499e-09	1.87601	up
comp113264_c0	1.99348e-10	1.65203	up
comp113280_c0	3.73483e-05	2.63739	up
comp113541_c0	1.13956e-06	2.69989	up
comp113626_c0	0.000142495	1.16327	up
comp113630_c0	5.14437e-11	5.40121	up
comp114254_c0	1.94768e-07	1.78714	up
comp114426_c0	6.44735e-08	1.47722	up
comp114433_c0	0.00423304	1.16839	up
comp114655_c0	0.00912337	2.17217	up
comp114670_c0	1.39853e-07	2.01585	up
comp114673_c0	0.00292554	1.10144	up
comp115343_c1	0	7.30167	up
comp115432_c0	3.22276e-06	2.3141	up
comp115520_c0	0.00058144	1.77824	up
comp115524_c0	9.64764e-06	1.27446	up
comp115533_c0	0.000107967	1.19237	up
comp115543_c0	0.00870243	1.15856	up
comp115742_c0	7.80719e-09	1.53332	up
comp115890_c0	8.67639e-13	4.92441	up
comp115940_c0	0	2.26789	up
comp115977_c0	0.000720476	3.53814	up
comp116030_c0	2.06943e-07	2.19637	up
comp116074_c0	7.95583e-09	2.90107	up
comp116087_c0	2.12755e-06	1.45839	up
comp116338_c0	0.000476711	2.44109	up
comp116420_c0	0	3.199	up
comp116677_c0	3.79621e-08	1.70303	up
comp116716_c0	0.000891142	1.26425	up
comp116730_c0	1.71021e-05	2.2134	up
comp116878_c1	0.00338606	1.08084	up
comp116909_c1	0.00448827	2.0931	up
comp116919_c0	0	5.77219	up
comp116929_c1	0.000438609	1.11504	up
comp116993_c1	0.000198462	1.51336	up
comp117066_c2	0.000111508	1.2106	up
comp117066_c3	5.31468e-05	1.39041	up
comp117093_c0	0.0048887	2.43905	up
comp117215_c0	0.00200861	1.04096	up
comp117222_c0	0.00369886	1.0109	up
comp117250_c0	0.000151289	3.33135	up
comp117267_c0	0.00319104	2.06296	up
comp117337_c0	5.33795e-13	2.55935	up
comp117382_c0	0.00855701	1.69344	up
comp117459_c0	3.12526e-05	1.55619	up
comp117486_c0	0.00676985	1.99452	up
comp117782_c0	0.000616354	1.45901	up
comp117867_c0	2.89324e-13	2.6146	up
comp117980_c2	2.27576e-05	4.49117	up
comp117984_c0	0.00366444	1.07278	up
comp117997_c0	0.000777029	2.61327	up
comp118055_c0	0.00027567	2.15478	up
comp118086_c0	8.70696e-10	4.56291	up
comp118187_c0	0.000102901	2.33619	up
comp118642_c0	0.00888209	2.68484	up
comp118786_c0	8.63559e-08	1.69236	up
comp118857_c0	1.87614e-10	2.95262	up
comp119033_c0	0.000419539	2.99337	up
comp119164_c0	3.71935e-06	1.70478	up
comp119436_c0	3.61429e-06	1.55331	up
comp119456_c0	6.68132e-12	1.90338	up
comp119570_c0	5.4224e-07	1.42557	up
comp119795_c0	0.0011533	1.07082	up
comp119843_c0	0.000928741	1.93849	up
comp119948_c0	0.000823268	1.19541	up
comp119973_c0	3.33067e-16	2.23406	up
comp120034_c0	0	5.38905	up
comp120042_c0	1.42809e-05	1.41272	up
comp120048_c0	0.000854871	1.08451	up
comp120286_c0	1.15265e-08	2.88225	up
comp120298_c0	0.00552033	2.31527	up
comp120303_c0	6.0294e-06	1.63402	up
comp120394_c0	0.000769644	1.14461	up
comp120459_c0	0.0065954	1.27232	up
comp120490_c0	8.49631e-12	2.17021	up
comp120514_c0	0.0035612	1.27532	up
comp120524_c0	0.00145848	1.38531	up
comp120622_c0	0.0020416	1.29848	up
comp1206405_c0	0.000143167	4.31547	up
comp120640_c0	0.000955501	1.90204	up
comp120710_c0	0	4.58651	up
comp120780_c0	0.000129478	1.20494	up
comp120788_c0	0.000466586	1.61411	up
comp120829_c0	1.14684e-11	1.74585	up
comp120872_c0	0.00520088	1.03051	up
comp120895_c0	0.000720686	1.43605	up
comp120934_c0	3.26295e-13	2.25716	up
comp120950_c0	0.00658184	1.13011	up
comp120952_c0	0	2.34771	up
comp121010_c0	0.00883695	1.72037	up
comp121079_c0	3.10598e-05	2.87519	up
comp121112_c0	0.00644214	1.16505	up
comp121158_c0	7.16571e-10	1.75398	up
comp121181_c0	4.2245e-06	1.55809	up
comp121212_c0	0.00320927	1.43976	up
comp121223_c0	8.40429e-05	1.51397	up
comp121225_c0	0.000908282	1.31077	up
comp121235_c1	0.000396712	1.44222	up
comp121304_c0	2.72437e-05	1.6614	up
comp121305_c0	0.00128587	3.47717	up
comp1213062_c0	0.000497996	4.18519	up
comp121371_c0	7.30036e-08	2.72121	up
comp121385_c0	6.67529e-06	1.43456	up
comp121559_c0	0.000362718	1.9734	up
comp121593_c0	3.63755e-05	1.25906	up
comp121652_c0	8.13048e-05	1.41315	up
comp121739_c0	0.00868427	1.45678	up
comp121835_c0	0.000140283	1.47535	up
comp121877_c0	0.00680264	1.8503	up
comp121999_c0	2.02511e-05	1.365	up
comp122003_c0	0	7.83787	up
comp122051_c0	6.07967e-11	1.77479	up
comp122133_c0	0.00951349	2.08955	up
comp122136_c0	1.01449e-06	1.7132	up
comp122152_c0	1.93859e-09	3.63878	up
comp1221575_c0	2.00436e-07	4.87608	up
comp122191_c1	3.62232e-12	2.30152	up
comp122243_c0	0.00427458	1.43933	up
comp122322_c0	1.79726e-07	1.51577	up
comp122410_c0	7.46783e-06	3.32302	up
comp122412_c0	1.70728e-06	1.35681	up
comp122463_c0	0.000999064	1.64713	up
comp122478_c2	1.68001e-05	1.35721	up
comp122514_c0	1.85359e-05	1.29016	up
comp122571_c0	0.00149508	2.12831	up
comp122595_c0	0.000108169	2.47269	up
comp122628_c0	0	2.48669	up
comp122704_c2	0.00293366	1.4888	up
comp122841_c0	0.00317852	1.05875	up
comp122845_c0	7.47215e-05	1.48604	up
comp122921_c1	0.00031235	1.8679	up
comp122931_c0	1.23562e-07	1.63869	up
comp123009_c0	0.000813939	1.09394	up
comp123011_c0	1.58137e-11	4.78041	up
comp123041_c0	9.90296e-05	1.20214	up
comp123063_c0	1.00878e-11	2.1311	up
comp123109_c0	3.66757e-07	2.93984	up
comp123182_c1	3.11883e-06	1.54893	up
comp123240_c1	9.34561e-07	1.43986	up
comp123245_c0	3.72849e-06	3.63244	up
comp123271_c0	0.0010969	2.09843	up
comp123288_c0	0.00031235	1.8679	up
comp123317_c0	0.00244831	1.05487	up
comp123350_c0	2.26599e-06	1.36086	up
comp123432_c0	0.00321497	1.31628	up
comp123435_c0	0.00976555	1.58315	up
comp123470_c0	5.62963e-08	1.46767	up
comp123497_c0	0.00137966	1.12412	up
comp123546_c0	3.16969e-13	1.84141	up
comp123581_c0	0.000682945	1.32753	up
comp123595_c0	3.43865e-09	1.68949	up
comp123636_c0	0.00285204	1.02838	up
comp12376_c0	5.14437e-11	5.40121	up
comp123784_c0	9.88098e-15	2.09521	up
comp123810_c0	0.00338151	1.95512	up
comp123849_c0	0.000194207	1.15831	up
comp123855_c0	0.00354038	1.03717	up
comp123874_c0	0.00929884	1.32634	up
comp123985_c0	1.16748e-10	3.03469	up
comp124009_c0	7.86899e-06	2.12708	up
comp124012_c0	0.0013867	1.08674	up
comp124046_c0	0	2.45178	up
comp124065_c0	0.000246636	2.03606	up
comp124071_c0	0.000324799	2.25074	up
comp124103_c1	1.69288e-08	1.69284	up
comp124130_c1	0.00012122	1.66269	up
comp124288_c0	0.000222571	1.41366	up
comp124325_c0	3.58126e-05	1.55972	up
comp124477_c0	0	2.27281	up
comp124601_c0	0.00629551	1.04302	up
comp124614_c0	0.00541743	1.00754	up
comp124660_c0	2.44249e-15	1.99747	up
comp124716_c0	2.52542e-07	1.42497	up
comp125119_c0	0	4.5979	up
comp125183_c0	1.11022e-16	3.2576	up
comp125225_c1	0.00910556	1.02144	up
comp125239_c0	0.0045379	1.39627	up
comp125332_c0	0.00363899	1.19671	up
comp125388_c0	0.000295854	1.1303	up
comp125410_c0	0.00981281	1.90649	up
comp125464_c0	0.00388015	1.59887	up
comp125524_c0	0.0048887	2.43905	up
comp125554_c0	0.00344448	1.01541	up
comp125607_c1	0.00170168	1.11275	up
comp125618_c0	0.00309085	2.48461	up
comp125619_c0	0	3.79559	up
comp125622_c0	2.22073e-09	1.74918	up
comp125632_c0	3.13589e-06	1.3252	up
comp125641_c0	2.09568e-07	1.59389	up
comp125690_c0	0.000156618	1.80536	up
comp125698_c0	0.00100882	1.20438	up
comp125808_c0	6.32649e-05	1.59211	up
comp125847_c0	5.87292e-09	2.07653	up
comp125885_c0	2.64977e-07	1.69476	up
comp125906_c1	0.00675252	1.12286	up
comp125913_c0	0.000104648	2.66167	up
comp126106_c0	0.00590821	1.316	up
comp126118_c0	2.53693e-06	1.543	up
comp126159_c0	0.00971767	1.15986	up
comp126169_c0	0.000360053	1.34191	up
comp126174_c0	6.2742e-12	1.77894	up
comp126193_c0	4.19397e-07	2.56872	up
comp126352_c0	1.37754e-10	2.16088	up
comp126381_c1	0.000156336	1.61619	up
comp126410_c0	0.00159342	1.05962	up
comp126414_c2	0.00180536	1.71816	up
comp126450_c1	0.000196901	1.21619	up
comp126585_c2	0.00256828	1.35437	up
comp126727_c0	0.000358796	1.52187	up
comp126761_c0	3.70041e-05	1.25432	up
comp126788_c0	0.000769585	1.15873	up
comp126796_c1	0.000200707	1.15826	up
comp126804_c0	0.000577555	1.10581	up
comp126813_c1	0.000567186	1.24052	up
comp126816_c0	0.000152114	3.08311	up
comp126833_c0	3.77591e-05	1.31915	up
comp126883_c1	0.00259734	1.02854	up
comp126940_c0	0.000335107	1.26727	up
comp126956_c0	4.80758e-06	2.54204	up
comp127054_c0	3.10561e-06	1.68851	up
comp127074_c0	6.90679e-09	1.54087	up
comp127084_c0	1.61266e-06	1.75895	up
comp127121_c0	1.68336e-10	1.67549	up
comp127210_c0	8.42738e-05	1.22008	up
comp127280_c0	0.00160193	1.58363	up
comp127295_c0	0.000770858	1.29024	up
comp127332_c0	0.00783353	1.12272	up
comp127342_c0	0.00480044	1.07048	up
comp127459_c0	2.21857e-09	3.33335	up
comp127478_c1	5.04699e-05	1.25997	up
comp127513_c1	0.00981945	1.1225	up
comp127581_c0	0.000128092	1.16849	up
comp127651_c1	0.000222967	1.91697	up
comp127655_c0	0.0089644	1.01613	up
comp127681_c0	4.79319e-07	1.71293	up
comp127722_c0	2.11844e-10	1.68609	up
comp127725_c0	7.97e-06	1.41172	up
comp127728_c0	0.000356312	1.12753	up
comp127757_c0	0.000483661	1.12483	up
comp127797_c0	5.50492e-08	2.08495	up
comp127804_c0	6.64188e-10	2.00105	up
comp127842_c0	0.00022147	2.27979	up
comp127878_c0	2.52963e-08	1.67746	up
comp127885_c0	1.80616e-06	1.84773	up
comp127894_c0	0.00580707	1.3873	up
comp127905_c1	0.000476711	2.44109	up
comp127958_c1	0.00176675	1.67754	up
comp127959_c0	0.000189932	1.16833	up
comp127981_c3	0.00855701	1.69344	up
comp127990_c0	0.00323044	1.04422	up
comp128011_c1	7.7239e-05	4.37645	up
comp128011_c2	0	3.24023	up
comp128024_c0	5.11226e-10	2.04611	up
comp128056_c1	2.00436e-07	4.87608	up
comp128062_c0	0.000595901	1.717	up
comp128095_c0	4.06876e-07	1.65635	up
comp128100_c0	0.00388015	1.59887	up
comp128155_c1	1.17146e-05	1.54377	up
comp128165_c0	4.07106e-05	1.71496	up
comp128173_c1	1.43685e-06	1.7792	up
comp128272_c1	0.0013617	1.21857	up
comp128343_c0	0.000401619	1.1662	up
comp128354_c1	0.00229932	3.4135	up
comp128405_c0	2.60902e-14	2.19276	up
comp128407_c0	5.44009e-15	1.97889	up
comp128500_c0	0.000759578	3.18022	up
comp128552_c0	0.00180536	1.71816	up
comp128652_c1	0.0061244	1.00562	up
comp128654_c0	0.00816815	1.52217	up
comp128696_c5	5.41688e-11	2.67094	up
comp128714_c0	0.00018746	1.2744	up
comp128811_c0	7.43351e-05	1.19248	up
comp128865_c0	0.000255594	1.19825	up
comp128869_c0	1.0878e-11	1.83521	up
comp128872_c0	0.000280054	1.46267	up
comp128872_c1	0.000240507	1.31279	up
comp128890_c0	3.10363e-06	1.38157	up
comp128925_c1	0.000490097	2.65372	up
comp129001_c0	3.63871e-06	1.80256	up
comp129022_c0	3.44724e-13	2.665	up
comp129045_c1	2.14743e-07	1.73919	up
comp129049_c0	0.00274223	1.22519	up
comp129101_c1	0	3.08507	up
comp129113_c0	0.00684898	1.06709	up
comp129172_c0	7.69008e-07	1.42931	up
comp129220_c0	2.88851e-08	2.02927	up
comp129237_c0	0	7.03117	up
comp129337_c0	3.47039e-07	1.57326	up
comp129408_c0	0.000280765	1.14368	up
comp129486_c0	0.000596548	2.77949	up
comp129528_c0	0.00684112	1.94031	up
comp129549_c0	0	2.24615	up
comp129581_c0	6.14919e-05	2.03051	up
comp129605_c0	2.56007e-11	1.77284	up
comp129616_c0	6.12831e-07	1.65841	up
comp129678_c0	1.3878e-06	1.39548	up
comp129706_c0	0.000743608	1.44735	up
comp129755_c0	0.000858959	1.09127	up
comp129776_c0	1.20431e-06	1.3881	up
comp129810_c0	3.0139e-08	1.60982	up
comp129838_c0	6.1049e-05	1.81132	up
comp129884_c0	2.93261e-08	3.48721	up
comp129922_c0	0.00700211	1.06667	up
comp12994_c0	0.000143167	4.31547	up
comp129958_c0	3.1619e-05	1.32997	up
comp130003_c0	0.000192723	1.17246	up
comp130033_c0	0.000283388	1.14745	up
comp130051_c0	0.00448827	2.0931	up
comp130062_c0	0.00510523	1.416	up
comp130111_c0	0.000107177	1.60173	up
comp13011_c0	0	6.47048	up
comp130209_c0	0.000942061	1.08082	up
comp130242_c0	2.41702e-09	1.62095	up
comp130269_c0	7.24407e-06	1.31918	up
comp130280_c0	0.00586564	1.02665	up
comp130326_c0	0.00129162	1.10618	up
comp130366_c0	6.07292e-14	1.88378	up
comp130390_c0	0.00012849	3.70699	up
comp130415_c0	1.23644e-05	1.85712	up
comp130418_c1	3.10862e-15	4.75938	up
comp130421_c2	0.000350039	1.12628	up
comp130634_c1	4.54081e-13	2.2952	up
comp130682_c0	3.69642e-05	1.26835	up
comp130697_c0	0.000434019	1.50241	up
comp130734_c1	5.79176e-06	1.31238	up
comp130787_c0	3.64249e-09	2.40912	up
comp130841_c0	0.00545479	1.30889	up
comp130898_c0	0.00176675	1.67754	up
comp130899_c0	0.000664559	1.17234	up
comp130929_c0	8.32016e-09	1.54339	up
comp130962_c2	2.22045e-16	4.03409	up
comp130996_c0	0.0026804	1.05139	up
comp131025_c0	0.00661869	2.9504	up
comp131080_c0	7.74344e-05	1.68912	up
comp131119_c0	3.93311e-06	1.36821	up
comp131134_c0	7.59649e-05	1.81476	up
comp131167_c0	0.00400562	1.00881	up
comp131303_c1	0.00360244	1.0489	up
comp131345_c0	0.00281977	1.36746	up
comp131408_c0	6.91725e-09	2.17663	up
comp131469_c0	0.00111331	2.36923	up
comp131522_c2	0.00401805	1.18792	up
comp131542_c0	0.00455013	1.15164	up
comp131587_c2	1.11869e-09	1.61065	up
comp131591_c1	0.000139706	1.49126	up
comp131628_c0	2.31932e-07	1.57324	up
comp131716_c0	1.22851e-06	1.92401	up
comp131746_c0	0.000227558	1.24348	up
comp131751_c1	2.14169e-07	3.20963	up
comp131778_c0	1.8638e-06	2.08334	up
comp131788_c0	0.00185525	1.08159	up
comp131793_c0	0.00473211	1.32518	up
comp132034_c0	9.96588e-05	1.25298	up
comp132082_c0	0	2.66232	up
comp132150_c1	3.1143e-05	1.9047	up
comp132168_c1	0.000350598	1.22326	up
comp132185_c3	0	2.17458	up
comp132218_c0	0.00897116	1.03086	up
comp132274_c0	0.000229674	2.07962	up
comp132311_c0	0.00123109	1.1	up
comp132319_c2	2.77015e-06	1.42229	up
comp132409_c0	1.72734e-09	2.17039	up
comp132491_c0	0.00394421	1.22652	up
comp132616_c0	9.2959e-13	1.88043	up
comp132712_c0	0.00314014	1.10902	up
comp132796_c0	1.01287e-06	1.58859	up
comp132808_c0	0.00142778	1.43453	up
comp132993_c0	0.00953163	1.04301	up
comp132994_c0	3.05981e-07	1.4068	up
comp133032_c0	0.00510578	1.00154	up
comp133256_c0	0.00338498	1.01581	up
comp133312_c1	2.72703e-05	1.24473	up
comp133346_c0	8.13393e-05	1.30561	up
comp133379_c0	0.00301369	1.0718	up
comp133421_c0	0.000749705	1.08843	up
comp133641_c1	5.93043e-05	1.62692	up
comp133689_c0	4.14004e-09	1.57949	up
comp133830_c0	3.08877e-08	1.59938	up
comp133840_c0	8.15057e-10	1.76327	up
comp133876_c0	1.49987e-09	1.88732	up
comp133884_c0	6.96968e-11	1.68999	up
comp133905_c0	0.00501069	1.12969	up
comp134000_c0	0.00385789	1.1426	up
comp134044_c4	0.00282486	1.06306	up
comp134076_c0	0.000154434	1.21081	up
comp134205_c1	0.00930802	1.13069	up
comp134239_c0	0.000385704	1.42776	up
comp134323_c0	0.000224107	1.14253	up
comp134479_c1	3.57979e-07	3.04939	up
comp134583_c0	0.00413354	1.10252	up
comp134597_c0	4.29638e-07	1.78699	up
comp134854_c0	0.000548958	1.10561	up
comp134868_c3	2.54469e-06	1.32651	up
comp134875_c0	0.0001922	2.18117	up
comp134938_c1	1.11022e-15	3.07383	up
comp134964_c0	2.87344e-05	1.36365	up
comp134964_c3	0.000439558	1.34956	up
comp135161_c0	0.00186173	1.09692	up
comp135175_c1	0.00102173	1.15146	up
comp135228_c0	3.20843e-05	1.2298	up
comp135238_c0	0	3.12556	up
comp135249_c0	0.000375144	1.13811	up
comp135295_c0	1.55431e-15	2.72729	up
comp135336_c0	1.11022e-16	2.76781	up
comp135415_c0	0.00284634	1.03208	up
comp135429_c1	0.000465649	1.68323	up
comp135456_c2	1.23406e-06	1.37383	up
comp135464_c0	0.00162137	1.06439	up
comp135539_c0	1.53685e-05	1.27681	up
comp135620_c0	0.00234913	1.04082	up
comp135713_c0	4.53625e-10	1.72904	up
comp135788_c0	7.26192e-06	1.59586	up
comp135973_c0	8.99587e-07	1.54868	up
comp136045_c0	6.19509e-11	1.68727	up
comp136150_c0	0.00544969	1.00102	up
comp136214_c0	5.23163e-06	1.66314	up
comp136282_c0	0.00231642	1.03638	up
comp136363_c0	0.000212223	1.15187	up
comp136384_c0	0.00214617	1.11525	up
comp136708_c0	5.79017e-05	1.20107	up
comp136895_c0	1.48091e-05	1.2658	up
comp136932_c0	0.000506397	1.38779	up
comp136947_c0	2.22045e-16	2.15748	up
comp137049_c1	2.49426e-10	1.64501	up
comp137068_c0	0.000115957	2.12758	up
comp137068_c1	0	2.71788	up
comp137195_c0	0	3.58581	up
comp137424_c0	1.25932e-06	1.35185	up
comp13762_c0	0.000143167	4.31547	up
comp137747_c0	2.33147e-15	2.02985	up
comp137826_c0	0.000461545	1.58036	up
comp137894_c1	0.00123178	2.57165	up
comp138022_c0	0.00132159	1.06178	up
comp138024_c0	0	5.03997	up
comp138024_c1	1.37867e-12	5.59326	up
comp138161_c1	1.24645e-06	1.37613	up
comp138180_c0	0.000538638	1.10723	up
comp138208_c0	0.00226242	1.03792	up
comp138296_c3	0.000505013	1.46447	up
comp138492_c0	0.000728076	1.09201	up
comp138496_c0	5.34683e-12	1.80088	up
comp138496_c1	0.00179428	1.8871	up
comp138948_c0	2.23853e-06	1.33926	up
comp138988_c0	2.22045e-16	2.32463	up
comp139054_c0	4.12307e-06	1.42116	up
comp139067_c1	0.00273205	1.36293	up
comp139180_c0	0.00838772	1.20867	up
comp139313_c0	2.53202e-05	1.89803	up
comp139347_c0	0.0001731	1.19113	up
comp139374_c0	0.000162915	2.44177	up
comp139422_c2	2.77223e-13	1.84882	up
comp139583_c0	4.28988e-05	1.2155	up
comp139598_c2	1.51112e-08	3.3639	up
comp139731_c0	0.00446313	1.08159	up
comp139814_c0	4.57121e-07	1.39136	up
comp140051_c0	0.000537706	1.1332	up
comp140208_c0	4.02866e-05	1.3567	up
comp140275_c0	1.66229e-06	1.8046	up
comp140291_c0	5.13367e-08	1.93891	up
comp140388_c0	7.2677e-06	1.79788	up
comp140512_c0	2.82846e-07	2.06772	up
comp140523_c1	7.20535e-14	1.91748	up
comp140595_c0	0.000484805	1.27689	up
comp140666_c0	0.00108005	1.26282	up
comp140781_c0	6.13947e-05	1.36945	up
comp140861_c0	0.00144469	1.20955	up
comp141257_c1	3.16941e-11	1.77211	up
comp141373_c0	5.72912e-05	1.40705	up
comp141373_c1	0.00494416	1.1933	up
comp141577_c0	1.30676e-06	1.35074	up
comp141607_c0	0.000823757	1.08427	up
comp142316_c1	0.00636716	1.01709	up
comp142600_c1	1.06137e-13	1.88863	up
comp142662_c0	2.11706e-05	1.63695	up
comp142662_c1	8.88558e-05	1.24626	up
comp145269_c0	0.000167067	1.15542	up
comp146334_c0	0.000427362	1.12075	up
comp146381_c0	3.0416e-08	1.5183	up
comp146683_c0	7.68484e-08	1.48614	up
comp146809_c0	0.00115905	1.07296	up
comp152445_c0	0.000280556	1.15062	up
comp15290_c0	0.000497996	4.18519	up
comp154370_c0	0.00454425	1.71935	up
comp156190_c0	0.00530015	1.18317	up
comp156280_c0	2.88807e-06	1.46367	up
comp15797_c0	2.07186e-06	4.69642	up
comp16593_c0	3.74995e-06	4.64778	up
comp17014_c0	0.000497996	4.18519	up
comp171155_c0	0.00684112	1.94031	up
comp17372_c0	1.90017e-10	4.64836	up
comp181144_c0	8.44091e-07	2.88935	up
comp18339_c0	1.24276e-05	4.54529	up
comp18502_c0	2.27576e-05	4.49117	up
comp186581_c0	0.00241056	1.38497	up
comp1948_c1	2.53658e-10	5.31037	up
comp19596_c0	1.24276e-05	4.54529	up
comp20074_c0	1.85407e-13	5.69251	up
comp20103_c0	3.04978e-13	5.66833	up
comp20370_c0	0	6.12445	up
comp207749_c0	5.71823e-08	2.21635	up
comp20867_c0	9.174e-05	3.12597	up
comp21149_c0	1.14907e-06	4.74348	up
comp21227_c0	7.7239e-05	4.37645	up
comp215965_c0	0	8.19178	up
comp2258_c0	6.39671e-07	4.78904	up
comp22820_c0	1.28622e-09	5.21343	up
comp2288_c0	7.7239e-05	4.37645	up
comp230628_c0	0	6.97314	up
comp232271_c0	0	6.87089	up
comp2382_c0	1.24276e-05	4.54529	up
comp245123_c0	0	6.99274	up
comp2489_c0	1.48576e-10	5.34129	up
comp25168_c0	6.39166e-12	5.51406	up
comp26292_c0	0	6.67849	up
comp272130_c0	0	7.7134	up
comp27528_c0	0.000266464	4.2518	up
comp275693_c0	0	6.05154	up
comp27606_c0	3.74995e-06	4.64778	up
comp278309_c0	0	6.52537	up
comp278900_c0	0.00069773	2.19082	up
comp282542_c0	0	6.26008	up
comp28325_c0	2.22388e-09	5.17962	up
comp285081_c0	0.000776198	1.68121	up
comp29663_c0	3.04079e-11	5.43026	up
comp297454_c0	0	6.33879	up
comp297586_c0	2.22045e-16	6.01366	up
comp29829_c0	2.07186e-06	4.69642	up
comp29846_c0	1.1291e-13	5.71629	up
comp2993_c0	0	6.41343	up
comp29994_c0	1.85407e-13	5.69251	up
comp300751_c0	0	6.30782	up
comp304154_c0	0	6.51449	up
comp30615_c0	1.24276e-05	4.54529	up
comp309895_c0	8.31335e-13	5.61872	up
comp311714_c0	0	6.10657	up
comp314311_c0	0	6.30782	up
comp314998_c0	9.99201e-15	5.82966	up
comp318228_c0	0	7.33754	up
comp322227_c0	0	6.05154	up
comp3310_c0	1.28622e-09	5.21343	up
comp332762_c0	0	7.41224	up
comp3331_c0	3.33067e-16	5.97475	up
comp335529_c0	0	7.02166	up
comp336925_c0	0.000561071	1.5376	up
comp33806_c0	1.14907e-06	4.74348	up
comp342560_c0	0.0048887	2.43905	up
comp34318_c0	8.72933e-11	5.37156	up
comp353216_c0	2.22045e-16	5.99433	up
comp353646_c0	0	6.98297	up
comp359114_c0	4.24105e-14	5.76271	up
comp3600_c0	0.000497996	4.18519	up
comp363714_c0	0	7.36036	up
comp365975_c0	0	6.76085	up
comp366967_c0	5.36793e-05	2.98208	up
comp3675_c0	0.000497996	4.18519	up
comp369377_c0	0	6.42791	up
comp37162_c1	2.59792e-14	5.78538	up
comp386369_c0	0	6.17682	up
comp388389_c0	3.04978e-13	5.66833	up
comp39671_c0	2.22388e-09	5.17962	up
comp4029_c1	2.05418e-08	5.03581	up
comp411706_c0	5.14437e-11	5.40121	up
comp415027_c0	1.07186e-11	5.48666	up
comp418053_c0	3.82239e-12	5.54094	up
comp4212_c0	1.85407e-13	5.69251	up
comp4212_c1	4.3852e-06	3.99491	up
comp422880_c0	3.85767e-09	5.14499	up
comp42739_c0	3.77476e-15	5.87262	up
comp42842_c0	4.18411e-05	4.43495	up
comp432116_c0	6.37171e-08	4.95815	up
comp4328_c0	1.24276e-05	4.54529	up
comp434795_c0	3.46326e-08	3.68015	up
comp442332_c0	0	6.65408	up
comp4434_c1	2.27576e-05	4.49117	up
comp451879_c0	2.22388e-09	5.17962	up
comp4557_c0	0.000266464	4.2518	up
comp4561_c0	0	6.4844	up
comp45790_c0	4.18411e-05	4.43495	up
comp46123_c0	8.72933e-11	5.37156	up
comp461870_c0	0	6.08846	up
comp463938_c0	8.31335e-13	5.61872	up
comp464390_c0	6.39166e-12	5.51406	up
comp4743_c0	3.57416e-07	4.83322	up
comp4770_c0	6.37171e-08	4.95815	up
comp479084_c0	4.18411e-05	4.43495	up
comp481277_c0	5.0282e-13	5.64374	up
comp48198_c0	1.14907e-06	4.74348	up
comp485341_c0	6.81334e-06	4.59745	up
comp489267_c0	4.3441e-10	5.27878	up
comp490303_c0	1.14907e-06	4.74348	up
comp49064_c0	1.24276e-05	4.54529	up
comp493842_c0	2.00436e-07	4.87608	up
comp495984_c0	2.53658e-10	5.31037	up
comp499057_c0	1.48576e-10	5.34129	up
comp513051_c0	1.55431e-15	5.91434	up
comp514541_c0	2.34496e-05	3.85812	up
comp514791_c0	1.07186e-11	5.48666	up
comp516052_c0	8.31335e-13	5.61872	up
comp51667_c0	0.000143167	4.31547	up
comp518033_c0	5.0282e-13	5.64374	up
comp522484_c0	0	6.27617	up
comp522884_c0	6.71386e-09	5.10951	up
comp5288_c0	2.29228e-12	5.56734	up
comp5288_c1	7.46304e-10	5.24648	up
comp5317_c0	0.00534779	2.74107	up
comp5334_c0	7.46304e-10	5.24648	up
comp539474_c0	0.00116078	2.89768	up
comp542478_c0	1.48576e-10	5.34129	up
comp546902_c0	8.88178e-16	5.93476	up
comp550542_c0	3.82239e-12	5.54094	up
comp551968_c0	1.48576e-10	5.34129	up
comp556881_c0	4.18411e-05	4.43495	up
comp556991_c0	6.87345e-09	4.44048	up
comp55906_c0	7.46304e-10	5.24648	up
comp561058_c0	5.0282e-13	5.64374	up
comp561874_c0	7.46304e-10	5.24648	up
comp5656_c1	6.81334e-06	4.59745	up
comp572894_c0	3.57416e-07	4.83322	up
comp57414_c0	6.39166e-12	5.51406	up
comp582480_c0	0	6.44224	up
comp588597_c0	1.14907e-06	4.74348	up
comp589633_c0	1.48576e-10	5.34129	up
comp591812_c0	2.53658e-10	5.31037	up
comp593652_c0	6.39671e-07	4.78904	up
comp594320_c0	0.0077188	2.39199	up
comp60110_c0	3.82239e-12	5.54094	up
comp611583_c0	6.37171e-08	4.95815	up
comp614779_c0	1.80272e-11	5.45874	up
comp616964_c0	0	6.32339	up
comp624009_c0	3.57416e-07	4.83322	up
comp629489_c0	4.24311e-11	4.72903	up
comp643487_c0	3.57416e-07	4.83322	up
comp64356_c0	0.00967219	1.25031	up
comp644351_c0	7.46304e-10	5.24648	up
comp644917_c0	5.0282e-13	5.64374	up
comp645062_c0	6.81334e-06	4.59745	up
comp645910_c0	2.59792e-14	5.78538	up
comp645923_c0	0	6.51184	up
comp64702_c0	4.94171e-05	1.71508	up
comp64836_c0	0	6.90233	up
comp649364_c0	3.61155e-08	4.99751	up
comp64991_c0	0.000161121	1.78534	up
comp65010_c0	0.00168788	1.48453	up
comp650763_c0	6.37171e-08	4.95815	up
comp651637_c0	3.74995e-06	4.64778	up
comp66671_c0	0.000240248	1.5808	up
comp66671_c1	0.00198324	1.27362	up
comp66703_c0	0	6.55204	up
comp66804_c0	1.30386e-11	1.73104	up
comp6680_c0	0.000266464	4.2518	up
comp66881_c0	2.81997e-14	1.92186	up
comp67126_c0	1.67652e-05	1.61653	up
comp67447_c0	0	7.90666	up
comp67710_c0	0	10.5517	up
comp680427_c0	3.04079e-11	5.43026	up
comp680846_c0	1.12809e-07	4.9177	up
comp682729_c0	2.29228e-12	5.56734	up
comp683383_c0	0.000266464	4.2518	up
comp685030_c0	2.27576e-05	4.49117	up
comp68520_c1	0.0085122	1.28957	up
comp68625_c0	0.00747086	1.3778	up
comp68742_c0	0.00239963	1.69652	up
comp68756_c0	0	7.17542	up
comp690853_c0	5.14437e-11	5.40121	up
comp692923_c0	6.81334e-06	4.59745	up
comp696676_c0	0.000143167	4.31547	up
comp696866_c0	8.72933e-11	5.37156	up
comp69782_c0	0	6.19386	up
comp700234_c0	1.12809e-07	4.9177	up
comp70754_c0	1.76514e-07	2.51786	up
comp709347_c0	0.000266464	4.2518	up
comp71191_c0	0	6.66634	up
comp71550_c0	1.12809e-07	4.9177	up
comp71575_c0	0	5.81577	up
comp71740_c0	0	6.81692	up
comp71862_c0	0.000140879	1.87361	up
comp71935_c0	0.00156768	2.68975	up
comp71963_c0	0	6.83875	up
comp72245_c0	4.3441e-10	5.27878	up
comp723580_c0	1.28622e-09	5.21343	up
comp723916_c0	6.37171e-08	4.95815	up
comp72711_c0	0	6.45643	up
comp72924_c0	3.04079e-11	5.43026	up
comp730292_c0	2.05418e-08	5.03581	up
comp73045_c0	5.0282e-13	5.64374	up
comp731061_c0	2.07186e-06	4.69642	up
comp73239_c0	0	5.56803	up
comp73353_c0	3.78926e-07	1.84168	up
comp74147_c0	0	6.12445	up
comp74481_c0	6.90559e-14	5.73969	up
comp74785_c0	1.45395e-06	4.0794	up
comp74826_c0	0.0026466	1.2555	up
comp74854_c0	1.17239e-08	5.07313	up
comp74925_c0	4.18411e-05	4.43495	up
comp74925_c1	3.82239e-12	5.54094	up
comp75154_c0	2.07186e-06	4.69642	up
comp75332_c0	0	6.94994	up
comp75399_c0	0.000368094	2.82235	up
comp75482_c0	0	6.38404	up
comp75482_c1	0	7.34519	up
comp76123_c0	7.59649e-05	1.81476	up
comp770663_c0	8.88178e-16	5.93476	up
comp774901_c0	0.000497996	4.18519	up
comp777881_c0	6.81334e-06	4.59745	up
comp77869_c0	2.53658e-10	5.31037	up
comp7802_c0	3.04079e-11	5.43026	up
comp782556_c0	2.07186e-06	4.69642	up
comp78357_c0	0.00202055	1.25598	up
comp78408_c0	0	6.39881	up
comp78737_c0	0	7.04063	up
comp7906_c0	1.24276e-05	4.54529	up
comp79277_c0	4.18411e-05	4.43495	up
comp79463_c0	0	6.35403	up
comp79750_c0	0	6.04611	up
comp80396_c0	0	5.1223	up
comp80590_c0	2.07186e-06	4.69642	up
comp814923_c0	6.39671e-07	4.78904	up
comp81543_c0	6.31717e-14	2.5344	up
comp8193_c0	1.07186e-11	5.48666	up
comp8255_c0	7.7239e-05	4.37645	up
comp82655_c0	3.63678e-08	3.31429	up
comp829498_c0	7.7239e-05	4.37645	up
comp83124_c0	2.45436e-06	1.32768	up
comp83623_c0	3.74995e-06	4.64778	up
comp84006_c0	3.33067e-16	5.97475	up
comp84138_c0	0.00195162	1.54245	up
comp84230_c0	7.7239e-05	4.37645	up
comp84591_c0	2.05418e-08	5.03581	up
comp84666_c0	3.61155e-08	4.99751	up
comp846_c1	0.000497996	4.18519	up
comp848892_c0	2.27576e-05	4.49117	up
comp84944_c0	0.00565065	1.07788	up
comp85158_c0	0.000556235	2.34483	up
comp85466_c0	0	7.67144	up
comp855020_c0	2.53658e-10	5.31037	up
comp856436_c0	3.77476e-15	5.87262	up
comp85643_c0	2.07186e-06	4.69642	up
comp85797_c0	1.1291e-13	5.71629	up
comp85871_c0	5.1958e-07	1.41649	up
comp85907_c0	0.00493472	1.15244	up
comp85976_c0	0	6.23952	up
comp86035_c0	0.000730837	1.86099	up
comp86265_c0	1.60982e-14	5.80769	up
comp866486_c0	0.000143167	4.31547	up
comp86924_c0	0.000951429	2.47956	up
comp87022_c0	0.000143167	4.31547	up
comp87022_c1	2.27576e-05	4.49117	up
comp87259_c0	0.000143167	4.31547	up
comp87326_c0	0.00345148	1.83383	up
comp873953_c0	2.27576e-05	4.49117	up
comp882747_c0	3.04079e-11	5.43026	up
comp88666_c0	3.04079e-11	5.43026	up
comp89420_c0	0.00469094	1.21854	up
comp8951_c0	1.14907e-06	4.74348	up
comp898458_c0	1.1291e-13	5.71629	up
comp909154_c0	4.18411e-05	4.43495	up
comp909840_c0	6.39671e-07	4.78904	up
comp913145_c0	2.07186e-06	4.69642	up
comp92197_c0	8.86322e-05	3.37841	up
comp92649_c0	3.04978e-13	5.66833	up
comp92880_c0	0.000266464	4.2518	up
comp93182_c0	3.74995e-06	4.64778	up
comp931987_c0	6.81334e-06	4.59745	up
comp935766_c0	0.000143167	4.31547	up
comp94030_c0	0	8.3059	up
comp94043_c0	0	8.07247	up
comp94104_c0	0.00463558	1.74575	up
comp94176_c0	2.07186e-06	4.69642	up
comp94527_c0	6.23301e-05	1.60035	up
comp95228_c0	0.000143167	4.31547	up
comp95269_c0	6.81334e-06	4.59745	up
comp95363_c0	0	7.49861	up
comp95460_c2	0	6.96323	up
comp95602_c0	2.8159e-07	3.81454	up
comp95678_c1	0	7.08697	up
comp96359_c0	0	4.16775	up
comp96519_c0	3.61155e-08	4.99751	up
comp97157_c0	1.37867e-12	5.59326	up
comp97215_c0	1.28622e-09	5.21343	up
comp97303_c0	3.77476e-15	5.87262	up
comp97521_c0	0	7.39024	up
comp97718_c0	2.44249e-15	5.89363	up
comp97733_c0	6.71386e-09	5.10951	up
comp978933_c0	4.18411e-05	4.43495	up
comp9842_c0	0.000143167	4.31547	up
comp9844_c0	0	6.29208	up
comp98597_c0	8.88178e-16	5.93476	up
comp98938_c0	0.000123004	1.65092	up
comp99037_c0	3.70218e-08	1.47963	up
comp99092_c0	0.00338006	1.20659	up
comp99336_c1	4.12307e-05	3.80948	up
comp99365_c0	0.00534779	2.74107	up
comp99728_c0	2.07186e-06	4.69642	up
comp100251_c0	8.04901e-07	-4.83684	down
comp10054_c0	1.08263e-07	-4.98777	down
comp100625_c0	1.525e-08	-5.1244	down
comp100636_c0	2.93458e-07	-4.91428	down
comp100645_c1	0.00233518	-4.06686	down
comp100882_c0	8.80214e-05	-4.42536	down
comp101033_c0	3.5043e-11	-5.49585	down
comp101040_c0	3.74055e-06	-4.71228	down
comp101127_c0	1.8345e-05	-2.22377	down
comp101231_c0	5.47369e-05	-2.68543	down
comp101397_c0	2.93458e-07	-4.91428	down
comp101639_c0	0.000772585	-4.19651	down
comp101665_c0	5.15725e-05	-4.47732	down
comp1018413_c0	0.00233518	-4.06686	down
comp101946_c0	0.000446579	-4.25722	down
comp1019480_c0	4.24932e-06	-3.3487	down
comp102105_c0	0.000286779	-2.07871	down
comp102467_c0	2.23458e-06	-4.755	down
comp102467_c2	3.74055e-06	-4.71228	down
comp102680_c0	3.03175e-05	-4.52747	down
comp102765_c1	2.17113e-10	-5.39139	down
comp102812_c0	1.05809e-05	-4.62283	down
comp102909_c0	5.87574e-12	-5.59326	down
comp102955_c0	5.81959e-09	-5.18814	down
comp102955_c1	0.000772585	-4.19651	down
comp103108_c0	0.000772585	-4.19651	down
comp103180_c0	1.05809e-05	-4.62283	down
comp103209_c0	0.000168906	-1.50283	down
comp103369_c0	2.9976e-15	-5.96485	down
comp103420_c0	0.0028247	-3.03416	down
comp103491_c3	3.41949e-14	-5.8513	down
comp103568_c0	8.80214e-05	-4.42536	down
comp103619_c0	0.00123141	-2.54607	down
comp103669_c0	0.000772585	-4.19651	down
comp103774_c0	0	-6.52985	down
comp103820_c1	0	-6.49246	down
comp104204_c0	1.78814e-05	-4.57594	down
comp104265_c0	4.58869e-08	-2.29802	down
comp104417_c0	0.000446579	-4.25722	down
comp104424_c0	1.77984e-07	-4.95149	down
comp104452_c0	0.00134103	-4.13314	down
comp10479_c0	0.000446579	-4.25722	down
comp10524_c0	0.00134103	-4.13314	down
comp105494_c0	5.15725e-05	-4.47732	down
comp105557_c0	2.74122e-05	-2.08844	down
comp105763_c0	0.000259012	-4.31547	down
comp106072_c0	0.00134103	-4.13314	down
comp106072_c1	1.33907e-06	-4.7965	down
comp106077_c0	2.9976e-15	-5.96485	down
comp106078_c0	0.000259012	-4.31547	down
comp106186_c0	1.78814e-05	-4.57594	down
comp106370_c0	6.89697e-05	-3.77328	down
comp106701_c0	0.00047315	-2.33019	down
comp107013_c0	3.74055e-06	-4.71228	down
comp107308_c0	0.00134103	-4.13314	down
comp107314_c0	1.77984e-07	-4.95149	down
comp107479_c0	3.03175e-05	-4.52747	down
comp107596_c0	1.39976e-09	-5.27878	down
comp107760_c1	0	-6.55424	down
comp107932_c0	5.15725e-05	-4.47732	down
comp107_c0	0.00381578	-3.36224	down
comp108014_c0	1.525e-08	-5.1244	down
comp108014_c1	6.28113e-06	-4.66825	down
comp108052_c0	1.02185e-12	-5.6845	down
comp108090_c0	2.93458e-07	-4.91428	down
comp108166_c0	0.00783932	-2.08012	down
comp1081968_c0	5.15725e-05	-4.47732	down
comp1083139_c0	0.00134103	-4.13314	down
comp108507_c0	0.00634538	-3.30154	down
comp108621_c0	0	-6.61349	down
comp108680_c0	9.40785e-09	-5.15662	down
comp1087039_c0	1.05809e-05	-4.62283	down
comp108897_c0	1.08263e-07	-4.98777	down
comp108901_c0	0	-6.45408	down
comp108941_c0	3.03175e-05	-4.52747	down
comp108965_c0	5.45361e-05	-2.35421	down
comp109075_c0	2.93458e-07	-4.91428	down
comp109360_c0	8.80214e-05	-4.42536	down
comp109468_c0	0	-8.10023	down
comp109719_c0	9.40785e-09	-5.15662	down
comp109862_c0	2.24485e-09	-5.2492	down
comp1100387_c0	2.23458e-06	-4.755	down
comp110040_c0	3.74055e-06	-4.71228	down
comp110050_c0	0	-7.28019	down
comp110062_c0	2.30409e-06	-4.05652	down
comp1100749_c0	0.000446579	-4.25722	down
comp110105_c0	8.68018e-11	-5.44457	down
comp110151_c0	2.23456e-11	-5.52083	down
comp1105652_c0	1.33907e-06	-4.7965	down
comp110673_c0	1.77984e-07	-4.95149	down
comp111055_c0	4.85283e-07	-4.87608	down
comp111071_c0	8.04901e-07	-4.83684	down
comp111089_c0	1.78814e-05	-4.57594	down
comp111215_c0	0.000735083	-2.37728	down
comp111257_c1	1.39976e-09	-5.27878	down
comp111270_c0	3.5043e-11	-5.49585	down
comp111298_c1	0.00142716	-1.84508	down
comp111353_c0	1.64113e-08	-1.91492	down
comp111353_c1	0.00724793	-2.68803	down
comp111353_c2	2.9731e-05	-1.45268	down
comp111384_c0	0.000446579	-4.25722	down
comp111386_c0	1.78814e-05	-4.57594	down
comp111414_c0	1.71298e-08	-2.53169	down
comp111735_c0	0.000772585	-4.19651	down
comp111827_c0	5.55112e-16	-6.03588	down
comp1119033_c0	0.000772585	-4.19651	down
comp111948_c0	4.31766e-13	-5.72804	down
comp111978_c0	1.77984e-07	-4.95149	down
comp112018_c0	0.00116627	-1.21158	down
comp112121_c0	5.43037e-08	-4.32402	down
comp112182_c0	6.28113e-06	-4.66825	down
comp1121895_c0	0.00299412	-2.78339	down
comp112271_c0	0	-6.86824	down
comp112415_c0	8.19056e-07	-2.26192	down
comp112424_c0	0	-7.54045	down
comp112653_c0	6.81721e-05	-2.94142	down
comp112739_c0	0.00450479	-1.95002	down
comp112757_c0	5.81959e-09	-5.18814	down
comp112878_c0	0	-7.27286	down
comp112965_c0	0.00193688	-2.21057	down
comp113048_c0	0.00706714	-1.35478	down
comp113071_c0	8.04901e-07	-4.83684	down
comp113077_c0	4.04044e-08	-5.0577	down
comp113107_c0	0	-9.49189	down
comp113115_c0	0.00724793	-2.68803	down
comp113171_c0	0.00772662	-2.25374	down
comp113177_c0	1.33907e-06	-4.7965	down
comp113236_c0	0.00233518	-4.06686	down
comp113317_c0	4.72751e-05	-1.26026	down
comp113476_c0	3.60963e-09	-5.21899	down
comp113517_c0	0.00391207	-2.01638	down
comp113579_c1	0.000150737	-4.37146	down
comp113628_c1	1.77984e-07	-4.95149	down
comp113682_c0	1.39963e-06	-1.76173	down
comp113682_c1	3.6453e-05	-1.77725	down
comp113682_c2	0.000169154	-1.67181	down
comp113853_c0	0	-5.73008	down
comp113857_c0	7.57787e-05	-2.78273	down
comp113881_c0	0.00162598	-1.60704	down
comp113958_c0	6.66134e-15	-5.92799	down
comp113995_c0	0.000431159	-3.22509	down
comp114125_c0	0	-6.12	down
comp114131_c0	2.47882e-08	-5.09143	down
comp114148_c0	6.60445e-08	-5.02316	down
comp114148_c2	3.03175e-05	-4.52747	down
comp114172_c0	0.00120427	-1.59739	down
comp114175_c0	2.46985e-05	-1.59082	down
comp114209_c0	2.43949e-12	-5.6396	down
comp114565_c0	0	-7.13408	down
comp114569_c0	0.000670052	-1.66959	down
comp114574_c0	0	-6.76833	down
comp114615_c0	0.000497831	-1.59091	down
comp114616_c0	3.03175e-05	-4.52747	down
comp114642_c0	1.11022e-16	-5.31991	down
comp114758_c0	2.03103e-09	-1.85702	down
comp114835_c0	0.00515079	-1.77316	down
comp114975_c0	0.000150737	-4.37146	down
comp115016_c1	3.03175e-05	-4.52747	down
comp115071_c0	0.000306108	-3.6325	down
comp115151_c0	5.43037e-08	-4.32402	down
comp115206_c1	0.000446579	-4.25722	down
comp115266_c0	0	-6.71695	down
comp1152_c1	1.05809e-05	-4.62283	down
comp115335_c0	0	-9.0788	down
comp115347_c0	0	-6.36033	down
comp115692_c0	0.00499151	-1.68606	down
comp115819_c0	0	-6.31822	down
comp116118_c0	8.04901e-07	-4.83684	down
comp116216_c0	2.23456e-11	-5.52083	down
comp116494_c0	6.28113e-06	-4.66825	down
comp116511_c0	3.74055e-06	-4.71228	down
comp116616_c0	3.5979e-05	-2.07122	down
comp116624_c0	0	-6.75703	down
comp116702_c0	8.80214e-05	-4.42536	down
comp116728_c0	2.17113e-10	-5.39139	down
comp116764_c0	0.00651384	-2.02962	down
comp116771_c0	1.59872e-14	-2.48456	down
comp116831_c0	8.68018e-11	-5.44457	down
comp116847_c0	6.28113e-06	-4.66825	down
comp116979_c0	0.00193688	-2.21057	down
comp117000_c0	1.25344e-08	-2.47551	down
comp117018_c0	1.37111e-10	-5.41823	down
comp117074_c0	0	-6.15233	down
comp117089_c0	0	-6.36033	down
comp117249_c0	0	-7.17399	down
comp117336_c2	9.91534e-05	-2.25343	down
comp117371_c0	2.47882e-08	-5.09143	down
comp117376_c0	1.9984e-15	-5.98294	down
comp117460_c0	0	-7.10959	down
comp117548_c0	8.75083e-10	-5.30777	down
comp117618_c0	3.22182e-11	-4.05071	down
comp117621_c0	8.12223e-09	-3.75381	down
comp117635_c1	0	-6.41464	down
comp117635_c2	0	-4.05966	down
comp117662_c0	0	-6.13626	down
comp117662_c1	0	-7.45881	down
comp117703_c0	0.000150737	-4.37146	down
comp1177369_c0	1.78814e-05	-4.57594	down
comp117737_c0	6.62361e-08	-1.79314	down
comp117749_c0	0	-7.80728	down
comp117829_c0	5.15725e-05	-4.47732	down
comp117908_c0	0.00299412	-2.78339	down
comp117949_c0	0	-4.19642	down
comp117987_c0	6.60445e-08	-5.02316	down
comp118040_c0	1.83964e-13	-5.77031	down
comp118040_c1	0	-7.9748	down
comp118040_c2	1.525e-08	-5.1244	down
comp118080_c2	0.000372102	-2.65228	down
comp118090_c0	0	-6.91609	down
comp118142_c0	0.00926181	-1.58511	down
comp118173_c0	1.525e-08	-5.1244	down
comp118507_c0	0.0056851	-1.45602	down
comp118526_c0	0	-6.38775	down
comp118576_c0	0	-6.7035	down
comp118619_c0	4.04461e-07	-2.10262	down
comp118671_c1	0.00121175	-1.64508	down
comp118748_c0	0	-7.35153	down
comp118805_c0	0.00174737	-1.12892	down
comp118861_c0	0.00281459	-1.53616	down
comp118948_c0	1.58524e-05	-3.90153	down
comp118969_c0	8.77932e-05	-1.39197	down
comp119011_c0	0	-6.12	down
comp119023_c0	0	-7.21282	down
comp119089_c0	0	-7.60026	down
comp119121_c0	0	-7.91953	down
comp119237_c0	0.000835384	-3.53039	down
comp119330_c0	3.78164e-12	-5.61661	down
comp119376_c0	0.0079605	-1.07159	down
comp119545_c0	1.33907e-06	-4.7965	down
comp119634_c0	2.9976e-15	-5.96485	down
comp119645_c0	0	-6.24517	down
comp119648_c1	0.00957461	-1.45565	down
comp119658_c0	0	-7.17399	down
comp119685_c0	0	-5.12296	down
comp119730_c0	1.05809e-05	-4.62283	down
comp119832_c1	0	-6.24517	down
comp119847_c0	0.000996745	-1.76134	down
comp119937_c0	0.00123566	-2.87283	down
comp119958_c0	2.9976e-15	-5.96485	down
comp119971_c0	3.44649e-10	-5.36405	down
comp119991_c0	8.08664e-08	-2.75605	down
comp120000_c0	1.46466e-08	-2.50233	down
comp120013_c0	1.51858e-06	-1.74402	down
comp120013_c1	0.00085188	-1.24757	down
comp120047_c0	0	-6.44105	down
comp120056_c1	0	-6.56629	down
comp120134_c0	3.54465e-06	-2.07227	down
comp120214_c0	0.000201699	-1.63654	down
comp120284_c0	0	-6.89714	down
comp120284_c1	4.85283e-07	-4.87608	down
comp120310_c0	2.30409e-06	-4.05652	down
comp12044_c0	3.74055e-06	-4.71228	down
comp120497_c0	3.96244e-07	-1.82145	down
comp120571_c0	5.0086e-07	-2.22945	down
comp120591_c0	0.00673307	-1.4559	down
comp120632_c1	0.00783932	-2.08012	down
comp120685_c0	2.17686e-07	-4.22942	down
comp120741_c0	0	-3.83064	down
comp120748_c0	0	-6.73586	down
comp120809_c0	0.00559885	-1.73365	down
comp120834_c0	0.000332436	-2.35861	down
comp120841_c0	2.45148e-12	-4.89601	down
comp120873_c0	5.53825e-09	-2.32758	down
comp120879_c0	0.000835384	-3.53039	down
comp120886_c0	1.04461e-05	-2.05997	down
comp120947_c0	0.00898802	-2.34959	down
comp120979_c1	0.00651384	-2.02962	down
comp121359_c0	0	-7.17399	down
comp121386_c0	2.44809e-07	-1.5974	down
comp121426_c0	0.00651384	-2.02962	down
comp121444_c0	0	-6.2301	down
comp121448_c0	0.00110157	-3.13278	down
comp121555_c0	0.00328379	-1.06941	down
comp121641_c0	1.92517e-06	-1.41366	down
comp121694_c2	0.00553676	-1.54799	down
comp121729_c0	0	-7.8022	down
comp121743_c0	0.00280755	-1.12873	down
comp121883_c0	5.15725e-05	-4.47732	down
comp121909_c0	0.000343999	-2.02382	down
comp121923_c0	4.29622e-08	-3.04044	down
comp121939_c0	0	-7.63499	down
comp122017_c0	1.36859e-09	-3.04122	down
comp122112_c0	0.00603487	-1.69756	down
comp122134_c0	0.000737239	-1.44693	down
comp122221_c0	5.81959e-09	-5.18814	down
comp122250_c0	8.73494e-09	-2.87386	down
comp122346_c0	0.000331467	-1.15926	down
comp122644_c1	4.76317e-07	-1.46275	down
comp122697_c0	0.00106027	-2.34576	down
comp122744_c0	0.00398512	-1.15908	down
comp122763_c0	0	-4.11461	down
comp122812_c0	0	-7.09304	down
comp122869_c0	3.40265e-08	-1.87216	down
comp122873_c0	0	-6.08555	down
comp122873_c1	5.15725e-05	-4.47732	down
comp122897_c0	0.00606269	-1.42686	down
comp122955_c0	5.46785e-13	-4.53978	down
comp122962_c0	0.000328673	-2.99739	down
comp122965_c0	1.29363e-06	-1.5474	down
comp122998_c0	4.85283e-07	-4.87608	down
comp123098_c0	0	-6.15233	down
comp123102_c0	0.00187894	-1.82347	down
comp123306_c0	0	-7.10959	down
comp123306_c1	3.81933e-06	-1.57346	down
comp123326_c0	1.33983e-06	-1.47013	down
comp123460_c0	1.11022e-16	-3.11358	down
comp123464_c1	1.28878e-05	-1.88206	down
comp123509_c0	0	-8.19249	down
comp123523_c0	0.000390038	-1.72371	down
comp123584_c1	3.02534e-08	-3.06	down
comp123690_c0	2.74101e-08	-1.81723	down
comp123773_c0	0.000826267	-2.58235	down
comp123775_c1	0.000372102	-2.65228	down
comp1237888_c0	0.00233518	-4.06686	down
comp123797_c0	1.1913e-11	-1.79976	down
comp123877_c0	5.10157e-10	-2.22161	down
comp123899_c0	0.0022965	-3.4205	down
comp123943_c1	0.00193688	-2.21057	down
comp123945_c0	0.00169235	-2.40082	down
comp124050_c0	2.71289e-07	-1.88731	down
comp124060_c0	8.13408e-05	-2.01828	down
comp124073_c0	4.42687e-05	-1.32893	down
comp124088_c0	0	-6.55424	down
comp124161_c0	0	-5.27121	down
comp124304_c0	0.00247022	-1.06427	down
comp124356_c0	0.00603487	-1.69756	down
comp124422_c0	0	-6.87794	down
comp124508_c1	4.04532e-06	-1.78279	down
comp124540_c0	0.000265406	-1.60813	down
comp124721_c1	0.000671386	-1.76664	down
comp124740_c0	1.69062e-05	-1.29394	down
comp124747_c0	1.45432e-08	-1.71088	down
comp124750_c1	7.53481e-05	-1.72103	down
comp124800_c0	1.06782e-06	-2.18891	down
comp124868_c0	0.00529959	-1.12532	down
comp124908_c0	0.00106027	-2.34576	down
comp124921_c0	5.98585e-09	-1.56679	down
comp124966_c0	8.86804e-06	-2.12625	down
comp125052_c0	0	-6.47978	down
comp125060_c0	0.00294393	-1.82026	down
comp125111_c0	3.24391e-08	-2.46325	down
comp125117_c0	0	-6.74648	down
comp125224_c0	1.96961e-05	-3.03814	down
comp125226_c0	7.88207e-08	-2.6361	down
comp125238_c0	0.000223224	-1.34469	down
comp125405_c1	0.00445054	-2.56227	down
comp125421_c0	0.00272248	-1.07637	down
comp125467_c1	0.00656441	-1.21781	down
comp125494_c0	0.001249	-1.40634	down
comp125498_c0	0.00795131	-1.14239	down
comp125502_c0	0.00568073	-1.62618	down
comp125537_c1	0.00214622	-1.12098	down
comp125719_c0	3.33067e-16	-2.44735	down
comp125849_c1	4.88498e-15	-4.2241	down
comp125866_c0	2.11087e-07	-1.78705	down
comp126033_c0	0.000664073	-1.17282	down
comp126093_c1	0.00902207	-1.04079	down
comp126126_c0	1.55431e-15	-2.24502	down
comp126181_c0	0.00210118	-1.28535	down
comp126223_c0	0.00017263	-2.03512	down
comp126235_c0	0.000410662	-1.20642	down
comp126271_c0	0.00799674	-1.55539	down
comp126372_c0	0	-6.55424	down
comp126373_c0	2.38974e-06	-2.30721	down
comp126510_c1	5.92788e-05	-2.14708	down
comp126625_c0	0	-7.15816	down
comp126790_c0	1.11022e-16	-3.02972	down
comp126874_c0	1.46141e-06	-1.69304	down
comp126980_c0	0	-6.47978	down
comp126991_c2	0.00206802	-1.40143	down
comp127028_c1	2.16107e-05	-1.75621	down
comp127047_c0	0.000178261	-1.42842	down
comp127120_c0	0.000161234	-1.17599	down
comp127215_c1	0.000282462	-1.80453	down
comp127232_c0	0.000891315	-1.45702	down
comp127232_c2	2.85139e-09	-1.99321	down
comp127283_c4	9.24432e-05	-1.55026	down
comp127283_c7	3.71885e-06	-4.0193	down
comp127344_c0	0.000194314	-1.46597	down
comp127419_c0	0.00135825	-1.7895	down
comp127430_c0	0.00323786	-1.48579	down
comp127475_c0	5.57221e-13	-1.87984	down
comp127516_c0	0.00169235	-2.40082	down
comp127562_c1	6.74431e-05	-2.06358	down
comp127580_c4	1.15595e-08	-1.58265	down
comp127588_c0	0.000885276	-1.51998	down
comp127604_c0	1.78217e-10	-1.98535	down
comp127758_c0	0	-6.60209	down
comp127758_c1	0	-4.59906	down
comp127851_c0	0	-7.79197	down
comp127900_c0	0.000172107	-2.16207	down
comp128022_c0	0.000575706	-1.15005	down
comp128026_c2	0.00149019	-1.58232	down
comp128027_c0	0.00116255	-1.12879	down
comp128054_c0	0.00306006	-1.1389	down
comp128129_c0	0.000106599	-3.35334	down
comp128241_c0	0.000552666	-1.2078	down
comp128253_c1	3.17024e-05	-1.94461	down
comp128282_c0	0.000140662	-1.45025	down
comp128286_c8	3.23695e-08	-3.30102	down
comp128317_c0	0.000237747	-2.83776	down
comp128321_c0	0.00687041	-1.2455	down
comp128338_c0	5.57387e-06	-1.52603	down
comp128456_c0	0.000102087	-1.71599	down
comp128506_c0	0.00157132	-1.1409	down
comp128536_c0	4.51243e-05	-1.5972	down
comp128574_c0	0.00123566	-2.87283	down
comp128640_c0	1.67372e-08	-2.1245	down
comp128713_c0	8.10355e-05	-2.46699	down
comp128715_c2	8.15989e-05	-2.55319	down
comp128803_c0	0.00616259	-1.14334	down
comp128808_c1	0.000136479	-2.23044	down
comp128814_c0	8.73119e-09	-2.6049	down
comp128881_c2	0.00370521	-1.15985	down
comp128889_c2	0.000271176	-1.96834	down
comp129023_c0	0.00452625	-2.98221	down
comp129042_c2	0.00465658	-2.06114	down
comp129092_c0	0.00211315	-1.14321	down
comp129148_c1	0.000489659	-1.70832	down
comp129148_c2	1.44201e-05	-2.33132	down
comp129163_c0	1.12952e-05	-1.44154	down
comp1292273_c0	8.80214e-05	-4.42536	down
comp129355_c1	3.44202e-09	-2.474	down
comp129390_c0	0.00169235	-2.40082	down
comp129438_c0	1.2371e-08	-1.98259	down
comp129451_c2	1.60193e-08	-2.22046	down
comp129454_c2	0.000746211	-1.30693	down
comp129494_c0	7.79066e-09	-1.55823	down
comp129573_c1	0.000865598	-1.30763	down
comp129576_c0	1.01641e-05	-1.42775	down
comp129796_c1	0.00452218	-1.01907	down
comp129814_c2	0.00926056	-1.02528	down
comp129837_c0	0.00465658	-2.06114	down
comp129877_c0	0.00801035	-1.45578	down
comp129882_c0	2.44249e-15	-3.18488	down
comp129905_c1	0.00126377	-1.88814	down
comp129951_c0	0.00413069	-1.34628	down
comp129988_c0	0.000299078	-1.45747	down
comp130108_c0	0.00229146	-1.74901	down
comp130114_c1	0.0042825	-1.19909	down
comp130120_c0	1.4719e-09	-2.48405	down
comp130120_c1	0.00529456	-2.29194	down
comp130120_c4	0.000175338	-1.75861	down
comp130160_c0	0.00427725	-1.1186	down
comp130276_c0	8.04901e-07	-4.83684	down
comp130360_c0	1.3018e-07	-2.35928	down
comp130406_c0	0.000446689	-1.17304	down
comp130515_c0	0.00687041	-1.2455	down
comp130515_c4	4.43667e-08	-1.90545	down
comp130539_c2	0.000715176	-1.47912	down
comp130633_c0	8.62309e-06	-1.30722	down
comp130809_c0	0.0035654	-1.16799	down
comp130845_c0	4.86694e-05	-1.5604	down
comp130861_c0	1.32329e-06	-2.38272	down
comp130875_c0	0.00632897	-1.57468	down
comp130928_c1	2.17609e-08	-4.3838	down
comp130997_c1	0.0095291	-1.1998	down
comp131017_c0	0.00141856	-1.31012	down
comp131023_c2	0.00151836	-1.06408	down
comp131066_c1	2.20346e-06	-1.89095	down
comp131122_c0	0.000115306	-2.44065	down
comp131250_c1	2.23056e-05	-1.26165	down
comp131250_c4	9.90874e-13	-2.00832	down
comp131286_c0	0.00332091	-1.60649	down
comp131317_c0	0.000232059	-1.66503	down
comp131381_c0	6.87206e-06	-1.30357	down
comp131430_c1	0.0010205	-1.42621	down
comp131446_c0	0.00311828	-1.63107	down
comp131503_c0	0.00181615	-1.17108	down
comp131573_c1	0.00506293	-1.05159	down
comp131575_c4	3.37685e-05	-1.30307	down
comp131600_c0	0.00231696	-1.21194	down
comp131606_c1	0.00260114	-1.23698	down
comp131610_c0	0.000244794	-2.46792	down
comp131637_c0	2.64455e-12	-2.42393	down
comp131640_c1	0.00304179	-1.20229	down
comp131650_c0	7.15701e-05	-1.54528	down
comp131651_c0	9.92086e-11	-2.21164	down
comp131817_c0	0.000126193	-1.95883	down
comp131828_c0	7.15191e-05	-1.25902	down
comp131886_c0	0	-5.81939	down
comp131890_c0	0.00121927	-1.25072	down
comp132160_c0	0.00159505	-1.14766	down
comp132232_c1	1.82331e-08	-2.90887	down
comp132321_c0	0.000249387	-1.50638	down
comp132419_c3	8.62755e-06	-1.38888	down
comp132421_c0	2.01483e-05	-1.38507	down
comp132488_c0	5.64881e-13	-2.56623	down
comp132490_c0	0.00418701	-1.01277	down
comp132526_c0	0.0022429	-1.18156	down
comp132554_c0	0.00741926	-1.11037	down
comp132660_c0	0.00118243	-1.15357	down
comp1327_c0	0.000446579	-4.25722	down
comp1327_c1	0.00134103	-4.13314	down
comp132870_c0	0.00231695	-1.30952	down
comp132926_c0	1.2905e-05	-1.45378	down
comp132932_c0	0.000115482	-1.28888	down
comp133038_c0	0.0022278	-1.04532	down
comp133084_c0	0.00680766	-1.06925	down
comp133103_c0	6.26373e-05	-1.40448	down
comp133152_c0	0.0073583	-1.41195	down
comp133186_c0	0.00206753	-1.31219	down
comp133217_c0	0.00122095	-1.22106	down
comp133325_c0	0.00113445	-1.3366	down
comp133467_c0	0	-5.42604	down
comp133472_c1	0.00591581	-1.21715	down
comp133473_c0	0.0062741	-1.02224	down
comp133484_c0	1.0345e-07	-2.19034	down
comp133547_c0	0.00158086	-1.25609	down
comp133594_c0	0	-10.673	down
comp133650_c0	0.000284794	-1.65201	down
comp133687_c0	0.000131476	-1.1779	down
comp133849_c0	0.00386287	-1.08847	down
comp133861_c0	4.88182e-06	-2.66202	down
comp133917_c0	0.00202687	-1.59097	down
comp134005_c0	0.00641828	-1.40052	down
comp134028_c0	0.000468585	-1.81561	down
comp134060_c0	0.000506956	-1.20335	down
comp134143_c0	0.000157355	-1.23786	down
comp134219_c0	5.69375e-06	-1.79511	down
comp134286_c1	1.23684e-05	-1.63304	down
comp134299_c0	0.000789068	-1.16429	down
comp134420_c0	0.00113049	-1.2086	down
comp134449_c3	3.40162e-09	-2.92155	down
comp134542_c0	6.81721e-05	-2.94142	down
comp134557_c2	0.000711278	-1.86682	down
comp134591_c1	1.63518e-05	-1.34819	down
comp134674_c0	1.41562e-06	-1.5737	down
comp134740_c1	1.77304e-06	-1.35821	down
comp134882_c0	0.000497256	-1.19419	down
comp134888_c0	0.00233518	-4.06686	down
comp134927_c0	2.45931e-05	-2.20498	down
comp134940_c0	0.000835384	-3.53039	down
comp134993_c1	2.413e-05	-1.80104	down
comp135024_c0	4.85771e-06	-1.39104	down
comp135035_c0	0.000122983	-1.65534	down
comp135056_c0	1.54105e-10	-3.07	down
comp135065_c0	5.3447e-06	-1.32359	down
comp135066_c0	2.77468e-05	-1.52008	down
comp135102_c1	0.0023993	-1.20518	down
comp135136_c0	8.87913e-06	-1.99766	down
comp135151_c0	6.27583e-10	-1.63948	down
comp135158_c0	0.00450479	-1.95002	down
comp135175_c0	0.00195104	-1.05148	down
comp135235_c1	4.70357e-12	-1.97191	down
comp135322_c1	2.64233e-14	-2.44255	down
comp135344_c0	0.000179427	-1.49322	down
comp135647_c2	1.23706e-07	-2.98012	down
comp135711_c0	0	-5.05214	down
comp135731_c3	0.00110115	-2.02067	down
comp135769_c0	0.000239774	-1.34332	down
comp135781_c1	1.80882e-06	-2.2181	down
comp135886_c0	0.00030282	-1.14066	down
comp136084_c0	0.000126193	-1.25623	down
comp136188_c0	1.12475e-06	-1.49692	down
comp136300_c0	0.00166152	-1.16973	down
comp136348_c1	0.00439362	-1.08796	down
comp136492_c0	0.000523251	-2.03381	down
comp136539_c1	0.00372777	-1.23697	down
comp1366252_c0	0.000150737	-4.37146	down
comp136710_c0	6.55476e-13	-2.22672	down
comp136715_c0	0.00730932	-1.0944	down
comp136829_c1	0.00393629	-1.17882	down
comp136910_c0	0.00177198	-1.44474	down
comp136927_c2	0.00803983	-1.10859	down
comp136950_c0	8.62195e-07	-1.723	down
comp137024_c1	0.000321517	-1.59609	down
comp137236_c0	0.00941666	-2.14063	down
comp137254_c0	0.00285129	-1.03957	down
comp137316_c0	0.00600011	-1.0743	down
comp137316_c1	4.38917e-05	-1.37611	down
comp137320_c3	2.15425e-09	-1.87711	down
comp137373_c2	0.00124136	-1.46873	down
comp137511_c1	0.00753636	-1.07076	down
comp137599_c3	4.0609e-06	-1.54916	down
comp137607_c1	0.000137743	-1.39597	down
comp137664_c0	0.00184832	-1.33931	down
comp137728_c1	0.000366247	-1.14389	down
comp137771_c0	8.10355e-05	-2.46699	down
comp1380339_c0	0.00233518	-4.06686	down
comp138184_c0	0.00676303	-1.16892	down
comp138222_c1	6.18792e-07	-1.79353	down
comp138264_c0	9.82067e-06	-1.40243	down
comp138267_c1	0.000247425	-1.36387	down
comp1382_c1	0.000259012	-4.31547	down
comp138521_c0	0.00763807	-1.04602	down
comp138592_c0	6.23104e-05	-1.57931	down
comp138671_c0	0.00149681	-1.36388	down
comp138679_c0	8.10175e-11	-1.9761	down
comp138861_c0	0.000648295	-1.22952	down
comp138867_c0	0.00577117	-1.19135	down
comp138881_c0	3.73235e-11	-3.00488	down
comp139133_c1	3.41517e-05	-1.23977	down
comp139193_c1	4.21528e-05	-3.8173	down
comp139281_c1	1.73009e-08	-1.75429	down
comp139349_c1	0.000925659	-1.08799	down
comp139404_c0	2.30309e-09	-1.59453	down
comp139418_c0	1.65854e-06	-1.40157	down
comp139433_c1	0.00413069	-1.34628	down
comp139463_c0	0.00273142	-1.03508	down
comp139794_c0	0.00357741	-1.03252	down
comp139809_c0	0.000133858	-1.31819	down
comp139860_c1	0.000844984	-1.60748	down
comp139880_c0	0.000472433	-1.92841	down
comp139893_c0	0.000171315	-1.20375	down
comp139950_c1	0.00262975	-1.13152	down
comp140095_c0	0.00179043	-1.69474	down
comp140191_c0	0.00132344	-1.15636	down
comp140207_c1	6.1838e-11	-3.11171	down
comp140218_c0	2.76317e-05	-1.31969	down
comp140333_c0	0.00281946	-1.04103	down
comp140345_c0	0.00132344	-1.15636	down
comp140448_c1	0.00551913	-1.24228	down
comp140482_c1	2.93995e-05	-1.53925	down
comp140514_c0	0.00778006	-1.02847	down
comp140648_c0	0.00563434	-1.19932	down
comp140659_c0	0.000203767	-1.16044	down
comp140673_c0	7.18986e-06	-1.68754	down
comp140743_c0	3.96984e-08	-1.82394	down
comp140753_c1	0.000988361	-1.15613	down
comp140786_c0	0.000332595	-1.32527	down
comp140843_c0	0.00691513	-1.00744	down
comp140879_c0	8.24513e-05	-1.39273	down
comp140913_c0	4.22954e-06	-1.38124	down
comp140917_c0	0.00431949	-1.14144	down
comp140927_c0	1.58524e-05	-3.90153	down
comp140952_c0	0.00109755	-1.1934	down
comp140984_c0	0.00975319	-1.01519	down
comp141087_c0	0.00251804	-1.09215	down
comp141247_c1	2.14065e-07	-1.85722	down
comp141279_c0	7.20374e-05	-2.27605	down
comp141307_c0	0.00783932	-2.08012	down
comp141335_c1	0.000330284	-1.14701	down
comp141395_c0	0.00330382	-1.05102	down
comp141536_c0	0.00125635	-1.27001	down
comp141573_c0	0.00335534	-1.03149	down
comp141581_c1	0.00259725	-1.45649	down
comp141620_c0	0.0062817	-1.07516	down
comp141621_c0	0.000236604	-1.15825	down
comp141661_c0	1.28105e-07	-1.59159	down
comp141685_c3	0.000768954	-1.30214	down
comp141733_c2	0.00724793	-2.68803	down
comp141738_c0	0.00402069	-1.13046	down
comp141760_c0	0.00406488	-1.04164	down
comp141782_c0	1.83061e-06	-1.40651	down
comp141795_c0	7.96722e-05	-1.93481	down
comp141817_c1	2.31738e-06	-1.37098	down
comp141853_c0	0.00537382	-1.00319	down
comp141985_c0	0.0052809	-1.16461	down
comp142142_c0	0.00315392	-1.0432	down
comp142158_c0	0.00645131	-1.06984	down
comp142162_c0	0.00153727	-1.20399	down
comp142223_c0	2.16001e-07	-2.8539	down
comp142259_c0	0.00528044	-1.00092	down
comp142274_c0	0.0079068	-1.23553	down
comp142420_c0	2.45592e-06	-1.3749	down
comp142547_c0	0.00599518	-1.00077	down
comp142549_c2	0.00328823	-1.97789	down
comp142556_c1	0.00870339	-1.24919	down
comp142581_c1	0.00294867	-1.03674	down
comp142590_c0	0.00494638	-1.00988	down
comp142592_c0	1.61337e-08	-1.64173	down
comp142598_c1	1.20534e-05	-1.86987	down
comp142617_c0	0.00924508	-1.01798	down
comp142652_c0	0.000436857	-1.12992	down
comp142751_c0	0.00102305	-1.14492	down
comp142760_c0	1.75793e-07	-1.50408	down
comp142768_c0	6.40935e-09	-2.28049	down
comp142784_c1	0.000418874	-1.12794	down
comp142800_c0	0.00614509	-1.24384	down
comp142821_c0	0.000203672	-1.15959	down
comp142828_c0	0.000677149	-1.11957	down
comp142829_c0	0.000168173	-1.17481	down
comp142854_c5	0.000623257	-1.90803	down
comp142887_c0	0.00977252	-1.06656	down
comp142902_c0	0.00301405	-1.45641	down
comp142902_c2	0.000180934	-1.17193	down
comp142922_c0	0.000212196	-1.1585	down
comp142927_c0	0.00134072	-1.12204	down
comp142929_c0	0.000608638	-1.3158	down
comp142931_c0	0.00109498	-1.09211	down
comp142931_c1	2.79728e-05	-1.2726	down
comp142932_c0	4.30367e-05	-1.36764	down
comp142933_c0	0.00347365	-1.07541	down
comp1432092_c0	0.000259012	-4.31547	down
comp1440_c0	0.00605193	-2.39109	down
comp1450628_c0	1.05809e-05	-4.62283	down
comp14892_c0	0.00134103	-4.13314	down
comp152154_c0	1.27122e-06	-1.67994	down
comp1524223_c0	0.00233518	-4.06686	down
comp1572453_c0	0.000446579	-4.25722	down
comp1577674_c0	0.00233518	-4.06686	down
comp1592165_c0	0.000772585	-4.19651	down
comp1628324_c0	0.000772585	-4.19651	down
comp16393_c0	0.000772585	-4.19651	down
comp16582_c0	8.80214e-05	-4.42536	down
comp167769_c0	0	-7.52696	down
comp16850_c0	0.00134103	-4.13314	down
comp16978_c0	0.000259012	-4.31547	down
comp17184_c0	9.91534e-05	-2.25343	down
comp1849318_c0	0.000772585	-4.19651	down
comp1849_c0	3.03175e-05	-4.52747	down
comp18733_c0	0.00233518	-4.06686	down
comp20023_c0	0.000772585	-4.19651	down
comp20266_c0	2.23458e-06	-4.755	down
comp214908_c0	0.00725127	-2.92831	down
comp21534_c0	3.03175e-05	-4.52747	down
comp23541_c0	0.000538675	-2.50206	down
comp24275_c0	4.85283e-07	-4.87608	down
comp27495_c0	2.23458e-06	-4.755	down
comp2778_c0	5.4848e-10	-5.33619	down
comp30400_c0	0.00134103	-4.13314	down
comp31746_c0	0.000772585	-4.19651	down
comp34286_c0	3.03175e-05	-4.52747	down
comp363_c0	8.80214e-05	-4.42536	down
comp36592_c0	0.000150737	-4.37146	down
comp36866_c0	0.00134103	-4.13314	down
comp38572_c0	1.78814e-05	-4.57594	down
comp40001_c0	2.24485e-09	-5.2492	down
comp40409_c0	0.000259012	-4.31547	down
comp43475_c1	5.15725e-05	-4.47732	down
comp438526_c0	5.55112e-16	-6.03588	down
comp46186_c0	3.03175e-05	-4.52747	down
comp4793_c0	0.00725127	-2.92831	down
comp50155_c0	0.000150737	-4.37146	down
comp506136_c0	0.000446579	-4.25722	down
comp521961_c0	1.77984e-07	-4.95149	down
comp524694_c0	8.04901e-07	-4.83684	down
comp53239_c0	0.00134103	-4.13314	down
comp559_c0	6.28113e-06	-4.66825	down
comp56867_c0	0.000772585	-4.19651	down
comp56972_c0	1.05809e-05	-4.62283	down
comp5703_c0	5.15725e-05	-4.47732	down
comp57207_c0	1.05809e-05	-4.62283	down
comp57994_c0	0.000772585	-4.19651	down
comp5824_c0	5.15725e-05	-4.47732	down
comp5839_c0	3.03175e-05	-4.52747	down
comp584470_c0	2.23456e-11	-5.52083	down
comp59183_c0	2.81664e-13	-5.74933	down
comp60459_c0	4.85283e-07	-4.87608	down
comp62159_c0	1.83964e-13	-5.77031	down
comp622456_c0	1.05809e-05	-4.62283	down
comp64146_c0	0.00422719	-1.86465	down
comp646432_c0	8.80214e-05	-4.42536	down
comp657697_c0	0.000548506	-2.76427	down
comp66115_c0	0.0022965	-3.4205	down
comp66538_c0	4.3202e-06	-3.61454	down
comp6661_c0	6.28113e-06	-4.66825	down
comp67768_c0	9.40785e-09	-5.15662	down
comp68274_c0	3.23533e-07	-2.09511	down
comp69409_c0	0.00138395	-3.47649	down
comp71497_c0	0.000826168	-1.95801	down
comp71574_c0	0.00406916	-2.43142	down
comp71787_c0	1.42826e-11	-5.54538	down
comp72799_c0	1.36727e-07	-4.26165	down
comp7319_c0	0.000772585	-4.19651	down
comp734230_c0	2.23458e-06	-4.755	down
comp75398_c0	0.00233518	-4.06686	down
comp75401_c0	8.80861e-05	-3.11204	down
comp75645_c0	0.00126742	-2.68683	down
comp771822_c0	6.60445e-08	-5.02316	down
comp78180_c0	0.00176337	-3.08432	down
comp78281_c1	1.33907e-06	-4.7965	down
comp78436_c0	6.6358e-13	-5.70643	down
comp78718_c0	1.78814e-05	-4.57594	down
comp787313_c0	2.24485e-09	-5.2492	down
comp787_c0	1.77984e-07	-4.95149	down
comp79154_c0	8.80214e-05	-4.42536	down
comp79250_c0	9.75455e-06	-3.94186	down
comp79534_c0	0.00233518	-4.06686	down
comp79544_c0	6.28113e-06	-4.66825	down
comp80069_c0	1.78814e-05	-4.57594	down
comp80875_c0	6.60445e-08	-5.02316	down
comp8117_c0	2.47882e-08	-5.09143	down
comp81192_c0	0	-6.24517	down
comp81231_c0	8.60707e-08	-4.29317	down
comp81447_c1	0.00151077	-1.22652	down
comp81861_c0	3.74055e-06	-4.71228	down
comp82571_c0	1.05809e-05	-4.62283	down
comp82780_c0	8.04901e-07	-4.83684	down
comp82911_c0	0.00233518	-4.06686	down
comp83389_c0	2.93458e-07	-4.91428	down
comp83426_c0	0.00985917	-1.06359	down
comp83441_c0	0.00390548	-2.14682	down
comp83755_c0	5.50859e-11	-5.47044	down
comp83957_c0	6.28113e-06	-4.66825	down
comp840427_c0	3.74055e-06	-4.71228	down
comp84624_c0	0.000259012	-4.31547	down
comp847376_c0	0.000150737	-4.37146	down
comp84803_c0	5.87574e-12	-5.59326	down
comp84813_c0	4.04044e-08	-5.0577	down
comp85110_c0	0.00079417	-2.91556	down
comp85652_c0	0.00233518	-4.06686	down
comp85652_c1	0.00134103	-4.13314	down
comp85776_c0	0.001286	-1.96372	down
comp85940_c0	1.39976e-09	-5.27878	down
comp86031_c0	4.04044e-08	-5.0577	down
comp86276_c0	0.00233518	-4.06686	down
comp86439_c0	5.87574e-12	-5.59326	down
comp86439_c1	0.00233518	-4.06686	down
comp86442_c0	3.33067e-16	-6.0531	down
comp8660_c0	5.15725e-05	-4.47732	down
comp86660_c0	1.5099e-14	-5.89015	down
comp86744_c0	6.28113e-06	-4.66825	down
comp87097_c0	2.07612e-14	-2.58157	down
comp87122_c0	0.00134103	-4.13314	down
comp87177_c0	2.93458e-07	-4.91428	down
comp87488_c0	3.78164e-12	-5.61661	down
comp88043_c0	1.08263e-07	-4.98777	down
comp88511_c0	0.00134103	-4.13314	down
comp88565_c0	3.60963e-09	-5.21899	down
comp88736_c0	2.17113e-10	-5.39139	down
comp89259_c0	5.81959e-09	-5.18814	down
comp89521_c0	0.00138395	-3.47649	down
comp89582_c0	0.00134103	-4.13314	down
comp90035_c1	0.000772585	-4.19651	down
comp90132_c0	5.15725e-05	-4.47732	down
comp904846_c0	5.15725e-05	-4.47732	down
comp90634_c0	0	-6.2301	down
comp90920_c0	2.23458e-06	-4.755	down
comp91627_c0	2.23458e-06	-4.755	down
comp91716_c0	0.000446579	-4.25722	down
comp92052_c0	2.38419e-05	-3.21825	down
comp92418_c0	6.71012e-05	-3.39368	down
comp926933_c0	2.93458e-07	-4.91428	down
comp93396_c0	0.000772585	-4.19651	down
comp93531_c0	0.000772585	-4.19651	down
comp94830_c0	0	-3.88027	down
comp95341_c0	0.000259012	-4.31547	down
comp95349_c0	1.77984e-07	-4.95149	down
comp95381_c0	2.24485e-09	-5.2492	down
comp95667_c0	0	-8.92826	down
comp96073_c0	0.000446579	-4.25722	down
comp96097_c0	0.000772585	-4.19651	down
comp96694_c0	0.000319849	-2.11646	down
comp96842_c0	0.000259012	-4.31547	down
comp96950_c0	0	-6.28944	down
comp97250_c0	3.04581e-07	-2.8338	down
comp97288_c0	0.00162598	-1.60704	down
comp97653_c0	3.44351e-06	-2.68465	down
comp981440_c0	0.000772585	-4.19651	down
comp98307_c0	0.00724793	-2.68803	down
comp98323_c0	0.00233518	-4.06686	down
comp98323_c1	0.000150737	-4.37146	down
comp985077_c0	0.00134103	-4.13314	down
comp98955_c0	3.03175e-05	-4.52747	down
comp99071_c0	3.60963e-09	-5.21899	down
comp99140_c0	0	-4.20522	down
comp99258_c0	0.00466007	-2.73649	down
comp993054_c0	1.33907e-06	-4.7965	down
comp99388_c0	3.03175e-05	-4.52747	down
comp99622_c0	1.36727e-07	-4.26165	down

## Sheet: ME15 vs. ME6
#ID	FDR	log2FC	regulated
comp100637_c0	0.000644652	1.36634	up
comp100887_c1	0.00699713	2.28811	up
comp101533_c0	2.85295e-05	1.80731	up
comp101771_c0	6.65027e-06	1.50596	up
comp101817_c0	1.50218e-10	1.81439	up
comp102727_c0	0.000326917	2.35867	up
comp102727_c1	0.000346175	1.56834	up
comp103714_c0	5.48922e-07	1.7283	up
comp103979_c0	5.61764e-05	4.48742	up
comp104265_c0	0.00140275	1.66056	up
comp105708_c0	0.000103825	1.93394	up
comp106370_c0	1.36671e-06	4.09866	up
comp106711_c0	0.00162068	1.27295	up
comp107005_c0	2.20669e-05	1.49184	up
comp108266_c2	0.000601857	1.53594	up
comp108507_c0	0.00371222	3.40543	up
comp108843_c0	4.23288e-06	4.70919	up
comp108856_c0	0.00478009	2.14226	up
comp108958_c0	9.02267e-05	1.19767	up
comp108979_c0	0.00995226	1.27601	up
comp110787_c0	2.03422e-10	3.37382	up
comp111233_c0	0.000139896	1.76021	up
comp111561_c0	0	6.80584	up
comp111575_c0	4.21362e-11	1.3847	up
comp111895_c0	1.49713e-10	1.93802	up
comp111975_c0	0.000126368	1.3768	up
comp113227_c2	0.00154018	1.40642	up
comp113760_c1	4.01778e-05	2.18666	up
comp113881_c0	3.75106e-08	2.11902	up
comp114023_c0	7.2948e-07	1.13918	up
comp11402_c0	2.45534e-05	2.2676	up
comp114051_c0	0.00777734	1.49745	up
comp114189_c0	0.00013216	2.42415	up
comp114241_c0	1.54393e-05	1.24977	up
comp114444_c0	0.00308358	1.01446	up
comp114666_c0	5.68978e-12	3.1223	up
comp114666_c1	0.000288323	2.45663	up
comp115262_c0	0.000291533	2.05907	up
comp115378_c0	3.7403e-07	1.14931	up
comp115551_c0	0	1.94137	up
comp115777_c0	0.000590415	2.17124	up
comp115940_c0	8.79636e-05	1.02627	up
comp115979_c0	5.09474e-05	1.27785	up
comp116005_c0	6.19305e-12	1.48885	up
comp116020_c0	0.00677384	1.00718	up
comp116074_c0	0.00152594	1.17075	up
comp116087_c0	7.45033e-06	1.10839	up
comp116161_c0	9.62389e-09	1.65996	up
comp116188_c0	0.000608971	1.13211	up
comp116236_c0	8.0494e-08	1.61399	up
comp116720_c1	8.33151e-06	1.85131	up
comp116888_c0	2.92243e-06	1.27275	up
comp116888_c1	3.45568e-12	1.79737	up
comp117066_c3	7.87642e-07	1.23561	up
comp117131_c0	0.00184887	2.3088	up
comp117267_c0	3.0824e-07	1.78342	up
comp117336_c0	3.16129e-05	1.51263	up
comp117336_c1	1.44616e-06	2.28317	up
comp117336_c2	7.54518e-07	2.52335	up
comp117452_c0	8.74096e-07	1.72903	up
comp118030_c1	0.00139225	1.94819	up
comp118252_c0	1.44076e-05	1.21175	up
comp118671_c1	1.22652e-07	2.09071	up
comp118768_c0	0.000122138	1.22284	up
comp118975_c0	1.63795e-06	2.79897	up
comp119389_c0	0.000172219	3.71259	up
comp119435_c0	3.68786e-08	1.27888	up
comp119698_c0	4.42498e-09	2.55593	up
comp119754_c0	6.4001e-12	2.97876	up
comp119843_c0	2.37183e-06	1.57605	up
comp119852_c0	1.50482e-05	1.11874	up
comp119975_c0	0.00301302	1.65559	up
comp119991_c0	0	3.6462	up
comp120002_c0	0	2.23374	up
comp120146_c0	4.4518e-06	1.18801	up
comp120169_c0	0.00875059	1.45217	up
comp120268_c0	6.02296e-13	3.28962	up
comp120298_c0	1.82279e-10	2.20535	up
comp120326_c0	2.34686e-10	1.43098	up
comp120419_c0	4.60671e-05	1.10671	up
comp120524_c0	1.44507e-05	1.25786	up
comp120536_c1	0.00742717	1.38763	up
comp120655_c0	1.21238e-05	2.05754	up
comp120734_c0	9.68585e-08	2.51311	up
comp120761_c0	7.72361e-05	1.08425	up
comp120771_c0	0.000226286	1.03911	up
comp120780_c0	5.36211e-11	1.41671	up
comp120889_c0	0.000801526	1.06669	up
comp120889_c1	5.72837e-09	1.30402	up
comp121108_c0	0.00013216	2.42415	up
comp121260_c1	0.000663621	1.27603	up
comp121261_c0	5.8491e-05	3.15699	up
comp121345_c0	7.77642e-06	1.20209	up
comp121682_c0	0.00478491	1.67551	up
comp121692_c0	0.00828075	1.17516	up
comp121984_c0	0.0064483	1.82808	up
comp122041_c0	0.000938348	1.93377	up
comp122349_c2	0.000193421	1.17651	up
comp122413_c0	0.000174903	3.06972	up
comp122433_c0	0.00193829	1.09548	up
comp122463_c0	0	3.26625	up
comp122548_c0	2.88888e-10	1.58793	up
comp122550_c0	0.000371049	1.05257	up
comp122921_c1	0	2.57044	up
comp123046_c0	2.69507e-08	1.35227	up
comp123058_c0	2.09037e-07	1.25149	up
comp123087_c1	1.2833e-05	1.17811	up
comp123191_c0	0.00576892	1.51945	up
comp123306_c1	0.000139702	1.27851	up
comp123432_c0	0	2.53829	up
comp123490_c0	1.28177e-06	3.05828	up
comp123523_c0	0.000100246	1.75841	up
comp123549_c0	0.000132343	2.11147	up
comp123581_c0	0.000190985	1.08807	up
comp123600_c0	0.00738534	2.03137	up
comp123601_c0	5.80029e-06	2.96327	up
comp123629_c1	3.5261e-09	1.27682	up
comp123686_c0	0.00186876	1.80849	up
comp123726_c0	0.00184887	2.3088	up
comp123796_c1	0.00348157	1.02431	up
comp123833_c0	0.00678034	1.18775	up
comp123838_c0	0.00179217	1.15156	up
comp123961_c1	0.00010486	1.09271	up
comp123961_c2	0.000174337	1.15421	up
comp124012_c0	5.41998e-07	1.15512	up
comp124058_c0	0.00478765	1.27172	up
comp124109_c0	0.000615839	1.11909	up
comp124192_c0	0.000624266	1.15463	up
comp124324_c0	5.92331e-05	1.13015	up
comp124324_c2	1.68144e-05	1.30789	up
comp124359_c0	0.000600506	1.14654	up
comp124398_c0	0.000177545	2.1962	up
comp124405_c1	4.33536e-10	2.29476	up
comp124540_c0	0.00112683	1.45936	up
comp124605_c0	9.60553e-05	1.03714	up
comp124773_c0	0.000121788	1.0114	up
comp124793_c0	1.42972e-08	1.34885	up
comp124800_c0	3.74755e-05	1.934	up
comp124802_c0	0.00049397	1.68434	up
comp124816_c0	1.03525e-06	2.0409	up
comp124901_c0	2.25722e-05	1.24377	up
comp124912_c1	0.00329675	1.04377	up
comp124996_c0	0	2.66335	up
comp125035_c3	0.00235072	1.45162	up
comp125113_c0	0.0010675	1.29639	up
comp125163_c0	5.66601e-05	1.60168	up
comp125222_c0	0	2.99867	up
comp125235_c1	0.00677384	1.00718	up
comp125464_c0	0.000148368	1.31698	up
comp125478_c0	1.23613e-07	1.32365	up
comp125554_c0	7.97831e-08	1.1919	up
comp125607_c0	0.000969286	1.66273	up
comp125663_c0	0.00720563	1.67347	up
comp125700_c1	1.07302e-05	1.50406	up
comp125923_c0	0	6.23703	up
comp125951_c0	1.85072e-05	1.04744	up
comp125978_c1	5.14885e-09	1.36867	up
comp126002_c0	8.93953e-09	1.73064	up
comp126040_c0	8.19643e-09	1.25837	up
comp126118_c0	0	1.92829	up
comp126126_c0	2.20706e-07	1.41246	up
comp126170_c0	1.17271e-06	1.2014	up
comp126217_c0	0.00235317	1.37006	up
comp126282_c0	1.72495e-08	1.53059	up
comp126309_c0	1.41809e-05	1.07644	up
comp126327_c4	1.37017e-07	1.68343	up
comp126349_c0	2.09087e-05	1.04554	up
comp126354_c0	0	2.8708	up
comp126456_c0	0.00206211	1.48828	up
comp126585_c0	6.71685e-14	2.16079	up
comp126585_c2	0	2.45205	up
comp126869_c0	1.64734e-06	1.364	up
comp126874_c0	0.000116145	1.36941	up
comp126892_c0	0.000480317	1.56363	up
comp126985_c0	5.27421e-05	1.29485	up
comp126991_c2	0.0035532	1.30706	up
comp127079_c0	1.96713e-07	1.52108	up
comp127206_c0	6.91254e-05	1.37784	up
comp127225_c2	4.71831e-06	1.07865	up
comp127283_c4	0.00540169	1.23426	up
comp127384_c0	3.31326e-07	1.24961	up
comp127409_c1	3.06701e-10	1.5898	up
comp127420_c0	0	2.46988	up
comp127474_c2	0.000434923	1.63426	up
comp127478_c1	1.1059e-07	1.22748	up
comp127490_c0	9.1437e-06	1.21349	up
comp127536_c0	1.0352e-09	1.5338	up
comp127562_c1	0.00773208	1.69971	up
comp127682_c0	0.00402576	1.78627	up
comp127718_c0	4.08561e-05	1.00692	up
comp127757_c0	0	2.17954	up
comp127821_c0	2.82673e-06	1.14831	up
comp127943_c0	0.00121478	1.77492	up
comp127951_c0	0.00015278	1.26707	up
comp127962_c0	2.1841e-06	1.26354	up
comp128173_c1	4.16456e-05	1.16648	up
comp128182_c0	0.00371222	3.40543	up
comp128186_c0	3.04836e-06	1.37614	up
comp128233_c0	5.30076e-06	1.369	up
comp128256_c0	6.0984e-05	1.53342	up
comp128313_c0	0.000101796	1.77857	up
comp128429_c0	1.16219e-06	1.13306	up
comp128482_c0	2.32747e-07	1.19559	up
comp128549_c0	0.000162092	1.48326	up
comp128561_c0	2.64109e-10	1.34641	up
comp128610_c0	0.00023061	1.65427	up
comp128610_c1	1.83442e-08	1.46175	up
comp128673_c0	0.0013283	1.08594	up
comp128679_c2	0.000290384	1.47145	up
comp128901_c0	0	2.64519	up
comp128954_c0	0.00599846	2.9899	up
comp128978_c0	4.28986e-05	1.05207	up
comp129001_c0	6.70237e-11	1.64502	up
comp129065_c0	0.00192994	1.04253	up
comp129093_c0	1.48132e-05	1.65657	up
comp129148_c2	0.000940937	2.02466	up
comp129169_c0	0.000455251	1.17786	up
comp129214_c0	0.00435323	1.00767	up
comp129346_c0	1.27517e-05	1.078	up
comp129549_c0	5.19926e-07	1.14766	up
comp129605_c0	0	1.98668	up
comp129616_c0	8.23426e-11	1.5166	up
comp129638_c0	1.09531e-05	1.17562	up
comp129704_c0	4.88498e-15	2.12414	up
comp129803_c0	8.39888e-07	1.12686	up
comp129818_c1	0.00649303	1.26028	up
comp129826_c0	2.95959e-07	1.20174	up
comp129846_c0	0.00951152	2.51525	up
comp129882_c0	0.00186876	1.80849	up
comp129919_c0	2.36984e-05	1.26885	up
comp129920_c0	8.30567e-06	1.08668	up
comp129942_c0	0.000144789	1.17325	up
comp130051_c0	0	2.92875	up
comp130108_c0	0.00030016	1.86792	up
comp130120_c0	1.77283e-06	2.06717	up
comp130120_c1	0.00104001	2.45767	up
comp130120_c2	5.96463e-05	3.41936	up
comp130120_c3	7.32158e-05	1.41545	up
comp130159_c2	5.06061e-06	1.07287	up
comp130176_c0	0.00263473	1.29295	up
comp130320_c2	0.000871736	1.39107	up
comp130321_c0	2.4317e-06	2.34822	up
comp130355_c0	0.00584688	1.23636	up
comp130390_c0	0	3.57297	up
comp130390_c1	0.000598	3.22055	up
comp130401_c0	0.000251751	1.14324	up
comp130405_c0	0.00748049	1.04262	up
comp130672_c2	7.11948e-05	1.98955	up
comp130677_c0	1.21764e-09	4.53395	up
comp130677_c1	6.2734e-06	1.09436	up
comp130679_c0	3.00431e-07	1.88656	up
comp130824_c1	1.81992e-10	1.80841	up
comp130824_c2	1.44063e-08	1.26733	up
comp130899_c0	5.18837e-05	1.04725	up
comp130919_c0	1.46096e-08	2.34863	up
comp130929_c0	0	2.24297	up
comp130949_c0	5.81757e-14	1.5372	up
comp130971_c0	0.000938348	1.93377	up
comp131250_c4	8.49232e-12	1.67788	up
comp131261_c0	0.000115564	1.25656	up
comp131303_c1	0	1.78432	up
comp131303_c6	1.44275e-06	2.02497	up
comp131362_c0	2.66949e-06	1.10875	up
comp131459_c0	1.59708e-06	1.18795	up
comp131485_c0	6.82625e-07	1.14372	up
comp131501_c0	4.90515e-09	1.39183	up
comp131597_c0	0.00292571	1.067	up
comp131881_c0	2.943e-05	1.1231	up
comp131900_c0	6.60111e-05	1.44015	up
comp131938_c0	0.00299431	1.07277	up
comp131969_c0	2.24059e-05	1.16523	up
comp132153_c0	9.31451e-06	1.05514	up
comp132166_c0	0	3.12551	up
comp132251_c0	0.000788174	1.59777	up
comp132251_c1	1.29143e-09	1.76167	up
comp132279_c0	0.000829605	1.17494	up
comp132358_c0	0.00155436	1.12507	up
comp132413_c4	0.00154151	1.34072	up
comp132449_c0	0.000805315	1.12534	up
comp132488_c0	0.00235072	1.45162	up
comp132528_c0	0.00773208	1.69971	up
comp132690_c0	2.49795e-06	2.05011	up
comp132751_c0	2.44182e-07	1.162	up
comp132764_c1	0.00146308	2.54903	up
comp132796_c0	2.43849e-10	1.4655	up
comp132838_c0	2.02849e-12	1.93711	up
comp132851_c0	0.000176726	1.14203	up
comp132933_c0	0.00279678	1.05637	up
comp133026_c0	3.38487e-11	1.38935	up
comp133207_c3	0.000348149	1.68541	up
comp133281_c1	0.000191368	1.04996	up
comp133291_c1	1.66533e-15	1.60668	up
comp133397_c0	0.000237561	1.49253	up
comp133521_c0	2.77117e-06	1.14118	up
comp133543_c0	8.33151e-06	1.85131	up
comp133624_c0	9.89687e-07	1.59856	up
comp133735_c0	3.47426e-08	1.27073	up
comp133785_c1	0.00128147	1.21674	up
comp133788_c0	3.40012e-07	1.15824	up
comp133814_c0	0.00702944	1.91653	up
comp133840_c0	0	1.78643	up
comp133850_c0	0.000435595	1.10353	up
comp133861_c0	4.13445e-11	3.21671	up
comp133861_c1	1.15379e-05	1.69338	up
comp133905_c0	6.0535e-10	1.47585	up
comp133919_c3	0.00606991	1.17197	up
comp133921_c0	4.30311e-05	1.01202	up
comp133924_c0	0.00738534	2.03137	up
comp133959_c0	0.002721	1.47015	up
comp133964_c0	3.5692e-05	1.1501	up
comp134000_c0	5.96712e-09	1.40488	up
comp134055_c0	2.33367e-05	1.18813	up
comp134236_c0	0.0016672	1.51719	up
comp134254_c1	0.00314904	1.98353	up
comp134344_c0	0.00126072	1.80336	up
comp134366_c0	4.82748e-11	2.96586	up
comp134366_c2	1.81094e-06	1.11969	up
comp134414_c0	3.36774e-06	1.25858	up
comp134516_c3	3.33067e-16	2.03207	up
comp134559_c0	0.00208435	1.96463	up
comp134581_c0	1.09912e-12	1.46772	up
comp134814_c0	4.47365e-10	1.44945	up
comp134894_c1	0.00280472	1.23517	up
comp134928_c4	0.000434162	1.54142	up
comp135024_c0	0.000201889	1.06084	up
comp135066_c0	6.19248e-05	1.36768	up
comp135110_c1	8.13309e-08	1.8487	up
comp135263_c0	6.89492e-10	1.44717	up
comp135277_c1	3.71386e-06	2.00353	up
comp135307_c0	1.24858e-07	1.64747	up
comp135554_c0	5.41145e-11	2.28473	up
comp135740_c1	0.0078042	1.04838	up
comp135839_c0	6.89731e-05	1.02086	up
comp136211_c1	0.00867353	1.03411	up
comp136492_c0	0.000132343	2.11147	up
comp136497_c0	0.00189284	1.06633	up
comp136512_c0	0.00323661	1.239	up
comp136525_c0	9.96505e-06	1.05612	up
comp136615_c0	5.42907e-05	1.11884	up
comp136698_c0	0.000450701	1.0623	up
comp136698_c1	0.000165767	1.07111	up
comp136710_c0	4.19601e-08	1.65312	up
comp136736_c1	6.90966e-05	1.12214	up
comp136767_c1	0.002067	1.01504	up
comp13684_c0	0.000782351	4.22527	up
comp136895_c0	2.34253e-09	1.29061	up
comp137121_c0	0.000164641	2.26224	up
comp137207_c0	2.22045e-16	2.0971	up
comp137242_c0	6.89942e-07	1.39369	up
comp137254_c0	5.39704e-08	1.26041	up
comp137327_c2	5.3102e-13	1.51193	up
comp137487_c0	0.000152211	1.0376	up
comp137536_c0	3.39179e-06	1.87648	up
comp137570_c0	2.15866e-07	1.1791	up
comp137648_c2	0.00939444	1.79643	up
comp137649_c0	0.00507307	1.15757	up
comp137682_c0	0.00379476	1.26331	up
comp137764_c0	0.000119765	1.10174	up
comp137779_c1	7.1298e-05	1.25193	up
comp137787_c2	0	1.84052	up
comp137813_c0	0.00889986	1.09367	up
comp137814_c0	3.90262e-07	1.21881	up
comp137830_c1	1.73304e-09	2.6958	up
comp137910_c0	0	3.74718	up
comp137956_c0	3.67199e-06	1.10402	up
comp137996_c3	0.00132145	1.01167	up
comp137999_c0	1.33898e-10	1.72477	up
comp138113_c0	1.67694e-08	1.51427	up
comp138231_c0	1.85388e-06	1.13473	up
comp138273_c0	6.00631e-14	1.54844	up
comp138503_c2	0.00179414	1.7783	up
comp138797_c0	0.00567375	1.10525	up
comp138829_c1	1.06665e-05	1.05356	up
comp139281_c1	6.38435e-07	1.44114	up
comp139414_c0	0.00331013	1.0252	up
comp139803_c0	7.2796e-05	1.00914	up
comp139932_c0	6.61267e-08	1.19745	up
comp139944_c0	2.22314e-05	1.02712	up
comp139965_c0	0.000365632	1.19396	up
comp140053_c0	0.000866318	1.06168	up
comp140087_c0	0.00554476	1.20024	up
comp140211_c0	0.000100214	1.09937	up
comp140322_c2	0.000310668	1.01569	up
comp140523_c1	0	3.05701	up
comp140523_c2	0	3.13794	up
comp140564_c1	0.00023475	1.09388	up
comp140869_c0	6.10551e-06	1.06806	up
comp140873_c0	7.65006e-05	1.00528	up
comp141219_c0	0	1.99194	up
comp141268_c0	3.9151e-07	1.14866	up
comp141308_c0	8.02013e-07	1.14962	up
comp141661_c0	0.000828747	1.0545	up
comp141935_c1	5.55256e-07	1.48279	up
comp141986_c0	0.00169512	1.1099	up
comp142043_c0	0.00996173	1.13593	up
comp142043_c1	1.09838e-08	1.26976	up
comp142074_c0	3.19934e-05	1.28373	up
comp142109_c0	0.000366004	1.21533	up
comp142134_c0	1.62447e-11	1.41573	up
comp142160_c0	3.14859e-13	1.75746	up
comp142288_c1	0.00188185	1.08312	up
comp142446_c0	1.83429e-10	1.34949	up
comp142513_c0	8.1358e-08	1.19491	up
comp142592_c0	2.85381e-05	1.16272	up
comp142600_c1	0	1.91074	up
comp142768_c0	0.0014211	1.56033	up
comp146955_c0	0.00092731	2.07854	up
comp152445_c0	2.51363e-09	1.30296	up
comp175739_c0	7.09892e-06	1.4133	up
comp189529_c0	0.00126072	1.80336	up
comp254_c0	6.27882e-07	4.85567	up
comp338203_c0	4.76825e-11	3.7581	up
comp340352_c0	0.000317597	3.65617	up
comp398367_c0	0.00686631	3.33529	up
comp423120_c0	0.00106509	3.16625	up
comp643274_c0	0.00108418	3.53624	up
comp64543_c0	0	4.52262	up
comp64543_c1	0	5.10931	up
comp65661_c0	0.00200588	3.47232	up
comp657324_c0	0.000403172	4.2954	up
comp65879_c0	0.000263444	1.72277	up
comp66671_c1	0.000910177	1.0329	up
comp68039_c0	7.47031e-09	1.67785	up
comp68983_c0	4.55472e-05	2.09073	up
comp69538_c0	0.000187188	1.72237	up
comp71549_c0	0.00478009	2.14226	up
comp76818_c0	2.20314e-11	2.45158	up
comp79315_c0	5.80029e-06	2.96327	up
comp79750_c0	7.30194e-13	1.50783	up
comp80215_c0	2.84661e-13	3.03114	up
comp80945_c0	2.43438e-07	1.9604	up
comp81756_c0	2.08923e-05	1.82379	up
comp82300_c0	1.89235e-05	3.50935	up
comp82362_c1	3.5984e-10	2.57398	up
comp82659_c0	0.00464568	2.77092	up
comp83768_c0	7.47751e-07	3.46126	up
comp83824_c0	5.25538e-05	1.75517	up
comp84282_c0	0.000422397	2.80404	up
comp84338_c0	2.53381e-07	1.27808	up
comp85128_c0	0.00583724	1.04631	up
comp86560_c0	0.000371049	1.05257	up
comp87097_c0	0.00112334	1.41488	up
comp88144_c0	0.00569938	1.30391	up
comp887348_c0	0.000782351	4.22527	up
comp89218_c0	0.00202041	2.66686	up
comp89387_c0	0.000782351	4.22527	up
comp93875_c0	0.00463078	2.2288	up
comp94106_c0	0.000505061	1.57566	up
comp95047_c0	0.00676932	1.0217	up
comp97999_c0	1.48562e-08	2.65711	up
comp99140_c0	0.00116448	2.3472	up
comp100214_c0	6.82499e-12	-5.60809	down
comp100249_c0	5.99123e-05	-2.53693	down
comp100273_c1	0.00205064	-4.17495	down
comp100946_c0	3.63476e-05	-4.58705	down
comp101052_c0	0	-7.28001	down
comp1011406_c0	0.00114437	-4.24153	down
comp101162_c0	0.00321732	-2.44713	down
comp101233_c0	0.000883616	-1.37684	down
comp101615_c0	0	-6.784	down
comp101636_c0	0	-8.45094	down
comp101831_c0	2.42889e-10	-5.41967	down
comp102838_c0	0	-2.08353	down
comp103064_c0	0.00904986	-1.49788	down
comp103137_c0	0	-7.85923	down
comp103419_c0	2.42851e-07	-4.987	down
comp103427_c0	0	-6.37332	down
comp103987_c0	8.99827e-05	-2.50846	down
comp104388_c0	4.66515e-05	-1.27775	down
comp104777_c0	4.47709e-09	-1.3148	down
comp104996_c0	0.00114437	-4.24153	down
comp105074_c0	6.41876e-05	-4.53491	down
comp105074_c1	1.15463e-14	-5.90368	down
comp105379_c1	0.000105261	-1.41127	down
comp106000_c0	0.000113635	-4.48081	down
comp106206_c0	0.000113635	-4.48081	down
comp106232_c0	1.49311e-05	-1.57011	down
comp106300_c0	0	-3.0917	down
comp106336_c0	9.24061e-08	-4.28598	down
comp106354_c0	7.9603e-14	-5.81901	down
comp106425_c0	1.99019e-12	-2.26908	down
comp106539_c0	0	-2.16125	down
comp106806_c0	1.40861e-07	-5.0253	down
comp106958_c0	0	-7.20692	down
comp107332_c0	0	-6.02228	down
comp107332_c1	0	-7.34202	down
comp107353_c0	0.00463975	-1.11225	down
comp107365_c0	1.26194e-06	-4.8656	down
comp107383_c2	0.00046512	-1.42249	down
comp107579_c0	2.17691e-05	-2.19073	down
comp107676_c0	2.27663e-11	-4.30119	down
comp107706_c0	1.69859e-05	-2.52841	down
comp1077385_c0	4.77165e-08	-5.09898	down
comp107846_c0	7.18389e-05	-3.3894	down
comp108081_c0	0.000168871	-1.23807	down
comp108095_c0	1.15463e-14	-5.90368	down
comp1082927_c0	0.000640051	-4.30517	down
comp108412_c0	0	-6.42211	down
comp1084939_c0	3.63476e-05	-4.58705	down
comp108558_c0	5.86642e-13	-1.50441	down
comp108797_c0	6.14644e-05	-1.33753	down
comp1088818_c0	1.21176e-06	-4.11268	down
comp108984_c1	4.44089e-15	-5.94422	down
comp1092115_c0	6.69891e-06	-4.73304	down
comp109414_c0	0	-6.37683	down
comp110097_c0	3.07154e-12	-1.94741	down
comp110137_c0	3.86984e-06	-2.29003	down
comp110356_c0	3.1516e-06	-2.41188	down
comp110857_c0	0.000364953	-1.04189	down
comp110898_c0	4.01124e-13	-2.21257	down
comp111179_c0	0.000640051	-4.30517	down
comp111350_c0	1.08424e-12	-1.70731	down
comp111788_c0	0.000209296	-1.72922	down
comp111855_c1	1.2795e-06	-2.30178	down
comp112014_c0	3.16204e-06	-1.10518	down
comp112018_c0	5.66364e-07	-2.04061	down
comp112044_c0	0.00141055	-1.47196	down
comp112536_c0	0	-6.31268	down
comp112590_c0	0.0012464	-2.08107	down
comp112592_c0	0	-2.16907	down
comp112623_c0	1.26194e-06	-4.8656	down
comp112899_c0	0.0014198	-1.24346	down
comp113020_c0	9.33196e-11	-1.91419	down
comp113034_c0	6.99441e-15	-1.69697	down
comp113218_c0	4.505e-10	-1.36858	down
comp113268_c0	2.34701e-13	-1.71425	down
comp113541_c0	1.18195e-08	-3.46469	down
comp113630_c0	4.0791e-10	-5.39062	down
comp113682_c1	3.83093e-06	-4.77859	down
comp113682_c2	0.000195824	-3.30494	down
comp113890_c0	1.36884e-10	-1.49796	down
comp113961_c0	0.00759163	-2.36508	down
comp114070_c0	3.75255e-14	-1.56478	down
comp114162_c0	1.17425e-05	-4.686	down
comp114281_c0	0.000358842	-4.36613	down
comp114412_c0	0.000201681	-4.42461	down
comp114578_c0	3.31378e-09	-5.26821	down
comp114655_c0	0.000596112	-2.94137	down
comp114684_c0	4.27458e-06	-1.43193	down
comp114700_c0	0.000380816	-2.78434	down
comp114829_c0	3.21255e-05	-1.58354	down
comp115343_c1	0	-8.12916	down
comp115533_c0	0	-3.74968	down
comp115543_c0	0.00876276	-1.08621	down
comp115590_c0	0.00548756	-1.49472	down
comp115713_c0	0.000126502	-1.13928	down
comp115716_c0	0.0092129	-1.42091	down
comp115890_c0	4.87763e-09	-3.5111	down
comp116030_c0	0.00454045	-1.31494	down
comp116055_c0	0.00202485	-1.27309	down
comp116175_c0	9.91304e-05	-1.05633	down
comp116241_c0	0.00118066	-1.05406	down
comp116318_c0	6.52098e-08	-2.19218	down
comp116338_c0	3.62052e-06	-3.61664	down
comp116374_c0	2.53031e-11	-1.44488	down
comp116420_c0	0	-2.53022	down
comp116577_c0	0.00273351	-2.34218	down
comp116730_c0	0.000356523	-1.89124	down
comp116834_c0	0.00274114	-1.47342	down
comp116885_c0	0.000380816	-2.78434	down
comp116919_c0	0	-8.27933	down
comp116928_c0	8.23462e-05	-2.21385	down
comp116929_c1	4.29026e-05	-1.01367	down
comp116937_c0	4.58994e-09	-2.40293	down
comp117337_c0	0	-3.22973	down
comp117486_c0	2.12659e-05	-3.21022	down
comp117612_c0	1.17425e-05	-4.686	down
comp117671_c0	1.01849e-06	-1.14349	down
comp117695_c0	0.000442384	-1.44512	down
comp117721_c0	2.6572e-07	-1.76755	down
comp117802_c0	1.01763e-12	-1.50181	down
comp117827_c0	2.72913e-11	-1.43878	down
comp117867_c0	0	-3.0468	down
comp117880_c1	1.17425e-05	-4.686	down
comp117980_c2	0.00116953	-3.53088	down
comp117984_c0	0.000483099	-1.05687	down
comp118055_c0	1.25879e-06	-3.02981	down
comp118086_c0	7.34689e-09	-4.44069	down
comp118128_c0	4.49158e-05	-1.3269	down
comp118321_c0	6.82499e-12	-5.60809	down
comp118386_c0	0.000826069	-1.41975	down
comp118496_c1	0.00294643	-1.25786	down
comp118619_c0	6.41876e-05	-4.53491	down
comp118714_c0	1.3532e-09	-1.47496	down
comp118809_c0	8.37245e-06	-1.25876	down
comp118839_c1	1.09784e-05	-1.54126	down
comp118866_c0	7.21353e-09	-1.38669	down
comp118954_c0	0.000640051	-4.30517	down
comp119007_c0	0.000358842	-4.36613	down
comp119018_c2	0.000358842	-4.36613	down
comp119024_c0	0.00233942	-2.62464	down
comp119189_c0	4.24275e-05	-1.55893	down
comp119248_c0	0.00227839	-2.25786	down
comp119343_c0	1.90988e-05	-2.15209	down
comp119436_c0	1.26609e-08	-1.6917	down
comp119456_c0	0	-2.20399	down
comp119521_c0	0.000134854	-1.23615	down
comp119626_c0	0	-6.9425	down
comp119632_c0	3.63476e-05	-4.58705	down
comp119803_c0	0.00367434	-2.58179	down
comp119806_c0	1.06759e-12	-1.6868	down
comp119821_c0	0.00403258	-1.0804	down
comp119847_c0	0.00205064	-4.17495	down
comp120034_c0	0.00038778	-1.67051	down
comp120042_c0	3.20288e-07	-1.43892	down
comp120059_c0	2.2083e-06	-3.65126	down
comp120096_c0	0.00545725	-1.16	down
comp120098_c0	3.63476e-05	-4.58705	down
comp120134_c0	0.000640051	-4.30517	down
comp120303_c0	2.06908e-08	-1.8476	down
comp120552_c0	0.000995188	-1.27468	down
comp120622_c0	6.18818e-10	-2.21253	down
comp1206405_c0	0.000640051	-4.30517	down
comp120640_c0	0.000930646	-1.94475	down
comp120785_c0	0.00299056	-1.60178	down
comp120788_c0	9.25926e-13	-3.44719	down
comp120895_c0	0.00721574	-1.18893	down
comp120922_c0	0	-3.92756	down
comp120927_c0	4.42738e-07	-1.20328	down
comp120952_c0	0	-2.60371	down
comp120976_c0	0.000742234	-1.01243	down
comp120994_c1	0.00234341	-1.40116	down
comp121079_c0	0.00594105	-2.08939	down
comp121091_c0	5.19169e-11	-5.50345	down
comp121158_c0	1.16755e-08	-1.42726	down
comp121181_c0	0.00649036	-1.0041	down
comp1213062_c0	0.00205064	-4.17495	down
comp121316_c0	0.00660553	-2.963	down
comp121331_c0	0.000640051	-4.30517	down
comp121360_c1	9.5903e-05	-1.29233	down
comp121363_c0	0.000183655	-1.29022	down
comp121390_c0	0.00633383	-1.62319	down
comp121435_c0	0.00200133	-3.47468	down
comp121485_c0	0.00257619	-1.52887	down
comp121605_c0	0.00527226	-1.77065	down
comp121618_c0	0.000917094	-1.82728	down
comp121618_c1	5.4301e-13	-2.57963	down
comp121724_c0	1.65597e-05	-1.69118	down
comp121769_c0	0	-1.80068	down
comp121774_c0	9.19532e-07	-1.18546	down
comp121835_c0	0.00142141	-1.22731	down
comp121907_c1	0.00248672	-2.80881	down
comp122003_c0	0	-7.82707	down
comp122051_c0	3.71376e-10	-1.46133	down
comp122130_c0	0.00117873	-1.27755	down
comp122152_c0	1.53238e-06	-2.77067	down
comp1221575_c0	1.26194e-06	-4.8656	down
comp122182_c0	0.00494749	-2.40669	down
comp122191_c1	3.12675e-08	-1.67644	down
comp122335_c0	5.39962e-09	-2.61514	down
comp122352_c0	0	-2.05345	down
comp122414_c0	0.00594105	-2.08939	down
comp122415_c1	0.00061172	-1.27278	down
comp122443_c0	0.000409836	-1.56152	down
comp122451_c0	0.000101807	-1.11346	down
comp122584_c0	0	-7.55988	down
comp122589_c0	0.00208868	-2.48648	down
comp122595_c0	0.00529316	-1.96365	down
comp122623_c0	0.00475279	-1.00801	down
comp122663_c2	2.27538e-06	-1.44524	down
comp122819_c0	7.62184e-09	-2.59973	down
comp122833_c0	0.00445679	-1.27913	down
comp122931_c0	3.15303e-14	-2.07104	down
comp122965_c0	0.00978596	-1.22768	down
comp123009_c0	0	-1.88417	down
comp123011_c0	6.82499e-12	-5.60809	down
comp123043_c0	4.56371e-09	-1.74466	down
comp123045_c0	0.00325887	-1.18037	down
comp123063_c0	7.61204e-05	-1.20492	down
comp123080_c0	0.00705187	-1.31717	down
comp123173_c0	0	-2.68529	down
comp123180_c0	1.67611e-09	-2.52291	down
comp123240_c1	8.16347e-13	-1.72359	down
comp123259_c0	2.36498e-06	-1.14888	down
comp123288_c0	0.00079785	-1.77255	down
comp123357_c0	6.88599e-05	-1.52423	down
comp123358_c0	7.77156e-16	-2.42733	down
comp123383_c0	1.01971e-07	-1.53989	down
comp123437_c0	0.00146364	-3.11956	down
comp123473_c0	0.00123515	-1.075	down
comp123485_c0	0.00165252	-1.04537	down
comp123595_c0	8.92952e-13	-1.74791	down
comp123636_c0	6.53508e-06	-1.1172	down
comp123672_c0	0.000253219	-1.02784	down
comp12376_c0	4.0791e-10	-5.39062	down
comp123810_c0	1.24613e-06	-3.40648	down
comp123822_c0	3.9112e-05	-2.96192	down
comp123849_c0	0	-2.3326	down
comp123861_c0	0.000640051	-4.30517	down
comp123877_c0	8.18912e-08	-5.06261	down
comp123926_c0	0.00119357	-1.15814	down
comp123938_c0	0.00135508	-1.7668	down
comp123952_c0	1.20205e-11	-1.63863	down
comp123985_c0	5.31798e-07	-2.22326	down
comp123988_c0	1.94538e-06	-3.00293	down
comp124009_c0	5.19073e-09	-2.88325	down
comp124011_c0	1.66975e-05	-2.11739	down
comp124036_c0	0.000353174	-1.24962	down
comp124046_c0	8.19801e-10	-1.48397	down
comp124057_c0	0.000356874	-1.31183	down
comp124127_c0	0.000632727	-1.05226	down
comp124142_c0	0	-2.31777	down
comp124142_c2	1.79508e-06	-2.2839	down
comp124155_c0	6.69891e-06	-4.73304	down
comp124162_c0	0.0011526	-1.71896	down
comp124288_c0	6.56872e-08	-1.8133	down
comp124322_c0	1.73835e-05	-2.03992	down
comp124325_c0	2.6572e-07	-1.76755	down
comp124330_c0	1.6462e-07	-1.37236	down
comp124345_c0	5.21839e-06	-1.70676	down
comp124388_c0	1.79967e-13	-1.59846	down
comp124435_c0	0.00760639	-1.01871	down
comp124450_c0	0.00855832	-1.28275	down
comp124462_c0	7.79554e-12	-1.49731	down
comp124475_c0	3.51237e-07	-2.47117	down
comp124477_c0	0	-1.8998	down
comp124508_c1	1.63101e-08	-5.16907	down
comp124660_c0	0	-1.93991	down
comp124665_c0	0.000573344	-1.20973	down
comp124716_c0	0	-2.12158	down
comp124740_c0	1.97029e-08	-1.24365	down
comp124838_c0	1.37149e-07	-1.19947	down
comp124874_c0	0.00262916	-1.6891	down
comp124903_c0	0.000797478	-1.00359	down
comp124948_c0	9.02018e-06	-1.0642	down
comp124974_c0	0.00995818	-1.71835	down
comp125004_c0	7.95415e-07	-1.14597	down
comp125008_c0	0.00468991	-2.0377	down
comp125051_c0	0.000118567	-3.34779	down
comp125075_c0	0.000156227	-1.43668	down
comp125097_c0	3.0477e-06	-1.28773	down
comp125118_c0	0.00103146	-1.65156	down
comp125119_c0	0	-6.89158	down
comp125129_c0	6.81264e-10	-1.34447	down
comp125203_c0	1.2753e-07	-1.91328	down
comp125203_c1	3.77476e-15	-3.53882	down
comp125273_c0	0.00135419	-2.52478	down
comp125276_c1	8.88139e-05	-1.45727	down
comp125296_c0	4.69956e-06	-1.10402	down
comp125326_c0	0.00135139	-1.133	down
comp125333_c0	5.26977e-05	-2.01125	down
comp125450_c0	0.00544728	-1.10674	down
comp125618_c0	0.00154563	-2.85436	down
comp125619_c0	0	-1.86869	down
comp125641_c0	7.99648e-11	-1.73192	down
comp125647_c0	0.0012464	-2.08107	down
comp125671_c0	0	-6.91216	down
comp125690_c0	9.96019e-11	-3.25491	down
comp125709_c0	1.58047e-07	-2.15235	down
comp125743_c0	8.62643e-14	-1.59375	down
comp125818_c0	1.70236e-08	-1.36511	down
comp125824_c0	0.00978266	-1.97236	down
comp125840_c1	3.86938e-07	-2.23883	down
comp125852_c1	4.46444e-05	-1.35216	down
comp125901_c0	1.05649e-12	-1.83693	down
comp125915_c0	7.10543e-15	-5.92409	down
comp125925_c0	0.000213297	-1.89023	down
comp125958_c0	0.00749746	-2.1514	down
comp125995_c0	0.001544	-1.69883	down
comp126046_c0	0.00010471	-1.67184	down
comp126091_c0	0.00113825	-1.32094	down
comp126106_c0	1.39199e-06	-1.95191	down
comp126119_c0	3.31837e-05	-1.28385	down
comp126152_c0	0.00759163	-2.36508	down
comp126159_c0	4.5677e-06	-1.61533	down
comp126169_c0	0	-6.39965	down
comp126193_c0	4.20849e-06	-2.33761	down
comp126227_c0	0	-1.87275	down
comp126248_c0	0.00687056	-1.07862	down
comp126287_c0	0.000781305	-1.17012	down
comp126352_c0	0.00102885	-1.14406	down
comp126358_c0	9.18071e-07	-2.16114	down
comp126376_c0	2.49587e-06	-1.13191	down
comp126384_c0	0.000111999	-1.22765	down
comp126451_c0	0.000315759	-1.6629	down
comp126519_c0	2.9017e-06	-1.6649	down
comp126544_c0	9.85617e-05	-1.3883	down
comp126603_c1	0	-6.28137	down
comp126650_c2	0.000437883	-1.91435	down
comp126663_c0	0.000103535	-1.00297	down
comp126664_c0	0.00413388	-2.30487	down
comp126758_c0	6.85813e-10	-1.33773	down
comp126785_c0	0.00118976	-2.41402	down
comp126791_c0	0.0031799	-1.73732	down
comp126813_c1	8.60423e-13	-2.09048	down
comp126838_c1	0.00105249	-2.1601	down
comp126859_c0	1.52101e-12	-5.68188	down
comp126873_c0	1.12536e-08	-1.26952	down
comp126883_c1	1.97842e-12	-1.54563	down
comp126883_c2	1.3651e-06	-1.32049	down
comp126901_c0	0.000258439	-1.50813	down
comp126990_c0	8.5143e-13	-1.49445	down
comp127028_c1	4.19654e-07	-4.94766	down
comp127074_c0	0	-1.79338	down
comp127084_c0	1.49394e-05	-1.5117	down
comp127094_c0	0.000370068	-2.98298	down
comp127173_c0	0.00336289	-1.70088	down
comp127188_c0	0.00025	-1.14839	down
comp127222_c0	5.80484e-05	-1.32325	down
comp127280_c0	0.00918385	-1.3892	down
comp127319_c0	0.00540472	-1.51556	down
comp127339_c0	0.00127322	-2.22012	down
comp127368_c0	0.000446952	-1.35788	down
comp127401_c0	4.90831e-10	-1.51063	down
comp127412_c0	1.37647e-06	-1.70843	down
comp127496_c0	8.72654e-05	-1.13819	down
comp127526_c0	0.00641385	-2.71314	down
comp127601_c0	3.95252e-11	-1.41717	down
comp127611_c0	8.10501e-05	-1.68603	down
comp127665_c0	0.000376966	-1.43415	down
comp127666_c0	2.68075e-05	-1.71184	down
comp127688_c1	1.11022e-16	-1.6954	down
comp127696_c0	0	-2.31026	down
comp127714_c0	0	-3.43556	down
comp127722_c0	5.61727e-08	-1.25557	down
comp127725_c0	6.6513e-11	-1.73089	down
comp127728_c0	0	-1.74133	down
comp127741_c1	4.76093e-08	-1.21964	down
comp127775_c0	2.22935e-08	-1.25023	down
comp127796_c0	0	-6.45976	down
comp127797_c0	0.000791104	-1.32666	down
comp127828_c0	0.00897963	-1.33572	down
comp127842_c0	7.19709e-06	-2.91914	down
comp127871_c0	0.00121276	-1.43019	down
comp127905_c1	0.00339567	-2.22324	down
comp127916_c0	7.81615e-06	-2.67143	down
comp128011_c1	0.000358842	-4.36613	down
comp128024_c0	4.01124e-13	-2.21257	down
comp128056_c1	1.26194e-06	-4.8656	down
comp128090_c0	0.00247655	-1.04566	down
comp128095_c0	1.8392e-12	-2.06777	down
comp128100_c0	0.00382009	-1.60827	down
comp128154_c0	4.84049e-05	-1.31223	down
comp128180_c0	0.00920585	-1.40458	down
comp128201_c0	5.76517e-12	-2.03303	down
comp128202_c0	9.44193e-10	-1.79817	down
comp128282_c0	3.13779e-09	-3.53376	down
comp128347_c0	0	-2.29046	down
comp128369_c3	3.78832e-05	-1.20833	down
comp128375_c0	2.07861e-10	-1.86061	down
comp128407_c0	0	-1.84616	down
comp128500_c0	0.000683954	-3.58498	down
comp128503_c0	0.00631392	-1.09809	down
comp128563_c0	2.81479e-10	-1.6501	down
comp128604_c0	8.96587e-10	-1.71736	down
comp128615_c0	2.23155e-14	-1.59246	down
comp128645_c0	0.000359257	-1.17906	down
comp128654_c0	1.21778e-05	-2.27636	down
comp128714_c0	0	-2.71718	down
comp128805_c0	0.000865044	-2.10899	down
comp128822_c0	8.59612e-12	-1.56495	down
comp128869_c0	3.31551e-08	-1.31671	down
comp128872_c0	9.04101e-07	-1.77358	down
comp128872_c1	4.57745e-06	-1.40921	down
comp128955_c1	0.00503967	-1.21144	down
comp128966_c0	0.00205064	-4.17495	down
comp129007_c0	0.000220156	-1.43574	down
comp129009_c0	0	-2.62867	down
comp129025_c1	0.000217496	-1.56898	down
comp129101_c1	0	-2.48295	down
comp129133_c0	7.42006e-12	-1.54046	down
comp129146_c0	1.4849e-09	-1.43904	down
comp129154_c0	0.000976452	-1.67857	down
comp129181_c1	2.22045e-16	-2.33355	down
comp129220_c0	0	-3.84569	down
comp129237_c0	0	-5.09618	down
comp129337_c0	9.93708e-10	-1.63883	down
comp129379_c0	4.08018e-05	-1.70617	down
comp129393_c0	0	-2.03377	down
comp129408_c0	1.75609e-07	-1.24199	down
comp129476_c0	0	-2.46448	down
comp129487_c1	2.03882e-05	-1.15288	down
comp129523_c0	9.13955e-09	-1.27817	down
comp129554_c0	0.00257718	-2.02355	down
comp129576_c0	1.23546e-12	-2.84545	down
comp129600_c0	1.45605e-05	-1.29468	down
comp129668_c0	0.00382383	-1.79611	down
comp129681_c0	0	-2.18186	down
comp129715_c0	9.87876e-13	-1.51373	down
comp129745_c0	3.81917e-14	-1.56411	down
comp129749_c1	0.00135558	-1.1358	down
comp129772_c0	0.000765334	-1.20643	down
comp129838_c0	1.5002e-10	-2.96101	down
comp129884_c0	0.000158299	-2.29981	down
comp129908_c0	5.35933e-05	-1.02273	down
comp12994_c0	0.000640051	-4.30517	down
comp129958_c0	5.88368e-08	-1.44259	down
comp129970_c0	0	-2.69839	down
comp129971_c0	0	-1.894	down
comp130003_c0	9.80327e-14	-1.7206	down
comp130040_c0	0.00131747	-1.3627	down
comp130086_c0	4.13345e-09	-1.625	down
comp13011_c0	0	-6.45976	down
comp130173_c0	1.08461e-05	-1.37718	down
comp130230_c0	3.92016e-05	-1.04238	down
comp130372_c2	1.05843e-06	-2.47227	down
comp130379_c0	1.41918e-07	-1.55164	down
comp130388_c0	0.00118114	-1.5806	down
comp130418_c1	2.61458e-13	-4.18953	down
comp130444_c0	6.26499e-13	-1.50114	down
comp130500_c0	7.9603e-14	-5.81901	down
comp130511_c1	0.00157522	-1.38133	down
comp130634_c1	0.00044386	-1.12204	down
comp130697_c0	1.85644e-07	-2.02295	down
comp130758_c1	1.49009e-07	-2.28455	down
comp130758_c3	0.00287146	-1.00338	down
comp130767_c0	9.88103e-07	-1.16894	down
comp130787_c0	1.54132e-12	-2.94265	down
comp130846_c0	6.88805e-10	-1.3552	down
comp130877_c0	0.00195025	-1.36829	down
comp130894_c1	0.000782287	-1.16692	down
comp130914_c0	1.19268e-05	-1.29797	down
comp130962_c2	3.40838e-14	-3.46163	down
comp131023_c2	1.34567e-07	-1.29062	down
comp131065_c1	0.00403258	-1.0804	down
comp131074_c0	9.88098e-15	-1.59422	down
comp131080_c0	1.15511e-08	-2.3292	down
comp131086_c0	0.00216904	-1.64882	down
comp131103_c0	5.02897e-06	-1.09742	down
comp131153_c0	0.00422962	-1.13758	down
comp131357_c0	3.82758e-10	-1.37105	down
comp131381_c0	3.13383e-12	-1.52364	down
comp131393_c0	5.88418e-14	-1.65811	down
comp131393_c2	7.10155e-08	-1.26884	down
comp131398_c0	9.04101e-07	-1.77358	down
comp131617_c0	0	-1.74241	down
comp131628_c0	2.1112e-08	-1.48849	down
comp131700_c0	1.56676e-07	-1.36596	down
comp131727_c0	0.000248458	-1.52231	down
comp131746_c0	3.24163e-10	-1.6926	down
comp131751_c1	0.00683707	-1.79051	down
comp131756_c0	0.00231901	-1.41408	down
comp131757_c2	1.50894e-05	-1.07353	down
comp131759_c0	0.00367434	-2.58179	down
comp131801_c0	8.89038e-05	-1.0378	down
comp131908_c0	0.00103454	-1.16224	down
comp131942_c0	0.00257718	-2.02355	down
comp132000_c0	0.000152694	-1.23343	down
comp132008_c0	0.00284404	-1.04425	down
comp132082_c0	0	-2.88591	down
comp132173_c0	6.23334e-11	-1.49733	down
comp132180_c0	4.22388e-09	-1.80074	down
comp132246_c0	9.58259e-08	-1.20016	down
comp132260_c0	0.000352701	-1.05459	down
comp132277_c1	6.79235e-07	-2.81784	down
comp132281_c0	1.60679e-05	-1.30616	down
comp132478_c0	4.22329e-12	-1.49144	down
comp132530_c1	6.56714e-10	-1.34061	down
comp132570_c0	3.53646e-09	-2.6905	down
comp132576_c0	0.00700004	-1.30682	down
comp132616_c0	0	-2.19032	down
comp132659_c0	0.000430422	-1.45716	down
comp132695_c2	0.00249544	-1.04716	down
comp132701_c0	4.53928e-07	-1.32961	down
comp132736_c0	0.000165039	-1.32377	down
comp132741_c0	0	-2.10542	down
comp132805_c0	1.39645e-08	-1.71142	down
comp132858_c0	7.8825e-06	-1.1846	down
comp132994_c0	9.98061e-11	-1.40445	down
comp133013_c1	0.00400084	-3.0171	down
comp133032_c0	1.33227e-15	-1.82908	down
comp133038_c0	3.98308e-05	-1.08673	down
comp133039_c1	0.00090885	-1.59744	down
comp133054_c0	1.11022e-16	-1.87257	down
comp133077_c0	1.90988e-05	-2.15209	down
comp133203_c0	2.93609e-05	-1.14606	down
comp133346_c0	0.000317594	-1.09518	down
comp133348_c0	9.75463e-05	-1.26018	down
comp133421_c0	0	-1.9665	down
comp133493_c1	0.000275617	-1.02156	down
comp133577_c0	0.000295916	-1.68696	down
comp133650_c0	0.00154563	-2.85436	down
comp133689_c0	4.61096e-07	-1.18507	down
comp133698_c0	6.52e-06	-2.37016	down
comp133752_c1	2.11589e-05	-1.13748	down
comp133761_c0	4.32306e-07	-1.31372	down
comp133806_c1	0.000785911	-1.1519	down
comp133830_c0	7.38298e-14	-1.82875	down
comp133876_c0	1.51044e-06	-1.38931	down
comp133884_c0	3.4322e-10	-1.36644	down
comp133887_c0	1.16166e-05	-1.09506	down
comp133893_c0	0.00742233	-1.20045	down
comp133896_c0	1.61591e-05	-1.07024	down
comp133915_c0	1.96464e-07	-1.20354	down
comp133922_c0	0.00161905	-1.35044	down
comp133926_c0	0.00167992	-1.21804	down
comp134005_c0	0.00148765	-2.66625	down
comp134042_c0	2.34479e-06	-1.10641	down
comp134084_c0	1.96756e-06	-1.15837	down
comp134128_c0	1.3798e-06	-2.17553	down
comp134166_c0	9.99201e-16	-2.12887	down
comp134203_c0	7.77156e-16	-1.70748	down
comp134239_c0	1.17119e-11	-2.47495	down
comp134345_c0	0.000945146	-2.70669	down
comp134375_c0	3.78241e-11	-1.451	down
comp134383_c0	2.1669e-08	-1.66188	down
comp134391_c0	0	-1.82197	down
comp134479_c1	0.000708568	-2.06492	down
comp134609_c0	2.20232e-07	-1.18772	down
comp134648_c0	7.12139e-10	-1.84741	down
comp134691_c0	9.0873e-06	-1.24328	down
comp134711_c0	5.6064e-11	-1.42301	down
comp134721_c3	1.17871e-09	-1.42811	down
comp134853_c0	9.42423e-05	-1.26824	down
comp134860_c0	2.08722e-14	-1.96238	down
comp134868_c3	0	-2.08822	down
comp134889_c0	0.00571608	-1.35469	down
comp134938_c1	5.24469e-13	-2.52736	down
comp134953_c0	0.0082707	-1.86918	down
comp134953_c1	1.36005e-07	-1.29136	down
comp134985_c3	3.41972e-08	-1.56053	down
comp135018_c0	0.0033211	-1.1167	down
comp135074_c1	9.64379e-06	-1.31396	down
comp135122_c0	1.52929e-10	-1.65837	down
comp135132_c0	0.00198502	-1.05883	down
comp135161_c0	0.000170698	-1.08031	down
comp135174_c0	4.03667e-06	-3.12001	down
comp135175_c0	2.71908e-05	-1.08129	down
comp135180_c1	0.00122505	-1.68825	down
comp135223_c0	0.00424098	-1.22876	down
comp135228_c0	6.43728e-05	-1.01113	down
comp135239_c0	5.2728e-07	-1.18297	down
comp135249_c0	0	-2.50528	down
comp135261_c0	0.00762318	-1.70344	down
comp135300_c0	0.000216432	-1.23622	down
comp135331_c0	0.000427999	-1.14626	down
comp135336_c0	0	-3.48324	down
comp135339_c2	1.11666e-07	-1.19717	down
comp135354_c0	9.78661e-10	-1.60446	down
comp135429_c1	0.00158415	-1.54314	down
comp135431_c0	1.43136e-08	-1.2982	down
comp135456_c2	1.27924e-08	-1.31161	down
comp135478_c0	2.77319e-06	-1.10121	down
comp135509_c0	0.00705187	-1.31717	down
comp135519_c0	6.55032e-15	-2.10727	down
comp135591_c2	0.00440192	-1.26333	down
comp135594_c1	1.05107e-10	-1.3997	down
comp135620_c0	3.51174e-05	-1.02004	down
comp135633_c0	0.00815733	-1.24842	down
comp135713_c0	0	-2.5814	down
comp135886_c0	0	-1.9196	down
comp135927_c3	0.00323607	-2.06929	down
comp135963_c0	0.000640051	-4.30517	down
comp135972_c0	1.09195e-07	-1.21821	down
comp135973_c0	2.22045e-16	-2.27326	down
comp135984_c0	1.00394e-06	-1.16049	down
comp136003_c0	3.91017e-11	-1.64589	down
comp136043_c0	6.00585e-05	-1.1433	down
comp136043_c1	0.000294149	-1.12502	down
comp136050_c0	0	-3.79332	down
comp136121_c0	1.72782e-07	-2.50716	down
comp136214_c0	4.94105e-05	-1.41533	down
comp136363_c0	1.72867e-06	-1.11535	down
comp136384_c0	0.00028891	-1.09808	down
comp136433_c0	2.17398e-08	-3.12021	down
comp136463_c1	1.99579e-11	-1.53482	down
comp136529_c0	0	-2.18743	down
comp136855_c0	6.28183e-06	-1.07632	down
comp136858_c0	0	-2.16179	down
comp136871_c0	1.88738e-15	-1.64447	down
comp136928_c0	0	-2.2008	down
comp136928_c1	0.000209296	-1.72922	down
comp136947_c0	2.22045e-16	-1.84302	down
comp136984_c0	0.00235329	-1.59583	down
comp137054_c0	1.55751e-07	-1.25498	down
comp137068_c0	0.00822297	-1.63181	down
comp137068_c1	0	-2.72195	down
comp137127_c0	0.00134003	-1.05724	down
comp137152_c0	1.59326e-09	-2.10292	down
comp137163_c0	0.000353174	-1.24962	down
comp137179_c0	1.56914e-08	-2.5161	down
comp137191_c0	6.49995e-09	-1.96121	down
comp137195_c0	0	-3.6517	down
comp137291_c0	7.88559e-05	-1.07657	down
comp137500_c0	3.06314e-05	-1.05008	down
comp137579_c1	0	-1.85077	down
comp13762_c0	0.000640051	-4.30517	down
comp137664_c0	0.00163327	-1.95011	down
comp137857_c0	0.00846143	-1.27359	down
comp137876_c0	0.00893205	-1.12967	down
comp137876_c1	1.59445e-05	-1.44948	down
comp137894_c0	6.59228e-07	-1.36049	down
comp137894_c1	0.00233942	-2.62464	down
comp137988_c1	0.000748719	-1.23283	down
comp137989_c0	9.83198e-06	-1.20672	down
comp138024_c0	0	-4.05304	down
comp138024_c1	2.27667e-10	-4.6327	down
comp138062_c0	8.45146e-12	-1.47815	down
comp138146_c0	1.12922e-07	-1.26281	down
comp138208_c0	3.71925e-14	-1.59749	down
comp138255_c0	3.08642e-14	-1.59975	down
comp138412_c0	0.00901313	-2.49207	down
comp138433_c2	0.00995818	-1.71835	down
comp138437_c1	0.00394318	-1.58193	down
comp138490_c1	3.69648e-07	-1.3305	down
comp138493_c0	0.00676648	-1.04841	down
comp138589_c0	7.56142e-09	-1.34341	down
comp138621_c0	0.000152629	-1.68646	down
comp138643_c0	0	-3.19746	down
comp138905_c0	2.47724e-09	-1.98428	down
comp138948_c0	2.33147e-13	-1.592	down
comp138988_c0	0	-2.2146	down
comp139128_c0	0.000259719	-1.91195	down
comp139143_c0	0.00881926	-1.54524	down
comp139173_c0	0.000787052	-1.11065	down
comp139180_c0	0.00574019	-1.1788	down
comp139278_c2	0.00946843	-1.76311	down
comp139313_c0	2.19996e-08	-2.5007	down
comp139360_c1	2.6316e-07	-1.96737	down
comp139374_c0	4.13236e-05	-2.79928	down
comp139504_c1	0.00585497	-1.89882	down
comp139532_c2	1.88023e-09	-2.37235	down
comp139583_c0	0	-1.8193	down
comp139603_c0	0.000121257	-2.08409	down
comp139631_c0	4.39286e-06	-1.08685	down
comp139678_c2	0.00135508	-1.7668	down
comp139716_c0	0.00167495	-1.50578	down
comp139731_c0	3.53538e-06	-1.33446	down
comp139733_c0	1.81267e-07	-1.51169	down
comp139883_c2	1.39246e-06	-1.15961	down
comp139915_c0	4.15302e-06	-1.23672	down
comp139991_c0	0.00578934	-1.01036	down
comp140005_c0	2.02016e-12	-2.48273	down
comp140013_c0	4.50799e-07	-1.16061	down
comp140208_c0	1.6237e-12	-1.94911	down
comp140245_c0	4.92266e-07	-1.35072	down
comp140275_c0	6.68388e-12	-2.49456	down
comp140286_c0	3.38182e-05	-1.02504	down
comp140305_c0	9.82038e-05	-1.00186	down
comp140366_c0	0.00809604	-1.02486	down
comp140466_c0	2.37272e-05	-1.03311	down
comp140499_c0	2.44778e-06	-1.10542	down
comp140512_c0	8.09149e-09	-2.2536	down
comp140586_c1	0.00818375	-1.07531	down
comp140641_c0	1.54196e-05	-2.21115	down
comp140646_c1	0.000320803	-1.57586	down
comp140731_c1	7.23825e-10	-1.75198	down
comp140813_c0	0.000201834	-1.10628	down
comp140922_c2	0.00152795	-1.11814	down
comp141033_c0	0.000237618	-1.35054	down
comp141140_c0	0.000438999	-1.06429	down
comp141257_c1	0	-2.04547	down
comp141352_c0	9.07718e-12	-1.63476	down
comp141505_c1	9.27098e-05	-1.33199	down
comp141577_c0	2.51124e-11	-1.43137	down
comp141835_c0	0	-1.81179	down
comp142195_c0	5.45268e-10	-2.07979	down
comp142316_c1	2.19669e-12	-1.7651	down
comp142324_c1	3.10831e-05	-1.42498	down
comp142324_c2	0.00026037	-1.07984	down
comp142345_c1	7.44554e-06	-1.20426	down
comp142430_c0	7.79876e-06	-1.44321	down
comp142519_c0	0.000866092	-1.24408	down
comp142718_c0	1.57447e-05	-1.27302	down
comp144084_c0	4.71956e-13	-2.21942	down
comp145369_c0	0	-4.37596	down
comp146334_c0	0	-2.27013	down
comp146381_c0	0.000101112	-1.00624	down
comp147253_c0	0.00198435	-1.20872	down
comp152154_c0	0.000437883	-1.91435	down
comp152653_c0	6.66134e-16	-1.85043	down
comp15290_c0	0.00205064	-4.17495	down
comp153437_c0	0.000387141	-1.96275	down
comp153794_c0	0.00138985	-1.03109	down
comp153874_c0	0.000189046	-1.93236	down
comp154429_c0	6.16951e-13	-2.03188	down
comp15797_c0	1.17425e-05	-4.686	down
comp164402_c0	0.00527226	-1.77065	down
comp165870_c0	1.33017e-06	-1.58846	down
comp16593_c0	2.06339e-05	-4.63737	down
comp166985_c0	5.71941e-07	-2.25765	down
comp17014_c0	0.00205064	-4.17495	down
comp17372_c0	8.6654e-11	-5.47606	down
comp18339_c0	6.41876e-05	-4.53491	down
comp18502_c0	0.000113635	-4.48081	down
comp1948_c1	1.95658e-09	-5.2998	down
comp19596_c0	6.41876e-05	-4.53491	down
comp199133_c0	3.7127e-12	-2.85577	down
comp20074_c0	1.52101e-12	-5.68188	down
comp20103_c0	2.50377e-12	-5.6577	down
comp20216_c0	0.00205064	-4.17495	down
comp20370_c0	1.11022e-16	-6.11377	down
comp20867_c0	1.26194e-06	-4.8656	down
comp21149_c0	6.69891e-06	-4.73304	down
comp21227_c0	0.000358842	-4.36613	down
comp215965_c0	0	-8.18097	down
comp2258_c0	3.83093e-06	-4.77859	down
comp22820_c0	9.56743e-09	-5.20288	down
comp2288_c0	0.000358842	-4.36613	down
comp230628_c0	0	-6.96238	down
comp232271_c0	0	-6.86014	down
comp2382_c0	6.41876e-05	-4.53491	down
comp245123_c0	0	-6.98198	down
comp2489_c0	1.15771e-09	-5.33072	down
comp25168_c0	5.19169e-11	-5.50345	down
comp26292_c0	0	-6.66776	down
comp272130_c0	0	-7.70261	down
comp275693_c0	3.33067e-16	-6.04086	down
comp27606_c0	2.06339e-05	-4.63737	down
comp278309_c0	0	-6.51464	down
comp282542_c0	0	-6.24937	down
comp28325_c0	1.63101e-08	-5.16907	down
comp29663_c0	2.42889e-10	-5.41967	down
comp297454_c0	0	-6.32808	down
comp297586_c0	1.11022e-15	-6.00298	down
comp29829_c0	1.17425e-05	-4.686	down
comp29846_c0	9.25704e-13	-5.70566	down
comp2993_c0	0	-6.40272	down
comp29994_c0	1.52101e-12	-5.68188	down
comp300751_c0	0	-6.29711	down
comp304154_c0	0	-7.34202	down
comp30615_c0	6.41876e-05	-4.53491	down
comp309895_c0	6.82499e-12	-5.60809	down
comp311714_c0	1.11022e-16	-6.09588	down
comp314311_c0	0	-6.29711	down
comp314998_c0	7.9603e-14	-5.81901	down
comp318228_c0	0	-7.32676	down
comp322227_c0	3.33067e-16	-6.04086	down
comp327182_c0	4.82457e-06	-2.45194	down
comp3310_c0	9.56743e-09	-5.20288	down
comp332762_c0	0	-6.45153	down
comp3331_c0	2.77556e-15	-5.96408	down
comp335529_c0	0	-7.0109	down
comp336925_c0	0.00555808	-1.29201	down
comp33806_c0	6.69891e-06	-4.73304	down
comp342560_c0	8.08913e-05	-3.78311	down
comp34318_c0	1.21496e-08	-4.41105	down
comp353216_c0	1.77636e-15	-5.98366	down
comp353646_c0	0	-6.97221	down
comp359114_c0	3.44835e-13	-5.75207	down
comp3600_c0	0.00205064	-4.17495	down
comp363714_c0	0	-7.34958	down
comp365975_c0	0	-6.7501	down
comp3675_c0	0.00205064	-4.17495	down
comp369377_c0	0	-6.41719	down
comp37162_c1	2.11164e-13	-5.77473	down
comp386369_c0	0	-6.16612	down
comp388389_c0	2.50377e-12	-5.6577	down
comp39671_c0	1.63101e-08	-5.16907	down
comp4029_c1	1.40861e-07	-5.0253	down
comp411706_c0	4.0791e-10	-5.39062	down
comp415027_c0	8.6654e-11	-5.47606	down
comp418053_c0	3.11678e-11	-5.53033	down
comp4212_c0	1.52101e-12	-5.68188	down
comp4212_c1	2.1961e-06	-4.82275	down
comp422880_c0	2.78662e-08	-5.13445	down
comp42739_c0	7.12319e-13	-4.91203	down
comp42842_c0	0.000201681	-4.42461	down
comp432116_c0	4.19654e-07	-4.94766	down
comp4328_c0	6.41876e-05	-4.53491	down
comp434795_c0	2.42889e-10	-5.41967	down
comp435001_c0	0.00453908	-1.67822	down
comp442332_c0	0	-6.64334	down
comp4434_c1	0.000113635	-4.48081	down
comp451879_c0	1.63101e-08	-5.16907	down
comp4557_c0	0.00114437	-4.24153	down
comp4561_c0	0	-6.47368	down
comp45790_c0	0.000201681	-4.42461	down
comp46123_c0	6.86476e-10	-5.36098	down
comp461870_c0	1.11022e-16	-6.07777	down
comp463938_c0	6.82499e-12	-5.60809	down
comp464390_c0	5.19169e-11	-5.50345	down
comp46708_c0	1.15463e-14	-5.90368	down
comp4743_c0	2.1961e-06	-4.82275	down
comp4770_c0	4.19654e-07	-4.94766	down
comp479084_c0	0.000201681	-4.42461	down
comp481277_c0	8.56522e-11	-4.68318	down
comp48198_c0	6.69891e-06	-4.73304	down
comp485341_c0	3.63476e-05	-4.58705	down
comp489267_c0	3.31378e-09	-5.26821	down
comp490303_c0	6.69891e-06	-4.73304	down
comp49064_c0	6.41876e-05	-4.53491	down
comp493842_c0	1.26194e-06	-4.8656	down
comp495984_c0	1.95658e-09	-5.2998	down
comp499057_c0	1.15771e-09	-5.33072	down
comp513051_c0	1.15463e-14	-5.90368	down
comp514791_c0	8.6654e-11	-5.47606	down
comp516052_c0	6.82499e-12	-5.60809	down
comp51667_c0	0.000640051	-4.30517	down
comp518033_c0	4.12992e-12	-5.63311	down
comp522484_c0	0	-6.26546	down
comp522884_c0	4.77165e-08	-5.09898	down
comp5288_c0	1.87488e-11	-5.55672	down
comp5288_c1	5.62454e-09	-5.23592	down
comp5317_c0	0.00660553	-2.963	down
comp5334_c0	5.62454e-09	-5.23592	down
comp539474_c0	0.00146364	-3.11956	down
comp542478_c0	1.15771e-09	-5.33072	down
comp546902_c0	7.10543e-15	-5.92409	down
comp550542_c0	3.11678e-11	-5.53033	down
comp551968_c0	1.15771e-09	-5.33072	down
comp556881_c0	0.000201681	-4.42461	down
comp556991_c0	3.31378e-09	-5.26821	down
comp55906_c0	5.62454e-09	-5.23592	down
comp561058_c0	4.12992e-12	-5.63311	down
comp561874_c0	5.62454e-09	-5.23592	down
comp5656_c1	3.63476e-05	-4.58705	down
comp572894_c0	2.1961e-06	-4.82275	down
comp57414_c0	5.19169e-11	-5.50345	down
comp582480_c0	0	-6.43152	down
comp588597_c0	6.69891e-06	-4.73304	down
comp589633_c0	1.15771e-09	-5.33072	down
comp591812_c0	1.95658e-09	-5.2998	down
comp593652_c0	3.83093e-06	-4.77859	down
comp60110_c0	3.11678e-11	-5.53033	down
comp611583_c0	4.19654e-07	-4.94766	down
comp614779_c0	1.44928e-10	-5.44814	down
comp616964_c0	0	-6.31268	down
comp624009_c0	2.1961e-06	-4.82275	down
comp629489_c0	1.87488e-11	-5.55672	down
comp643487_c0	2.1961e-06	-4.82275	down
comp64392_c1	4.03667e-06	-3.12001	down
comp644351_c0	5.62454e-09	-5.23592	down
comp644917_c0	4.12992e-12	-5.63311	down
comp645062_c0	3.63476e-05	-4.58705	down
comp645910_c0	2.11164e-13	-5.77473	down
comp645923_c0	0	-6.50111	down
comp64714_c0	0.000930646	-1.94475	down
comp64836_c0	0	-5.94165	down
comp649364_c0	2.42851e-07	-4.987	down
comp65010_c0	0.000391854	-1.57962	down
comp650763_c0	4.19654e-07	-4.94766	down
comp651637_c0	2.06339e-05	-4.63737	down
comp655536_c0	3.31378e-09	-5.26821	down
comp66703_c0	0	-6.54131	down
comp6680_c0	0.00114437	-4.24153	down
comp66942_c0	1.26262e-07	-2.08483	down
comp67323_c0	4.5867e-06	-2.01727	down
comp67447_c0	0	-7.89586	down
comp67514_c0	0.000417012	-1.73359	down
comp67629_c0	0.00518798	-1.14339	down
comp67710_c0	0	-10.5408	down
comp680427_c0	2.42889e-10	-5.41967	down
comp680846_c0	7.26867e-07	-4.90721	down
comp68204_c0	0.000146304	-2.57937	down
comp682729_c0	1.87488e-11	-5.55672	down
comp683383_c0	0.00114437	-4.24153	down
comp68482_c0	0.000590484	-1.79268	down
comp685030_c0	0.000113635	-4.48081	down
comp68756_c0	0	-7.16465	down
comp690853_c0	4.0791e-10	-5.39062	down
comp69146_c0	0.0012464	-2.08107	down
comp692923_c0	3.63476e-05	-4.58705	down
comp696676_c0	0.000640051	-4.30517	down
comp696866_c0	6.86476e-10	-5.36098	down
comp69782_c0	0	-6.18316	down
comp700234_c0	7.26867e-07	-4.90721	down
comp709347_c0	0.00114437	-4.24153	down
comp71191_c0	0	-6.6556	down
comp71550_c0	7.26867e-07	-4.90721	down
comp71575_c0	0	-6.64334	down
comp71740_c0	0	-6.80617	down
comp71868_c0	0.0012464	-2.08107	down
comp71963_c0	0	-6.828	down
comp72245_c0	3.31378e-09	-5.26821	down
comp723580_c0	9.56743e-09	-5.20288	down
comp723916_c0	4.19654e-07	-4.94766	down
comp72711_c0	0	-6.44571	down
comp72924_c0	2.42889e-10	-5.41967	down
comp730292_c0	1.40861e-07	-5.0253	down
comp73045_c0	4.12992e-12	-5.63311	down
comp731061_c0	0.000137677	-3.73606	down
comp73239_c0	0	-6.92235	down
comp73353_c0	1.29971e-05	-1.5107	down
comp74147_c0	1.11022e-16	-6.11377	down
comp74481_c0	5.64548e-13	-5.72905	down
comp74785_c0	0.000370068	-2.98298	down
comp74787_c0	0.000358842	-4.36613	down
comp74854_c0	8.18912e-08	-5.06261	down
comp74925_c0	0.000201681	-4.42461	down
comp74925_c1	3.11678e-11	-5.53033	down
comp75154_c0	1.17425e-05	-4.686	down
comp75332_c0	0	-7.77744	down
comp75482_c0	0	-6.37332	down
comp75482_c1	0	-7.33441	down
comp75532_c0	6.69891e-06	-4.73304	down
comp76394_c0	7.41987e-06	-2.49853	down
comp770663_c0	7.10543e-15	-5.92409	down
comp777881_c0	3.63476e-05	-4.58705	down
comp77869_c0	1.95658e-09	-5.2998	down
comp77962_c0	0	-6.60592	down
comp7802_c0	2.42889e-10	-5.41967	down
comp782556_c0	1.17425e-05	-4.686	down
comp78408_c0	0	-6.38809	down
comp78737_c0	0	-7.02986	down
comp78893_c1	0.00275986	-2.15624	down
comp7906_c0	6.41876e-05	-4.53491	down
comp79277_c0	0.000201681	-4.42461	down
comp79463_c0	0	-6.34332	down
comp80396_c0	0	-6.46602	down
comp80590_c0	1.17425e-05	-4.686	down
comp80802_c0	0.000584435	-2.2813	down
comp81000_c0	2.06339e-05	-4.63737	down
comp81158_c0	0.000201681	-4.42461	down
comp814923_c0	3.83093e-06	-4.77859	down
comp81543_c0	0.00150248	-1.10841	down
comp815697_c0	0.00205064	-4.17495	down
comp81835_c0	6.40255e-06	-1.53525	down
comp8193_c0	8.6654e-11	-5.47606	down
comp8255_c0	0.000358842	-4.36613	down
comp82700_c0	1.13007e-11	-5.58264	down
comp829498_c0	0.000358842	-4.36613	down
comp83174_c0	4.4752e-11	-1.7074	down
comp83181_c0	1.50317e-07	-1.27359	down
comp83518_c0	0	-2.49874	down
comp83623_c0	2.06339e-05	-4.63737	down
comp83906_c0	5.78829e-06	-3.99773	down
comp84006_c0	2.77556e-15	-5.96408	down
comp84230_c0	0.000358842	-4.36613	down
comp84346_c0	2.16846e-06	-2.8622	down
comp84591_c0	1.40861e-07	-5.0253	down
comp84666_c0	2.42851e-07	-4.987	down
comp846_c1	0.00205064	-4.17495	down
comp848892_c0	0.000113635	-4.48081	down
comp85158_c0	9.56743e-09	-5.20288	down
comp85466_c0	0	-7.66064	down
comp855020_c0	1.95658e-09	-5.2998	down
comp85549_c1	1.1105e-07	-1.71854	down
comp85549_c2	0.000114973	-1.52921	down
comp856436_c0	3.0087e-14	-5.86196	down
comp85643_c0	1.17425e-05	-4.686	down
comp85797_c0	9.25704e-13	-5.70566	down
comp85871_c0	0	-2.04936	down
comp85976_c0	0	-5.14282	down
comp86265_c0	1.29341e-13	-5.79704	down
comp866486_c0	0.000640051	-4.30517	down
comp87022_c0	0.000640051	-4.30517	down
comp87022_c1	0.000113635	-4.48081	down
comp87259_c0	0.000640051	-4.30517	down
comp873953_c0	0.000113635	-4.48081	down
comp882747_c0	2.42889e-10	-5.41967	down
comp88405_c0	6.64851e-05	-1.87072	down
comp88666_c0	2.42889e-10	-5.41967	down
comp89271_c0	3.63476e-05	-4.58705	down
comp8951_c0	6.69891e-06	-4.73304	down
comp898458_c0	9.25704e-13	-5.70566	down
comp909154_c0	0.000201681	-4.42461	down
comp909840_c0	3.83093e-06	-4.77859	down
comp913145_c0	1.17425e-05	-4.686	down
comp92649_c0	2.50377e-12	-5.6577	down
comp92880_c0	0.00114437	-4.24153	down
comp93182_c0	2.06339e-05	-4.63737	down
comp931987_c0	3.63476e-05	-4.58705	down
comp935766_c0	0.000640051	-4.30517	down
comp94030_c0	0	-8.29509	down
comp94043_c0	0	-6.54385	down
comp94176_c0	1.17425e-05	-4.686	down
comp95228_c0	0.000640051	-4.30517	down
comp95269_c0	3.63476e-05	-4.58705	down
comp95363_c0	0	-8.3261	down
comp95460_c2	0	-6.95247	down
comp95462_c0	4.82933e-05	-1.77076	down
comp95602_c0	1.32306e-05	-3.24484	down
comp95678_c1	0	-7.0762	down
comp96359_c0	8.01463e-08	-1.35756	down
comp96419_c0	0.0091918	-1.2007	down
comp96519_c0	2.42851e-07	-4.987	down
comp96986_c0	1.82369e-05	-1.8029	down
comp97157_c0	1.13007e-11	-5.58264	down
comp97215_c0	9.56743e-09	-5.20288	down
comp97303_c0	3.0087e-14	-5.86196	down
comp97521_c0	0	-7.37946	down
comp97718_c0	1.86517e-14	-5.88297	down
comp97733_c0	4.77165e-08	-5.09898	down
comp978933_c0	0.000201681	-4.42461	down
comp9842_c0	0.000640051	-4.30517	down
comp98438_c0	0.000358842	-4.36613	down
comp9844_c0	0	-6.28137	down
comp98597_c0	7.10543e-15	-5.92409	down
comp99146_c0	0.00413388	-2.30487	down
comp99146_c1	0.00749746	-2.1514	down
comp99728_c0	1.17425e-05	-4.686	down
